# Supplementary material for: Endophytic Microbes from Medicinal Plants in Fenghuang Mountain as a Source of Antibiotics
Source: MDPI journal article supplement (doi:10.3390/molecules28176301), 2023-08-28
Supplement: s1 [file s1]

## *Supplementary Material*

### **Endophytic Microbes from Medicinal Plants in Fenghuang Mountain as a Source of Antibiotics**

Aiping Yang, Yu Hong, Fengjuan Zhou, Ling Zhang, Youjuan Zhu, Chang Wang, Yang Hu, Li Yu, Lihong Chen\* and Xiachang Wang\*

\* **Correspondence:** Xiachang Wang: [xiachangwang@njucm.edu.cn](mailto:xiachangwang@njucm.edu.cn);  
Lihong Chen: [clh\\_helen@njucm.edu.cn](mailto:clh_helen@njucm.edu.cn)

#### **1 Supplementary Figures and Tables**

##### **1.1 Supplementary Figures**

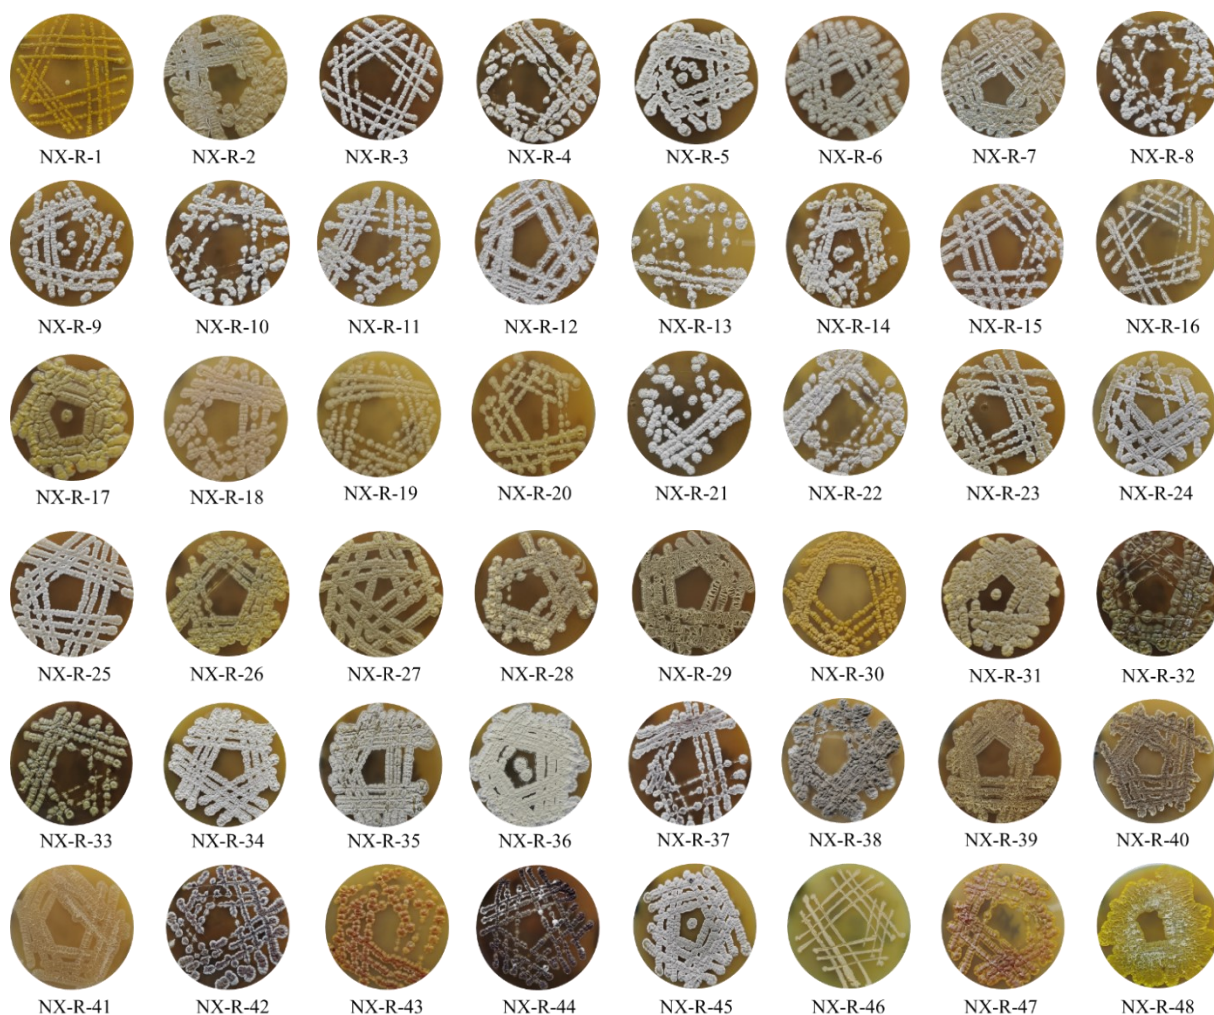

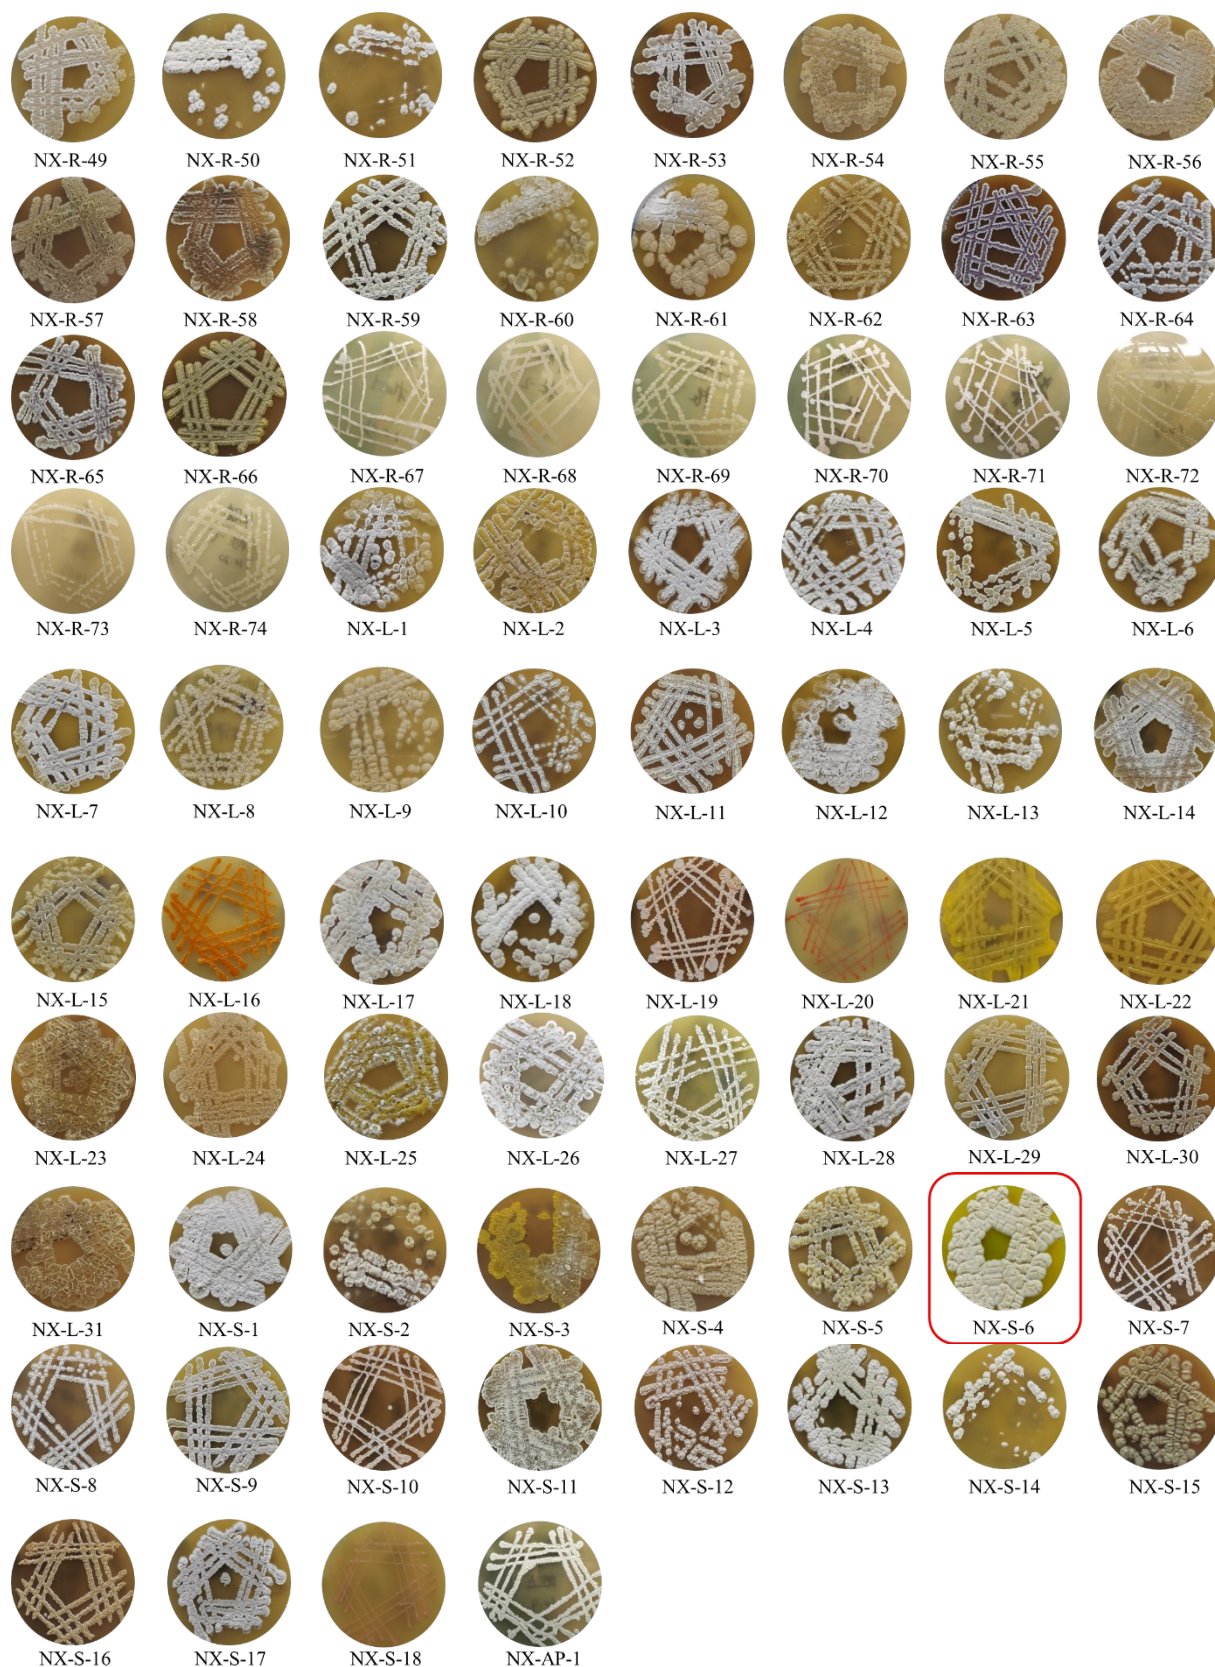

**Supplementary Figure S1.** Morphological features of 124 endophytic strains from *Achyranthes bidentata* (Red box: selected *Penicillium* sp. NX-S-6 for further study).

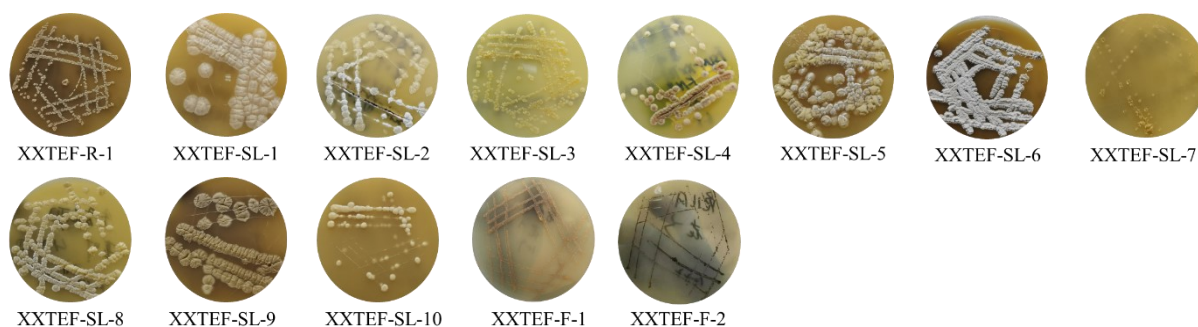

**Supplementary Figure S2.** Morphological features of 13 endophytic strains from *Ainsliaea fragrans*.

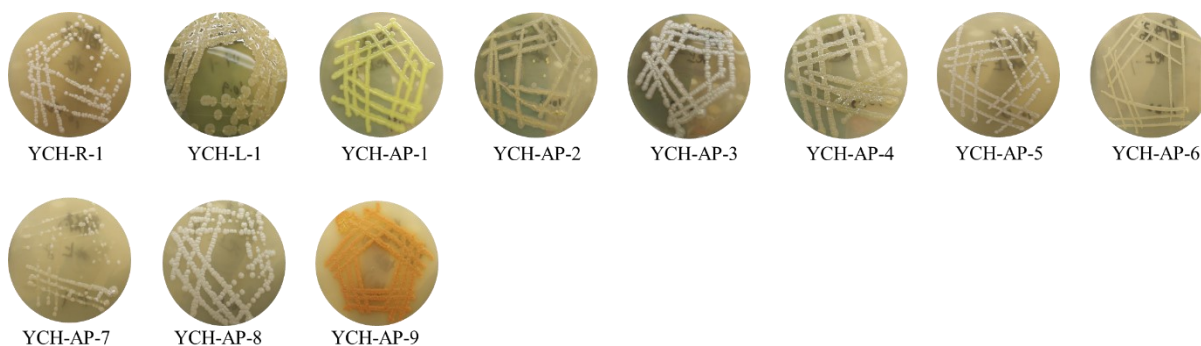

**Supplementary Figure S3.** Morphological features of 11 endophytic strains from *Artemisia capillaris*.

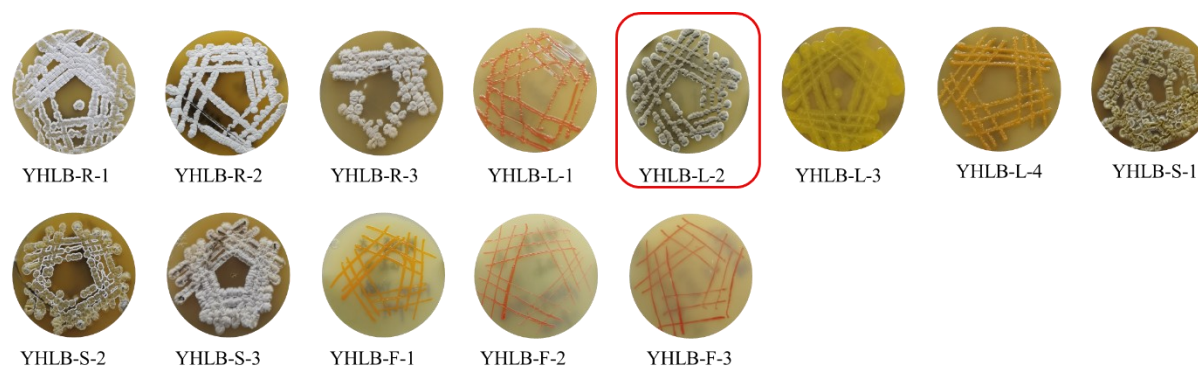

**Supplementary Figure S4.** Morphological features of 13 endophytic strains from *Daucus carota* (Red box: selected *Streptomyces* sp. YHLB-L-2 for further study).

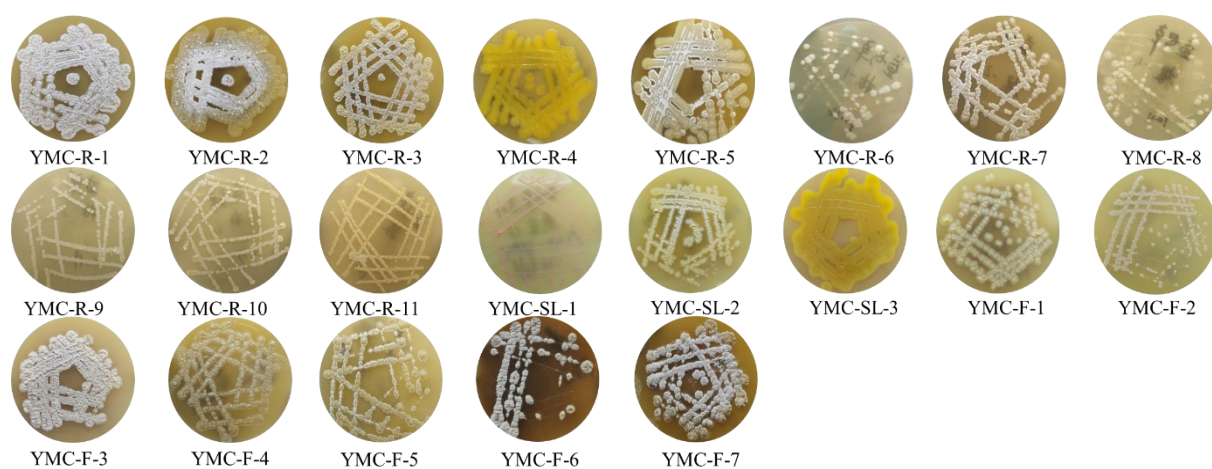

**Supplementary Figure S5.** Morphological features of 21 endophytic strains from *Leonurus japonicus*.

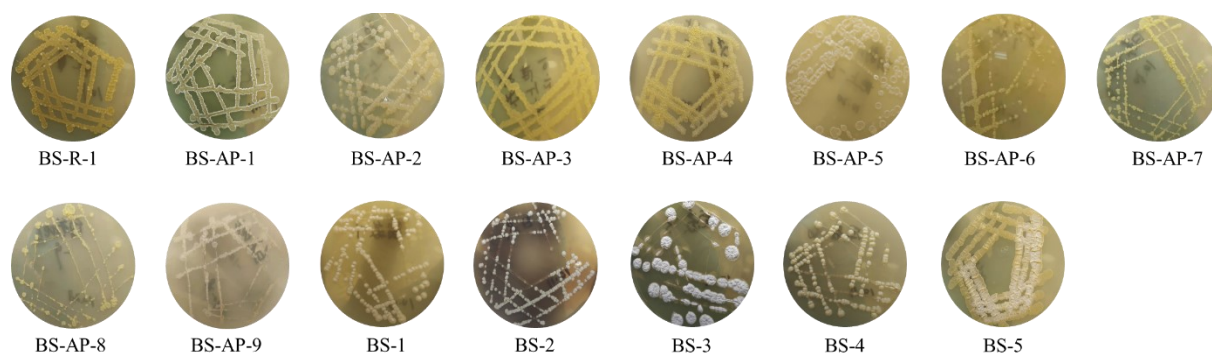

**Supplementary Figure S6.** Morphological features of 15 endophytic strains from *Perilla frutescens*.

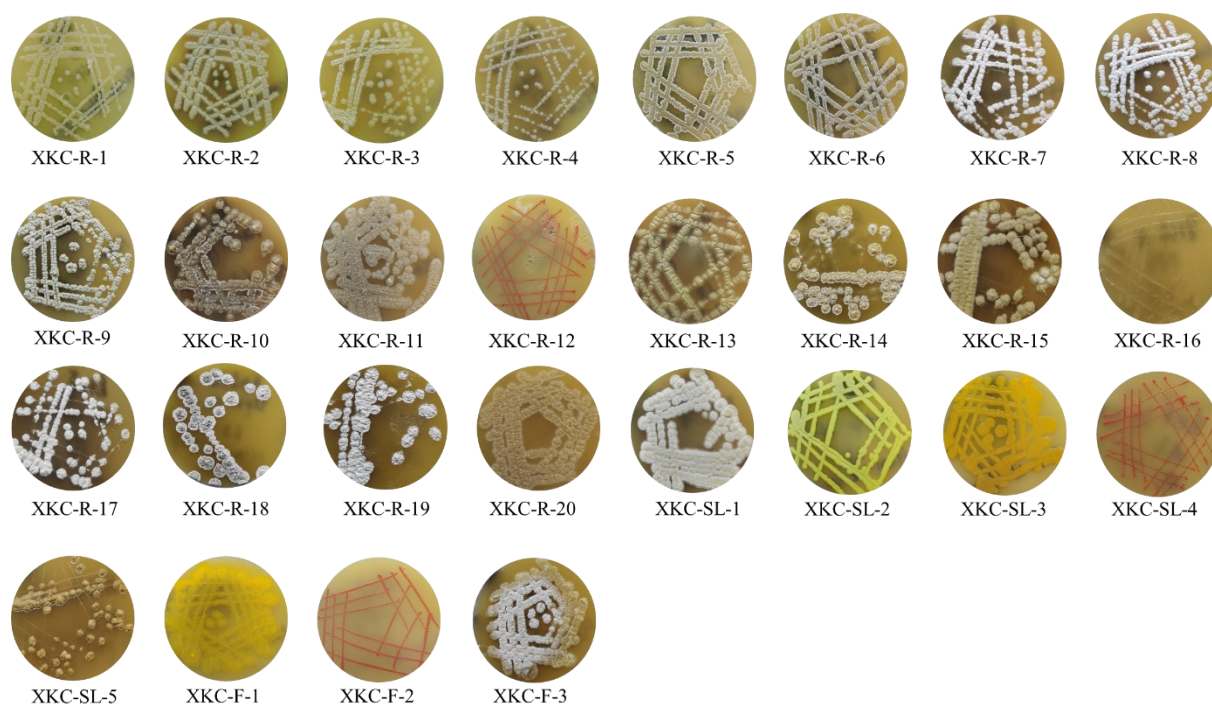

**Supplementary Figure S7.** Morphological features of 28 endophytic strains from *Prunella vulgaris*.

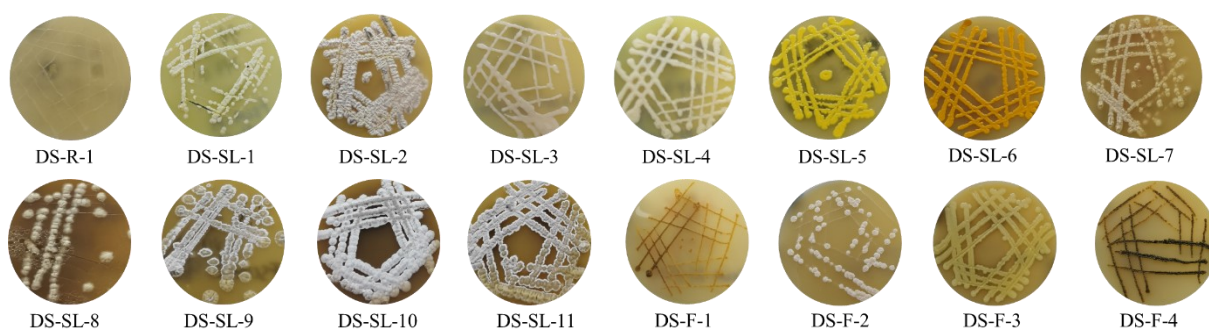

**Supplementary Figure S8.** Morphological features of 16 endophytic strains from *Salvia miltiorrhiza*.

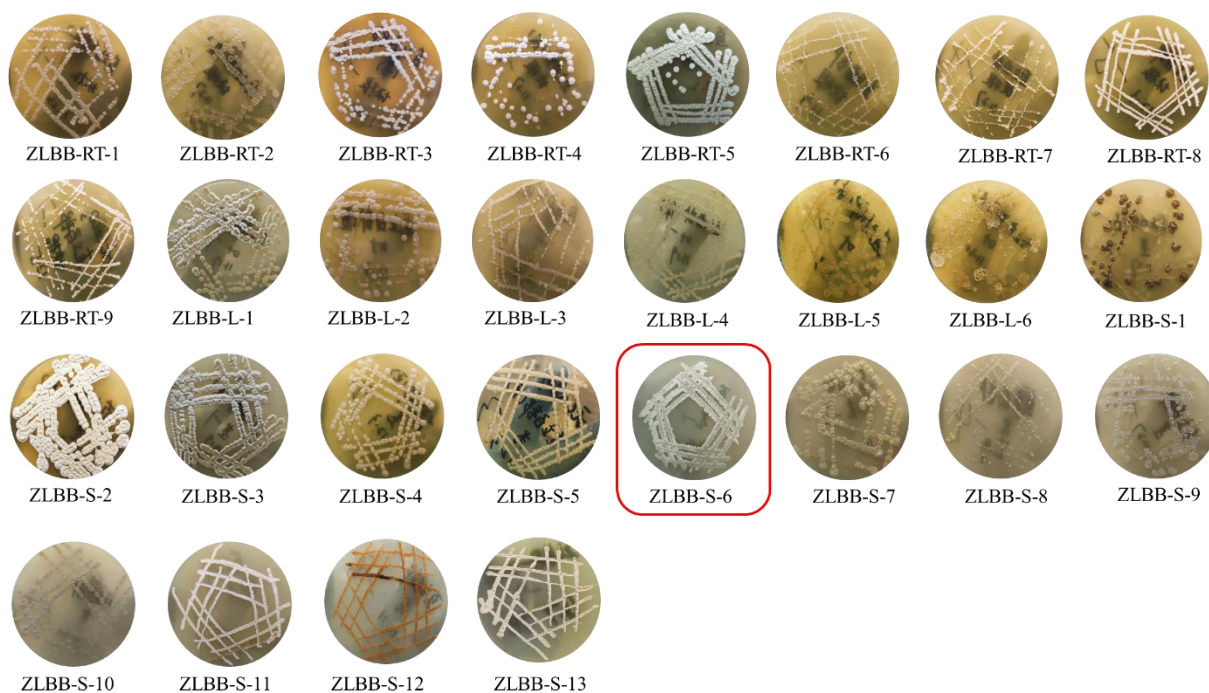

**Supplementary Figure S9.** Morphological features of 28 endophytic strains from *Stemona sessilifolia* (Red box: selected *Streptomyces* sp. ZLBB-S-6 for further study).

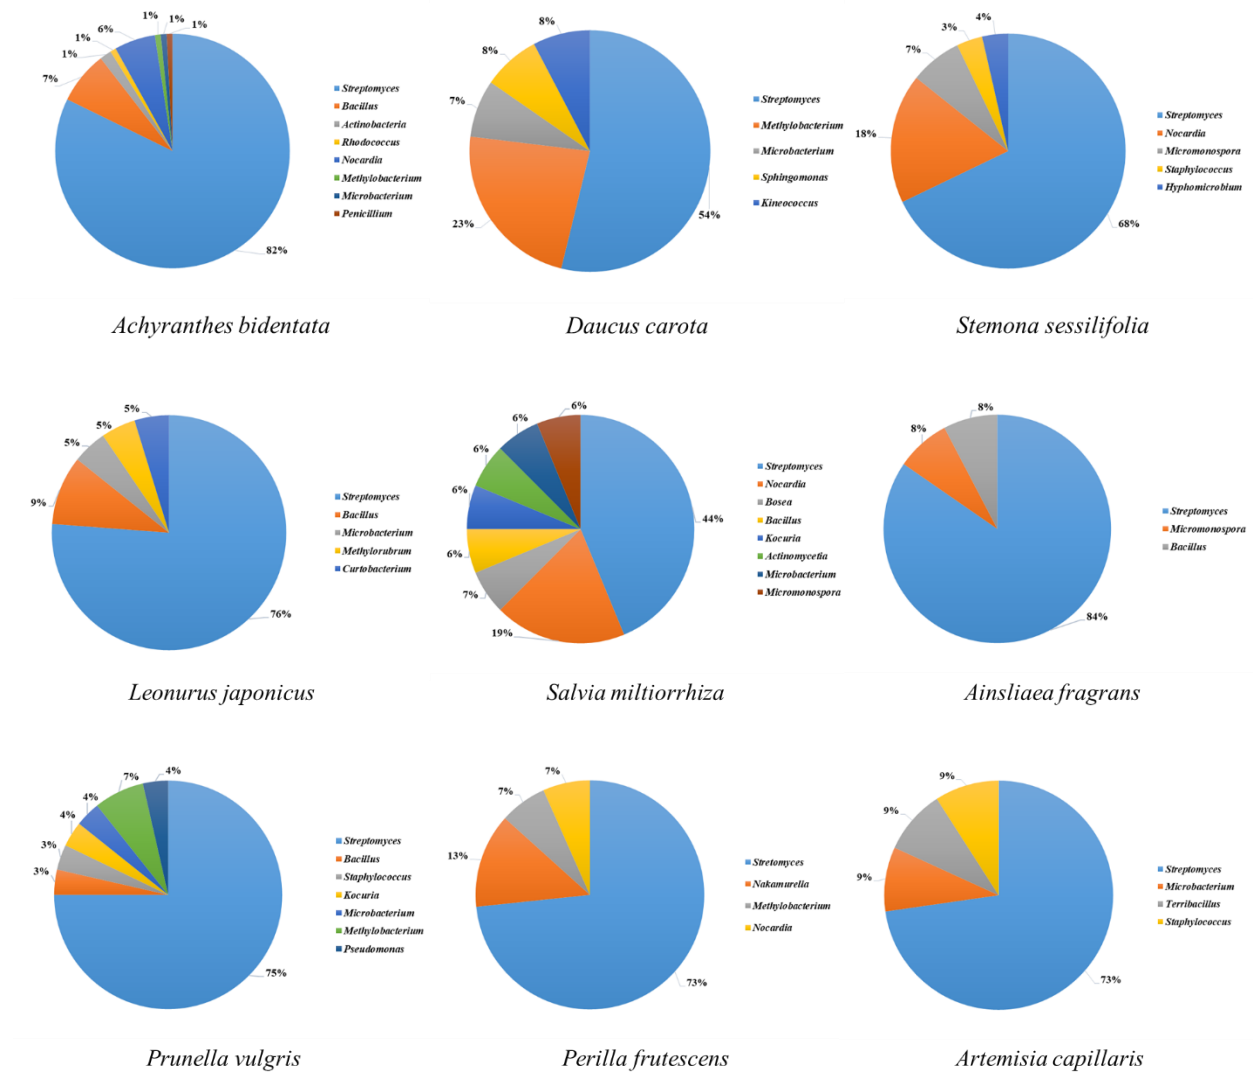

**Supplementary Figure S10.** Diversity analyses of endophytes from nine medicinal plants.

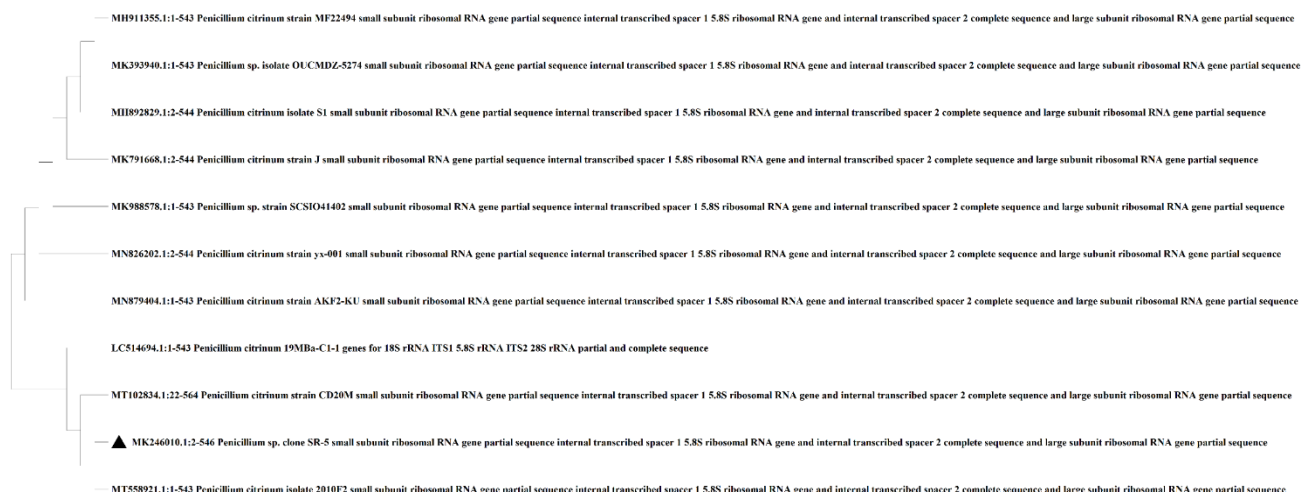

**Supplementary Figure S11.** Evolutionary relationship analysis of *Penicillium* sp. NX-S-6 (▲).

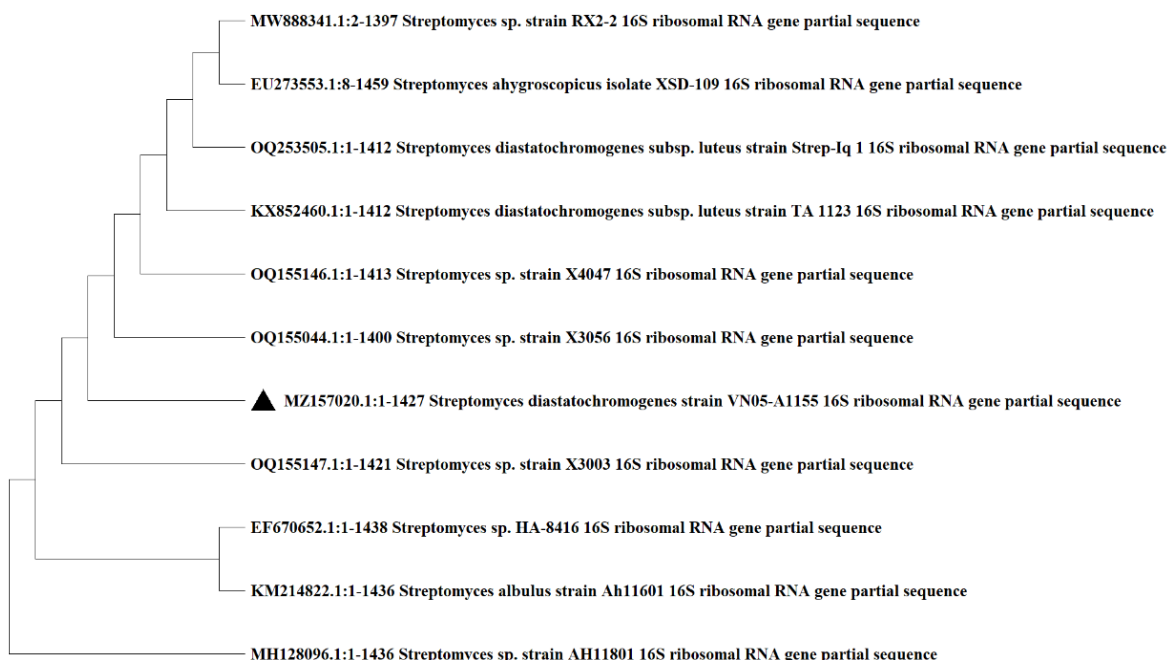

**Supplementary Figure S12.** Evolutionary relationship analysis of *Streptomyces* sp. YHLB-L-2 (▲).

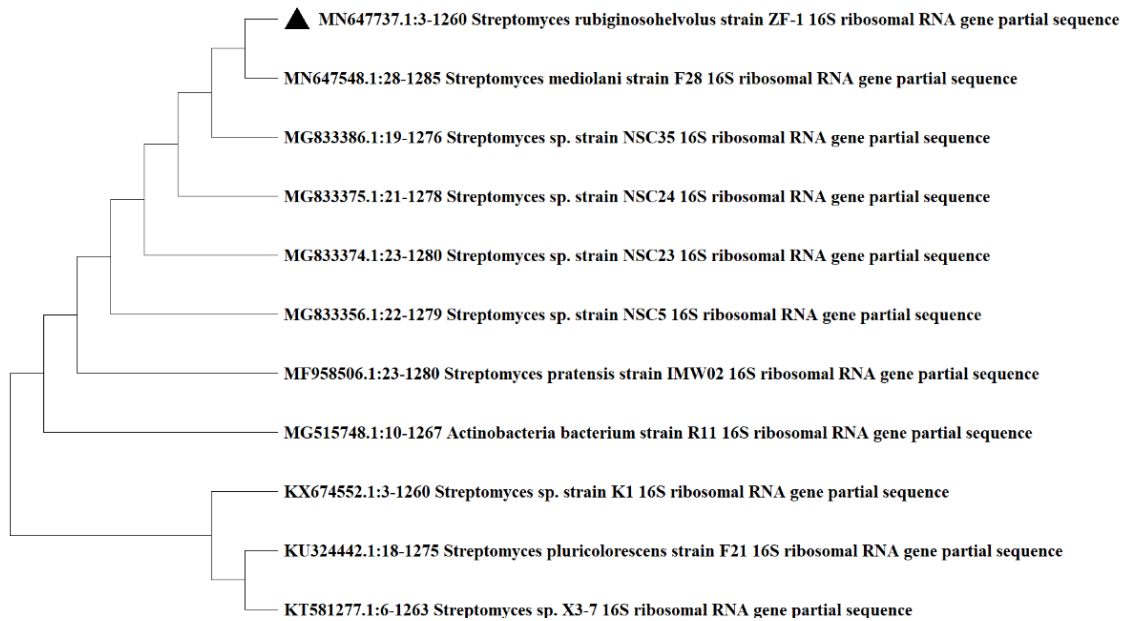

**Supplementary Figure S13.** Evolutionary relationship analysis of *Streptomyces* sp. ZLBB-S-6 (▲).

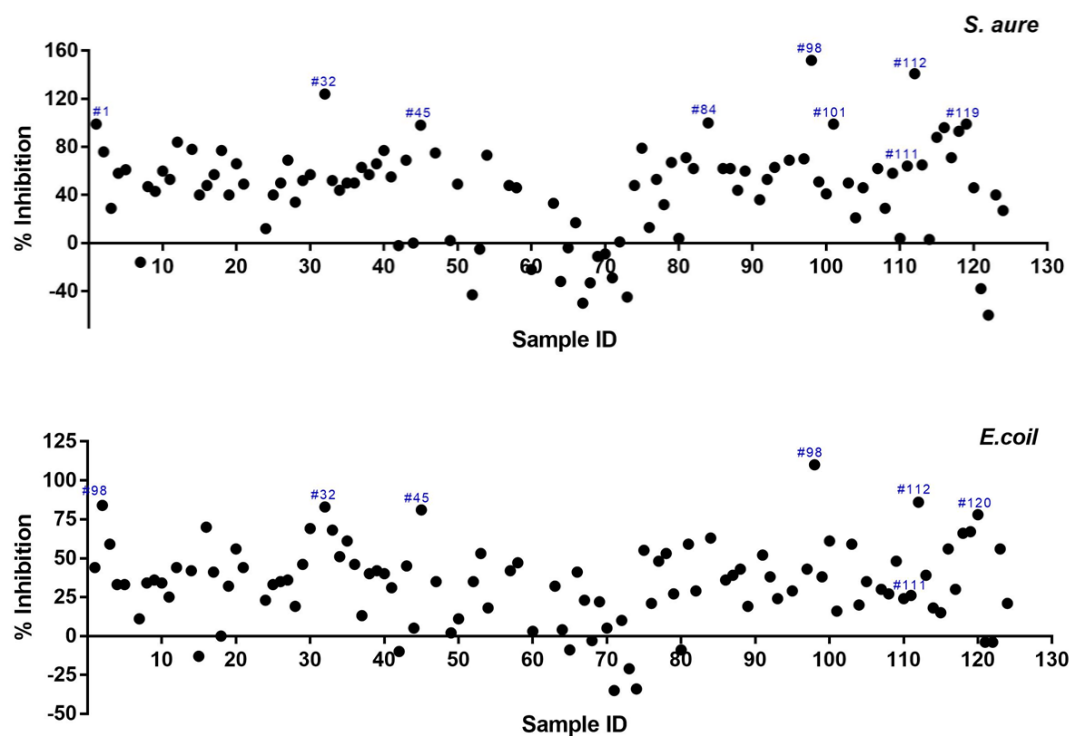

**Supplementary Figure S14.** Scatterplots of 124 strain extracts (1.0 mg/mL) from *Achyranthes bidentata* screened in *S. aureus* and *E. coli* inhibitory assay.

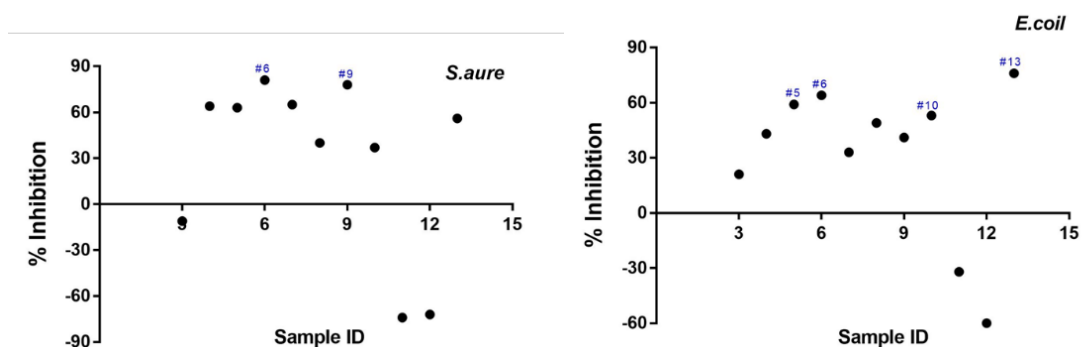

**Supplementary Figure S15.** Scatterplots of 13 strain extracts (1.0 mg/mL) from *Ainsliaea fragrans* screened in *S. aureus* and *E. coli* inhibitory assay.

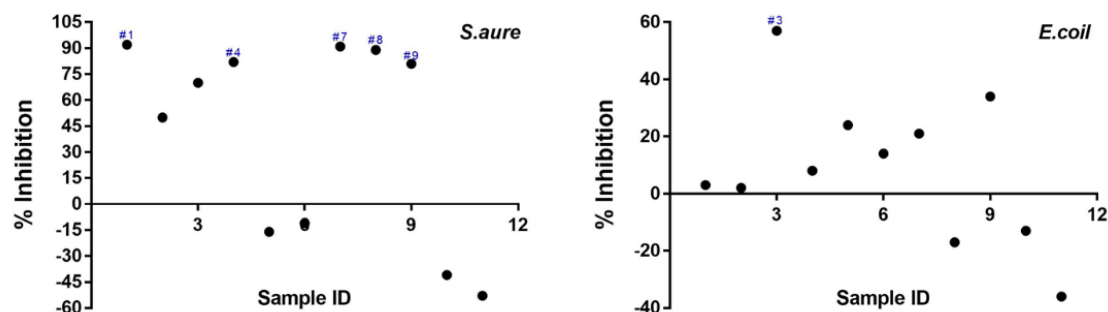

**Supplementary Figure S16.** Scatterplots of 11 strain extracts (1.0 mg/mL) from *Artemisia capillaris* screened in *S. aureus* and *E. coli* inhibitory assay.

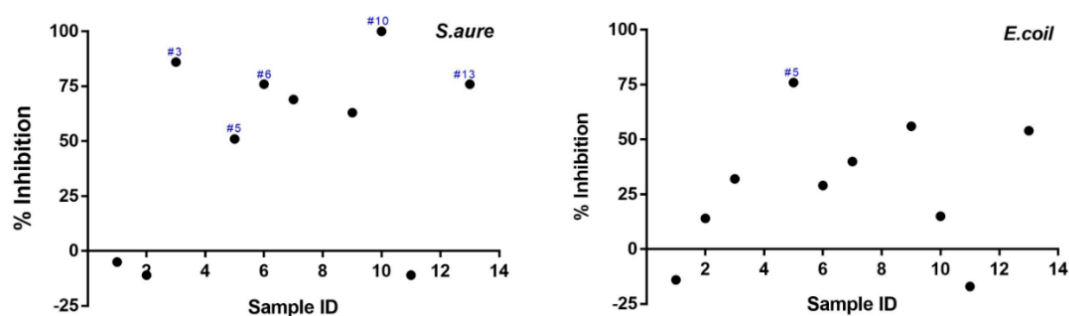

**Supplementary Figure S17.** Scatterplots of 13 strain extracts (1.0 mg/mL) from *Daucus carota* screened in *S. aureus* and *E. coli* inhibitory assay.

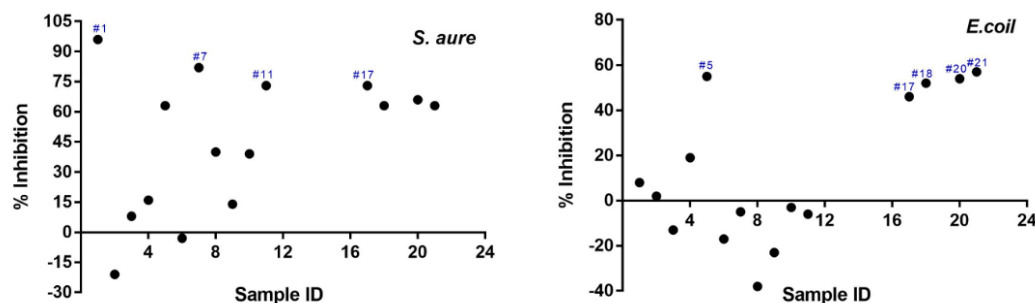

**Supplementary Figure S18.** Scatterplots of 21 strain extracts (1.0 mg/mL) from *Leonurus japonicus* screened in *S. aureus* and *E. coli* inhibitory analyses.

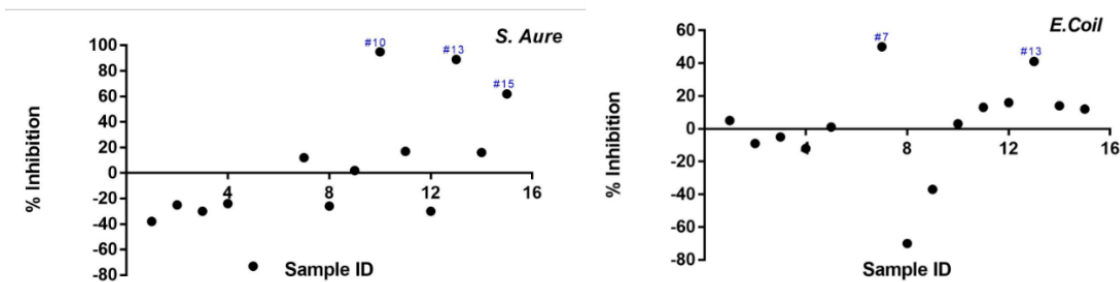

**Supplementary Figure S19.** Scatterplots of 15 strain extracts (1.0 mg/mL) from *Perilla frutescens* screened in *S. aureus* and *E. coli* inhibitory assay.

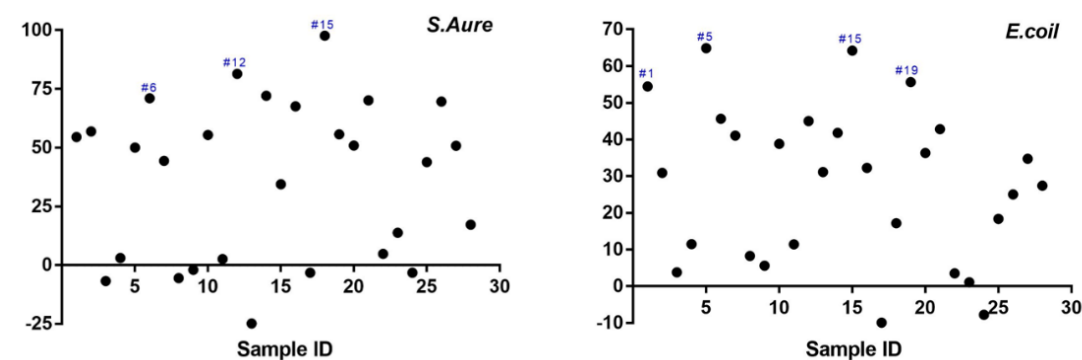

**Supplementary Figure S20.** Scatterplots of 28 strain extracts (1.0 mg/mL) from *Prunella vulgaris* screened in *S. aureus* and *E. coli* inhibitory assay.

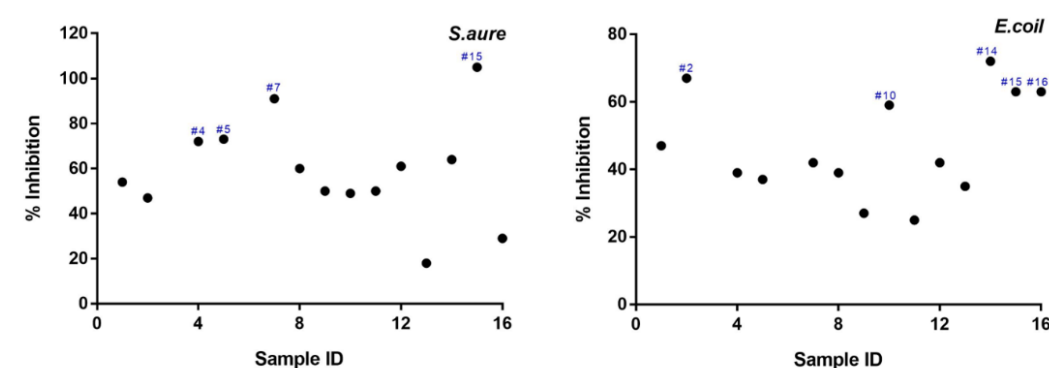

**Supplementary Figure S21.** Scatterplots of 16 strain extracts (1.0 mg/mL) from *Salvia miltiorrhiza* screened in *S. aureus* and *E. coli* inhibitory assay.

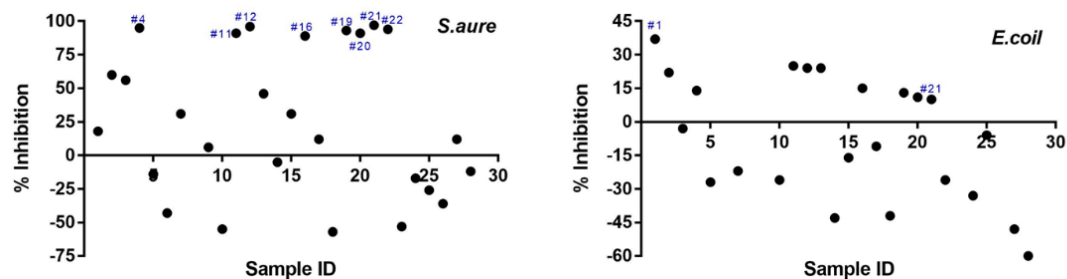

**Supplementary Figure S22.** Scatterplots of 28 strain extracts (1.0 mg/mL) from *Stemona sessilifolia* screened in *S. aureus* and *E. coli* inhibitory assay.

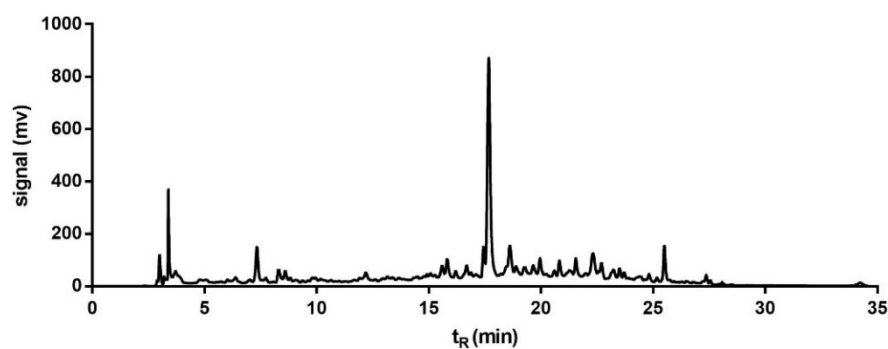

**Supplementary Figure S23.** HPLC spectrum of *Penicillium sp.* NX-S-6

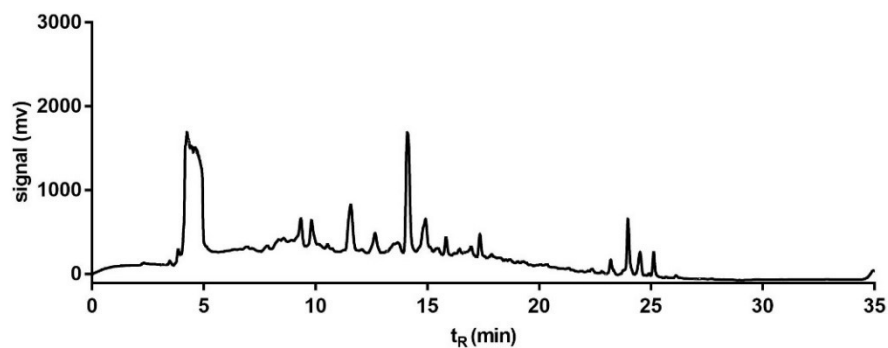

**Supplementary Figure S24.** HPLC spectrum of *Streptomyces sp.* YHLB-L-2

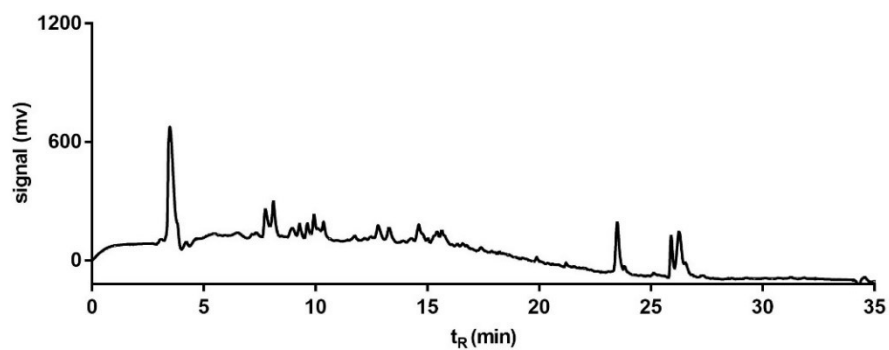

**Supplementary Figure S25.** HPLC spectrum of *Streptomyces* sp. ZLBB-S-6

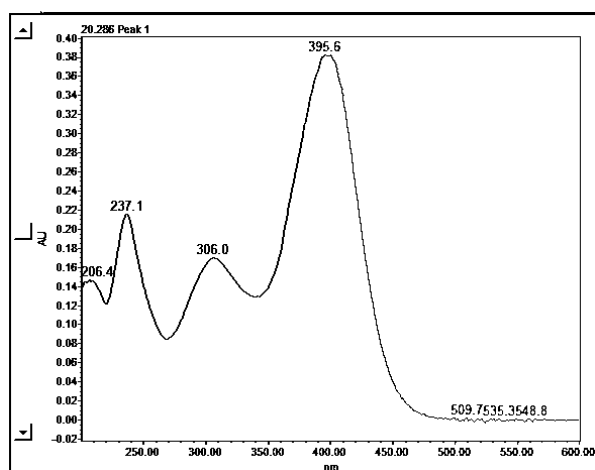

**Supplementary Figure S26.** UV spectrum of compound 1.

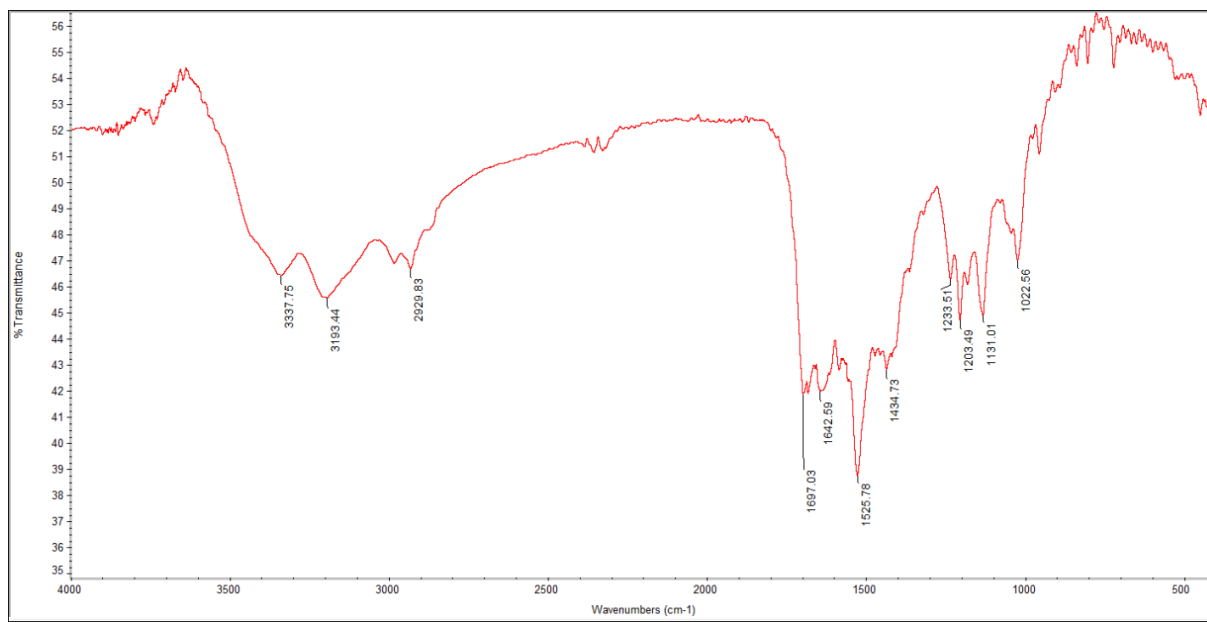

**Supplementary Figure S27.** IR spectrum of compound 1.

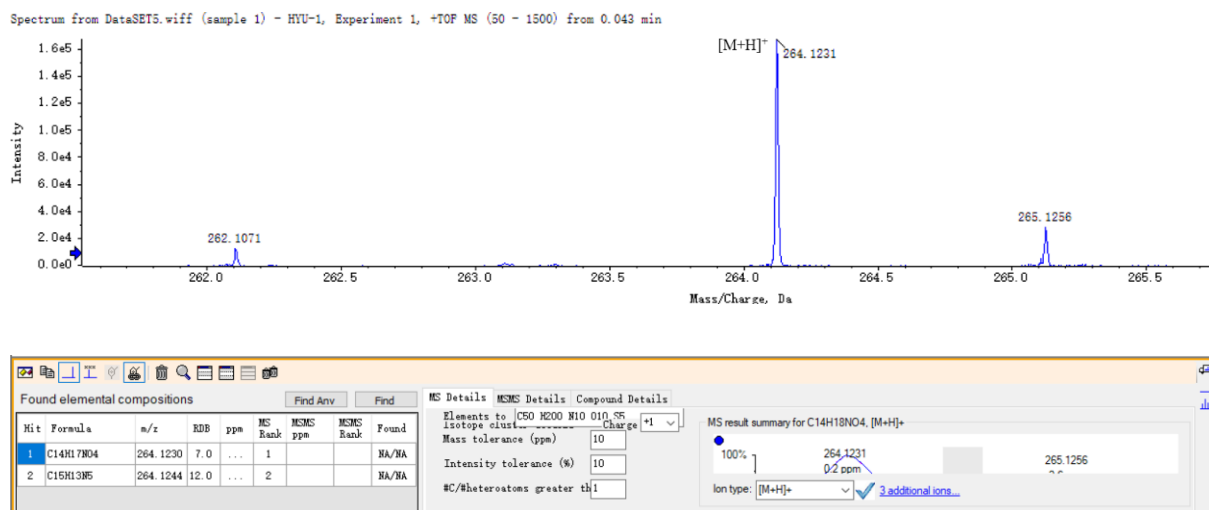

Supplementary Figure S28. (+)-HRESI-MS spectrum of compound 1.

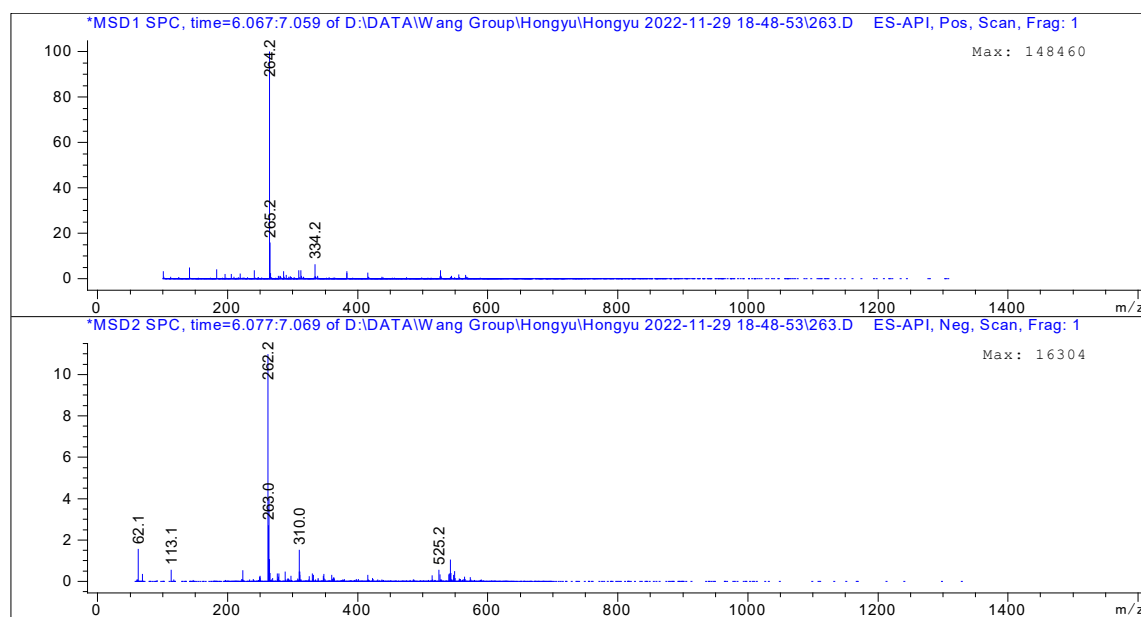

Supplementary Figure S29. (+) and (-)-ESI-MS of compound 1.

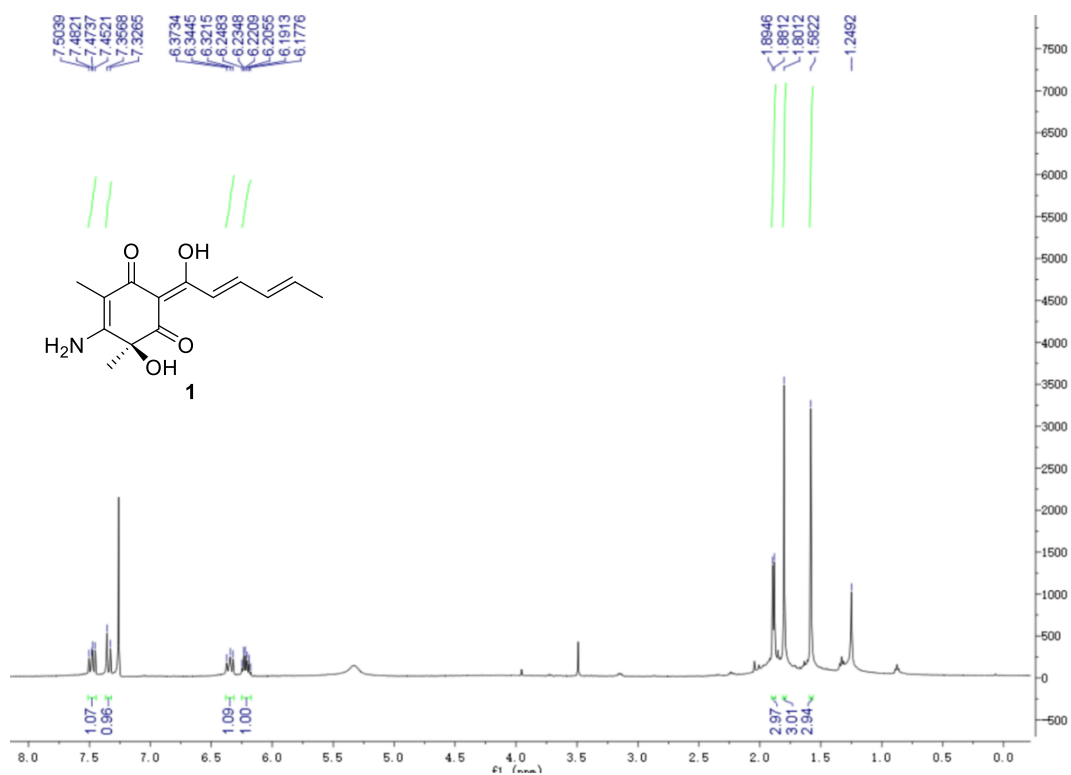

**Supplementary Figure S30.**  $^1\text{H}$  NMR (500 MHz,  $\text{CDCl}_3$ ) spectrum of compound **1**.

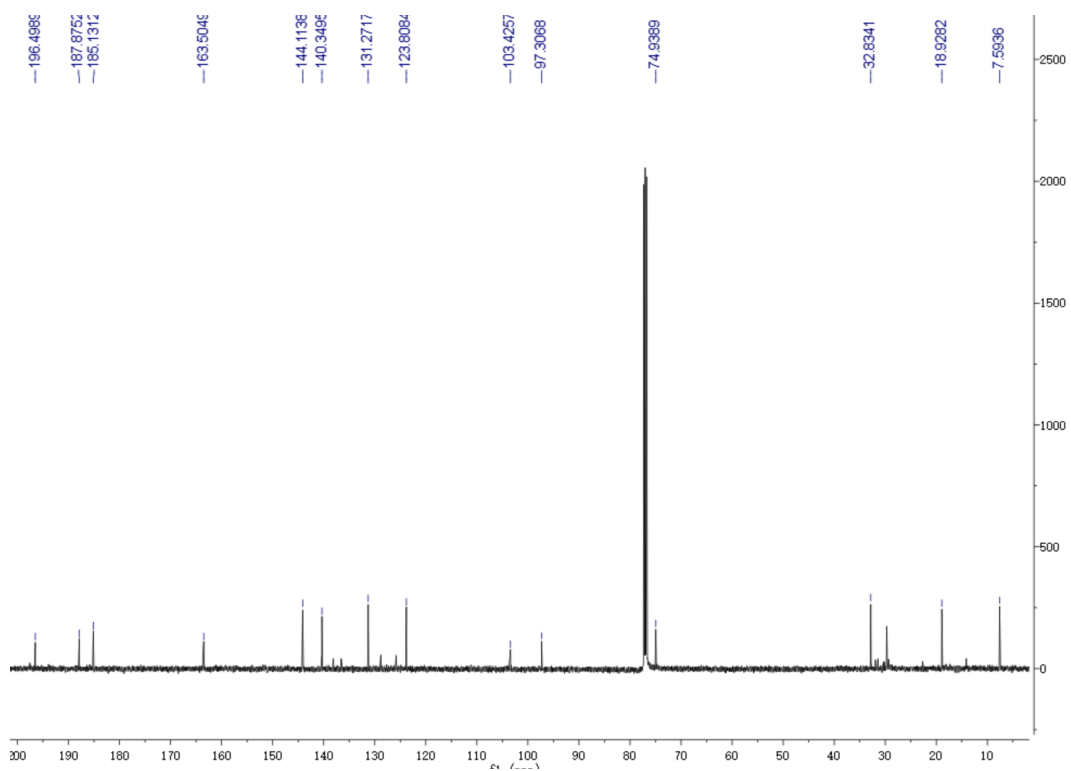

**Supplementary Figure S31.**  $^{13}\text{C}$  NMR (125 MHz,  $\text{CDCl}_3$ ) spectrum of compound **1**.

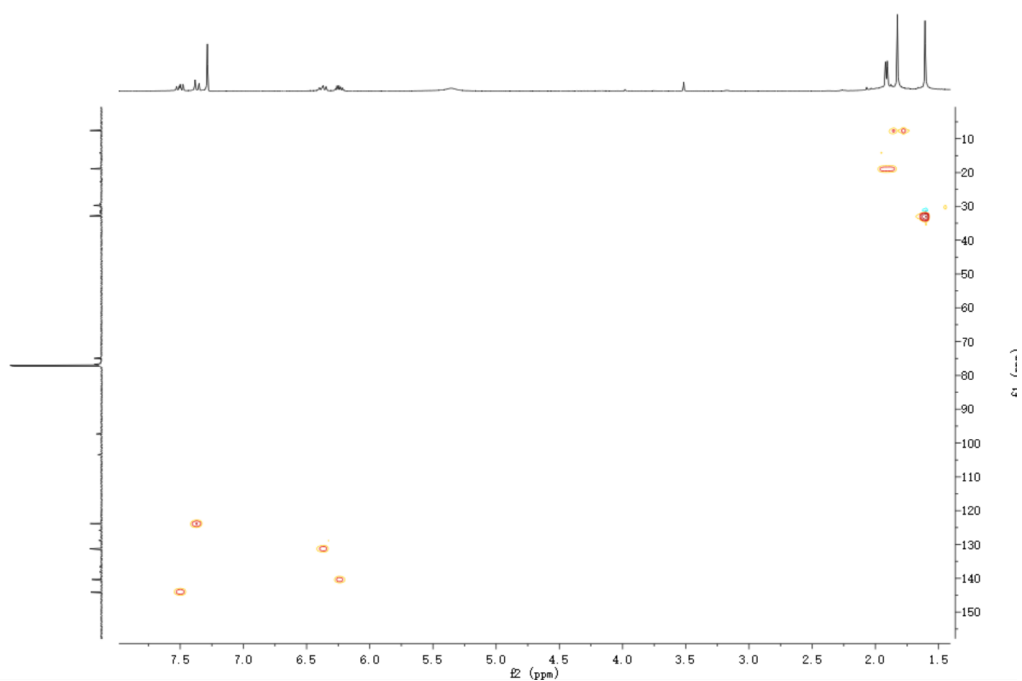

**Supplementary Figure S32.** HSQC (500 MHz, CDCl<sub>3</sub>) spectrum of compound **1**.

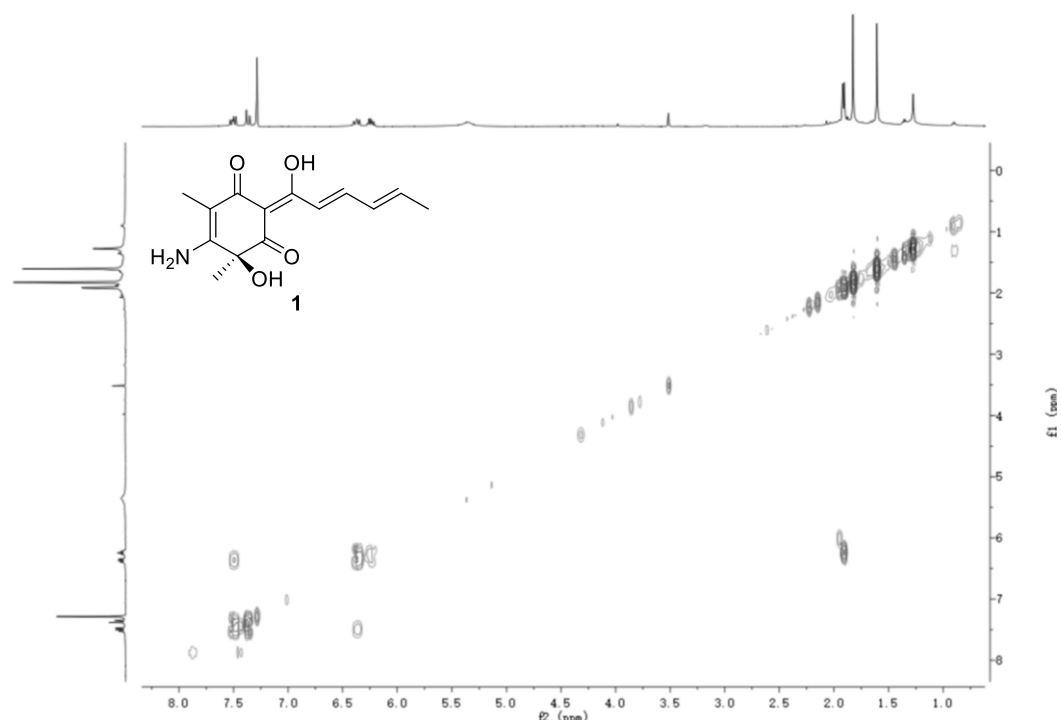

**Supplementary Figure S33.** <sup>1</sup>H-<sup>1</sup>H COSY (500 MHz, CDCl<sub>3</sub>) spectrum of compound **1**.

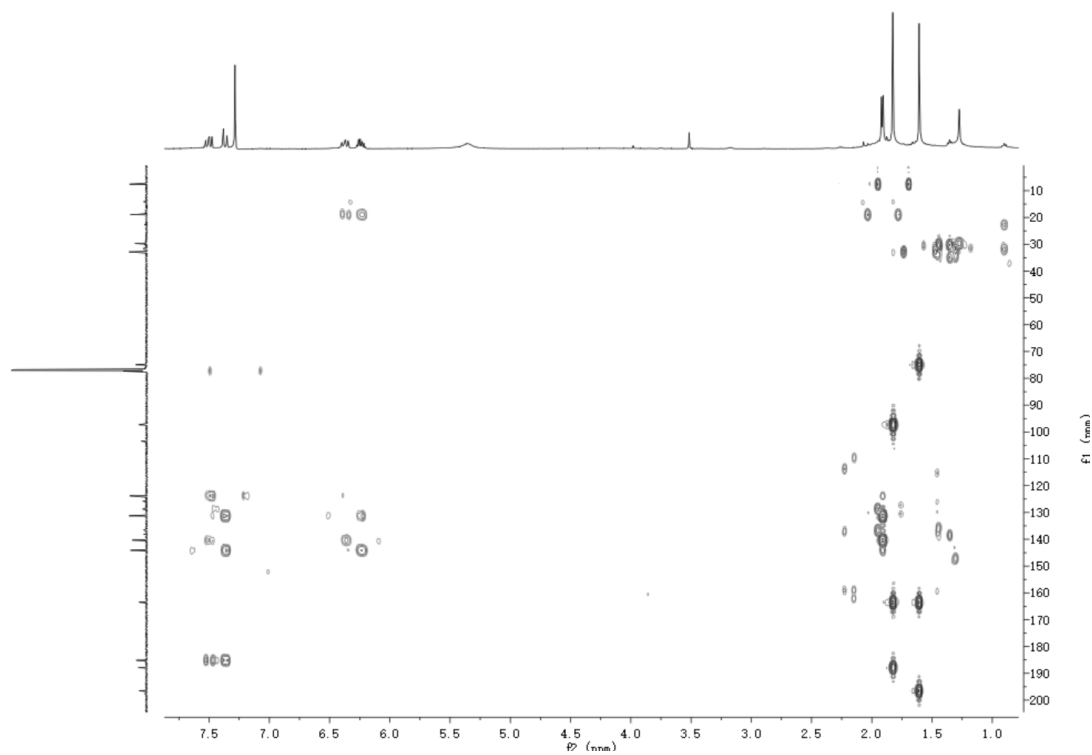

**Supplementary Figure S34.** HMBC (500 MHz, CDCl<sub>3</sub>) spectrum of compound **1**.

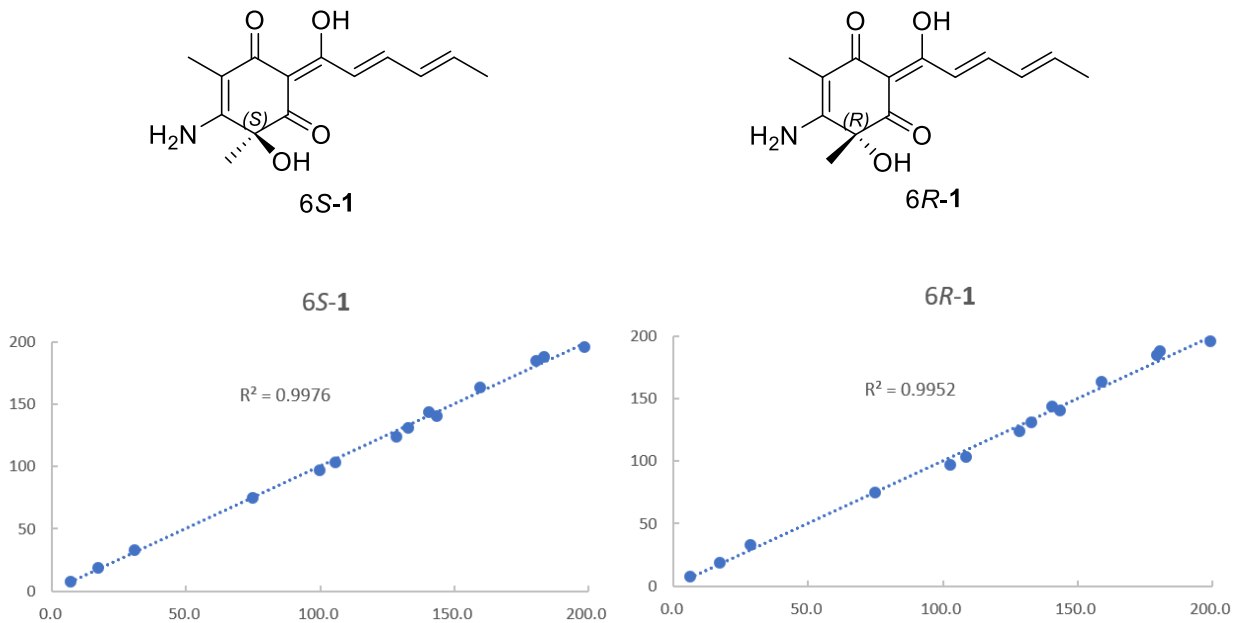

**Supplementary Figure S35.** Regression analysis of the experimental vs calculated <sup>13</sup>C NMR chemical shifts of **1** at the B3LYP/6-311+G(d,p) level in CDCl<sub>3</sub>.

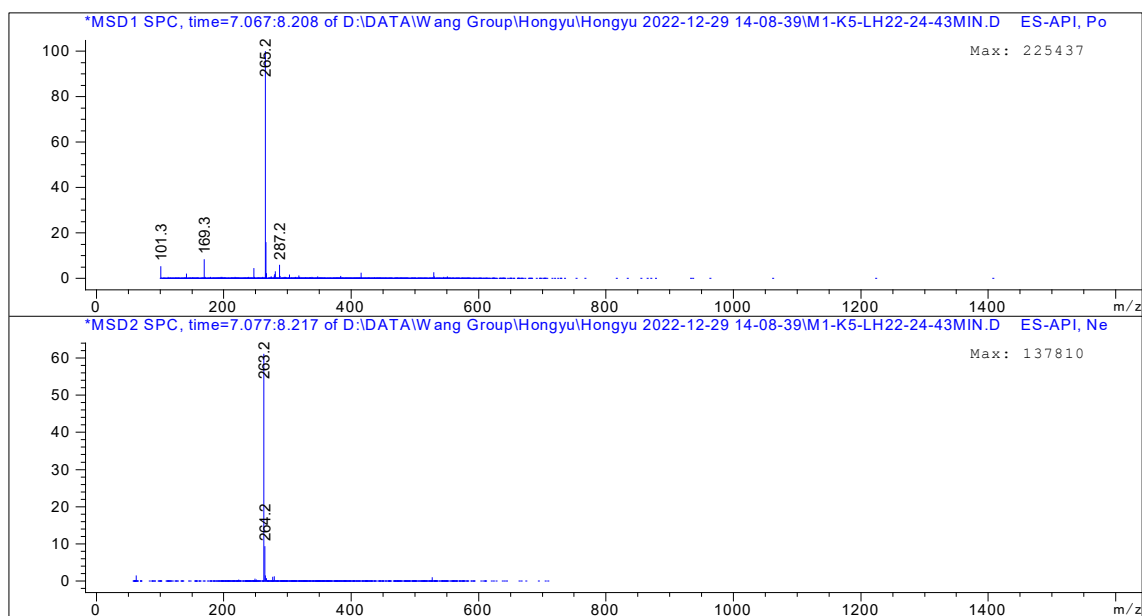

**Supplementary Figure S36.** (+) and (–)-ESI-MS of compound **2**.

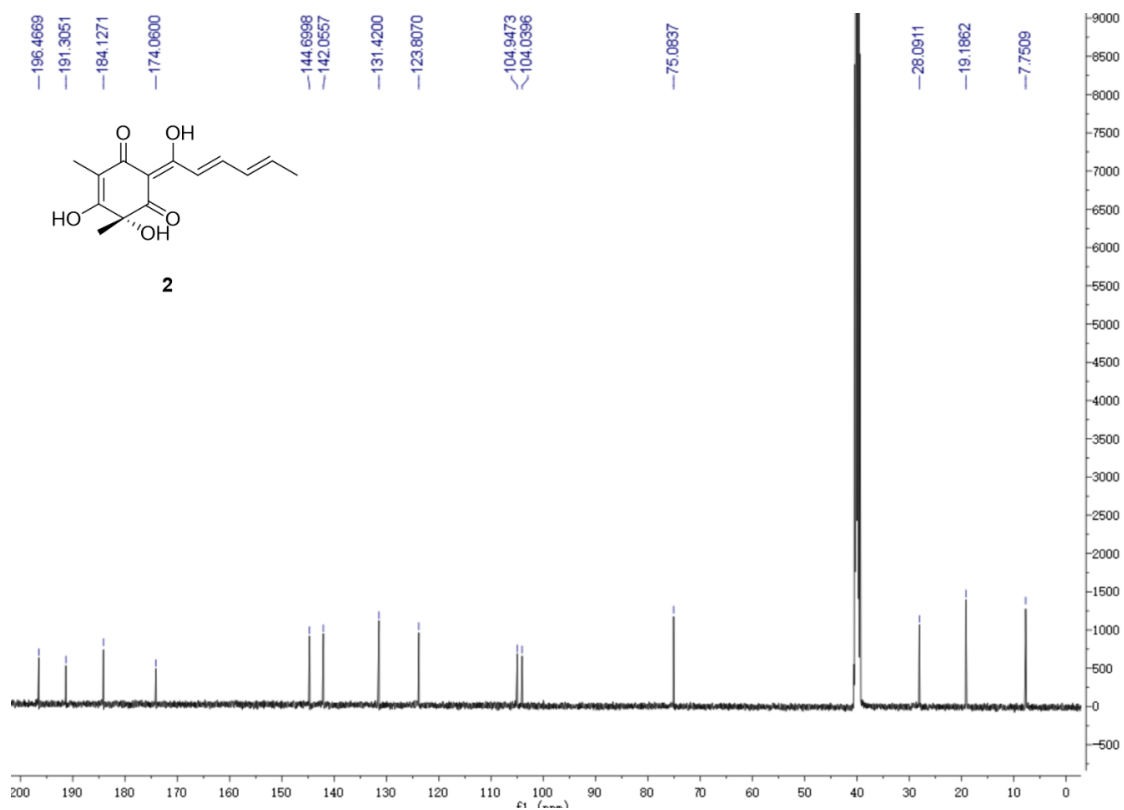

**Supplementary Figure S37.**  $^{13}\text{C}$  NMR (125 MHz,  $\text{DMSO}-d_6$ ) spectrum of compound **2**.

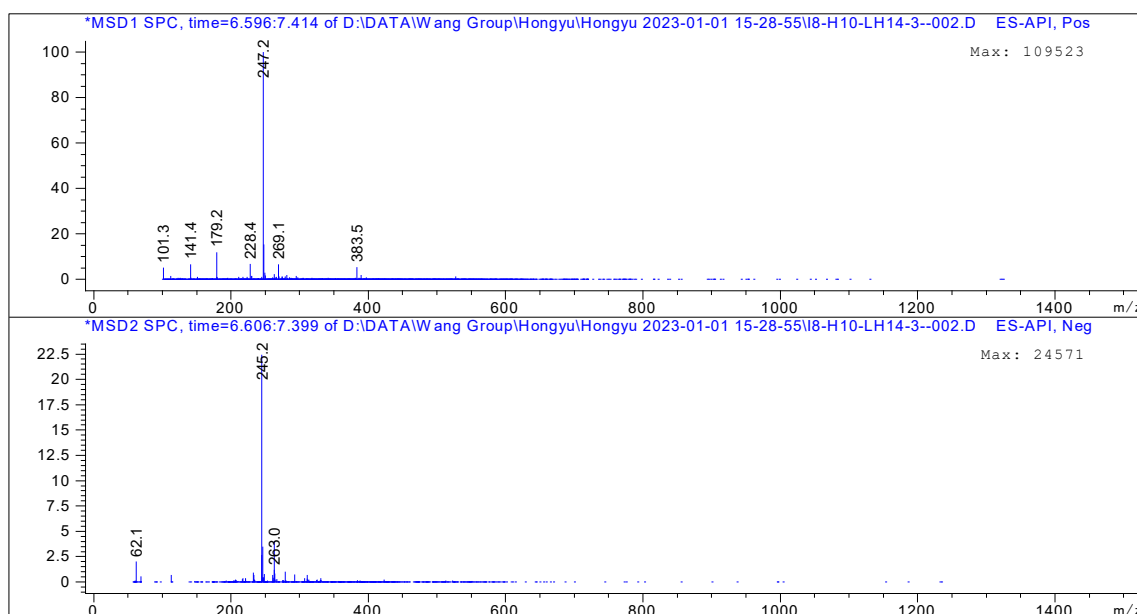

**Supplementary Figure S38.** (+) and (–)-ESI-MS of compound **3**.

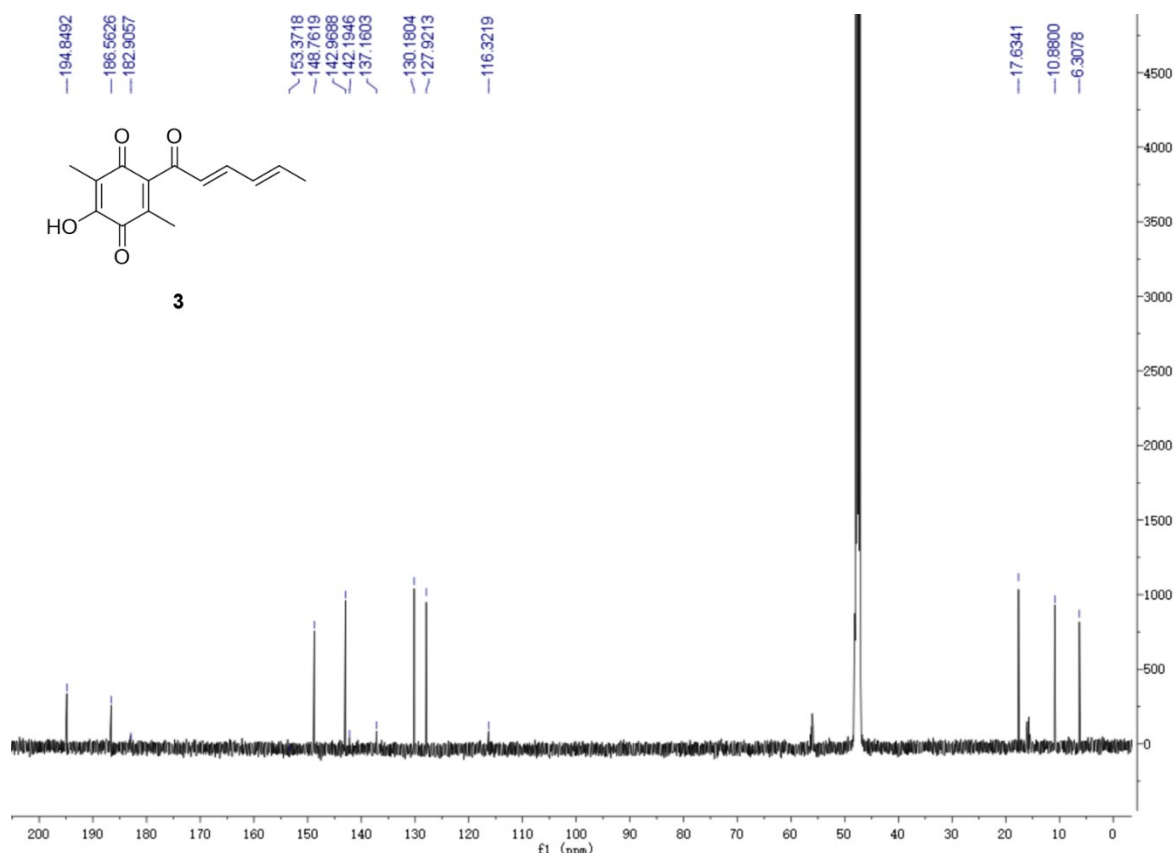

**Supplementary Figure S39.**  $^{13}\text{C}$  NMR (125 MHz,  $\text{CD}_3\text{OD}$ ) spectrum of compound **3**.

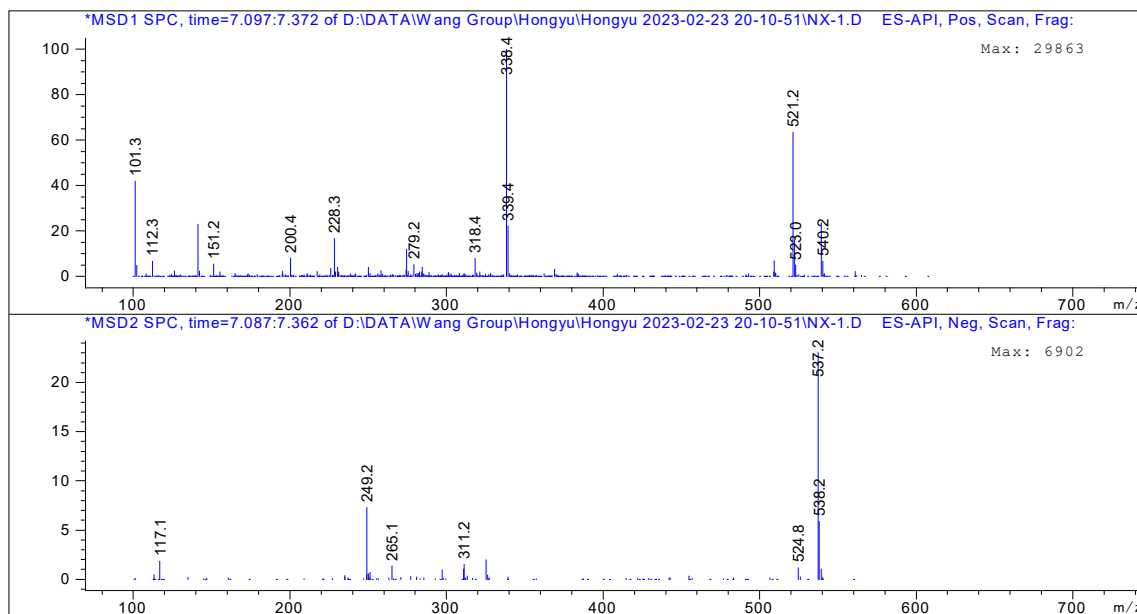

Supplementary Figure S40. (+) and (-)-ESI-MS of compound **4**.

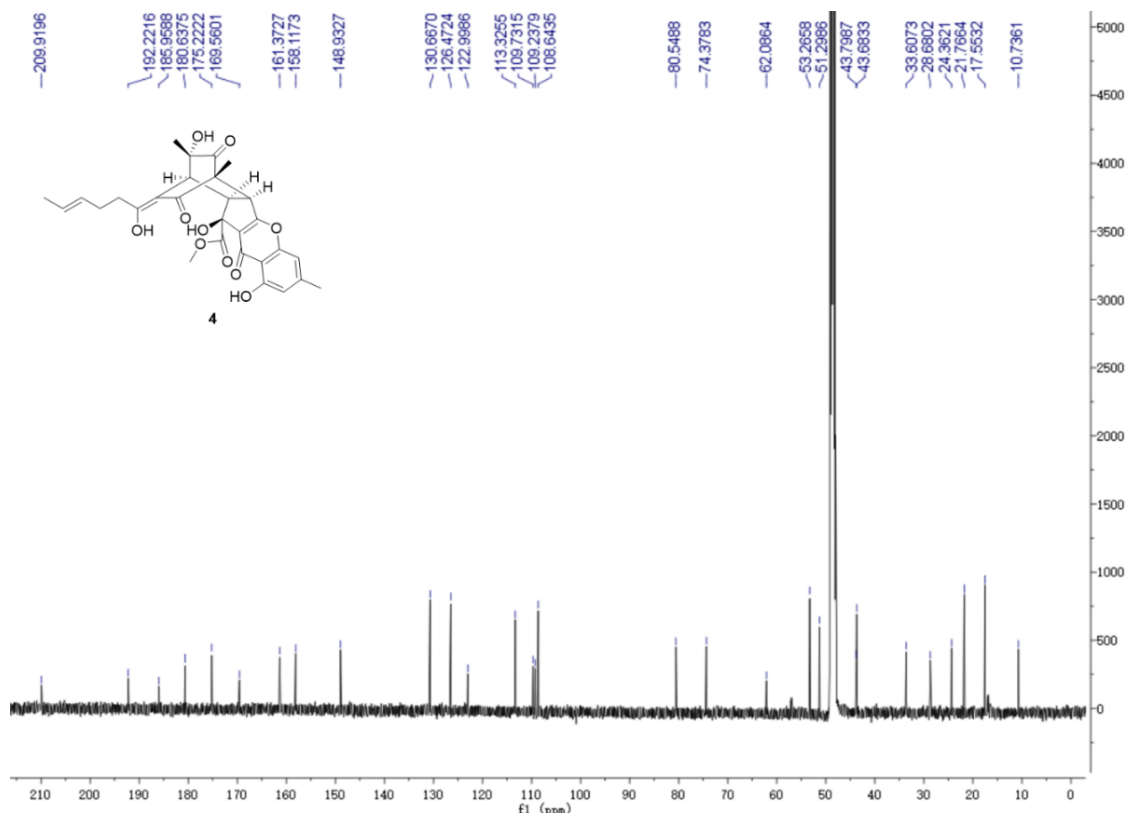

Supplementary Figure S41.  $^{13}\text{C}$  NMR (125 MHz,  $\text{CD}_3\text{OD}$ ) spectrum of compound **4**.

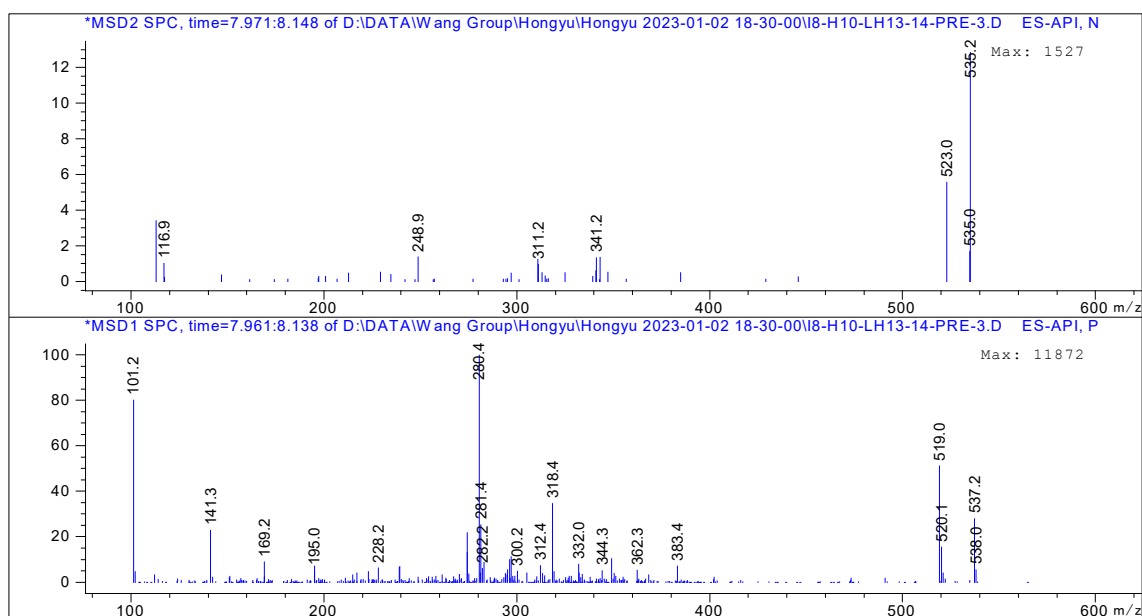

**Supplementary Figure S42.** (+) and (-)-ESI-MS of compound **5**.

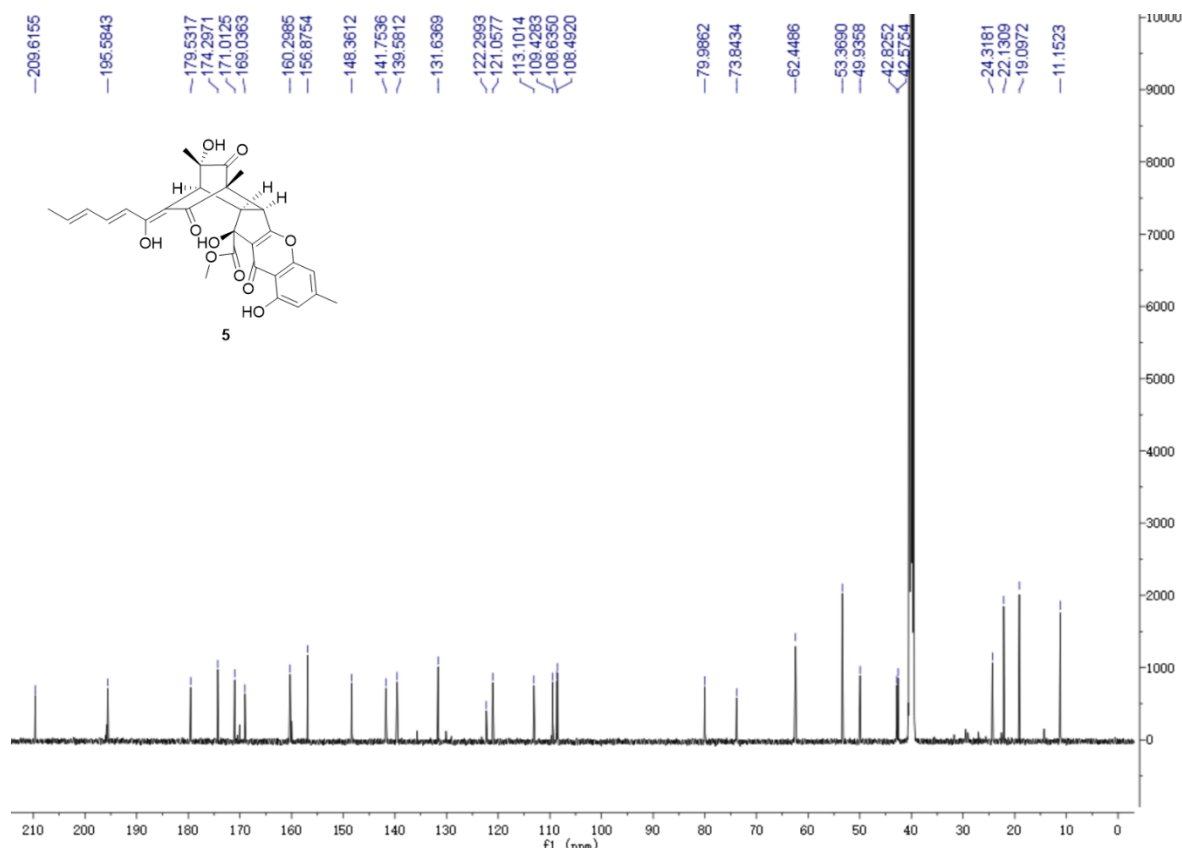

**Supplementary Figure S43.**  $^{13}\text{C}$  NMR (125 MHz,  $\text{DMSO}-d_6$ ) spectrum of compound **5**.

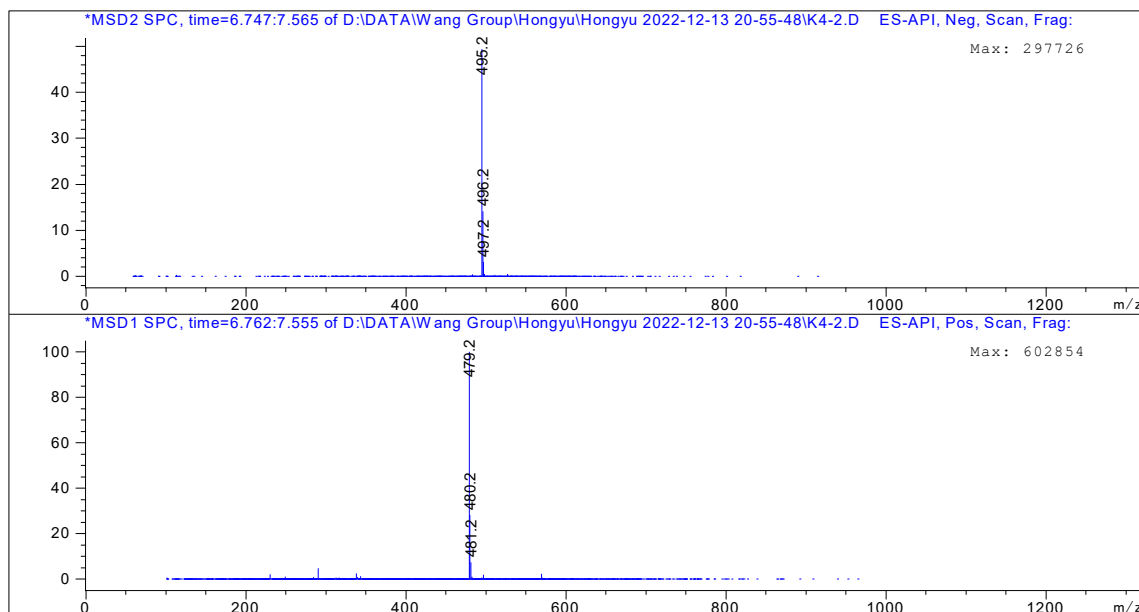Supplementary Figure S44. (+) and (-)-ESI-MS of compound **6**.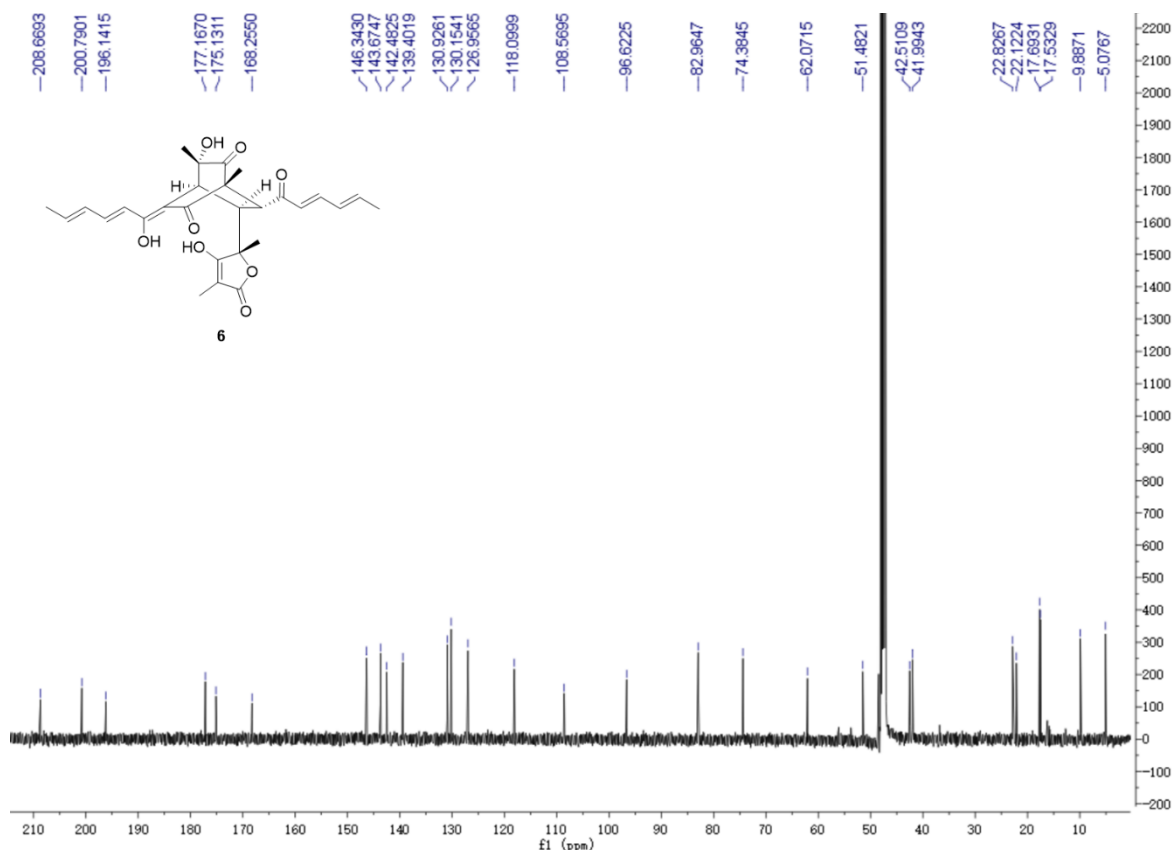Supplementary Figure S45.  $^{13}\text{C}$  NMR (125 MHz,  $\text{CD}_3\text{OD}$ ) spectrum of compound **6**.

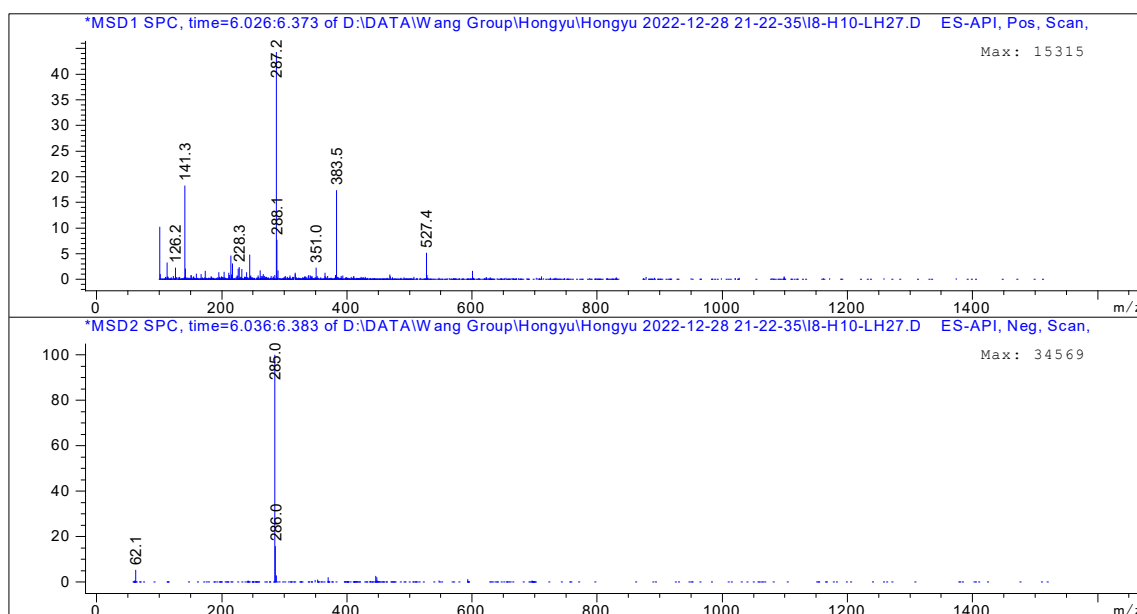

**Supplementary Figure S46.** (+) and (-)-ESI-MS of compound **7**.

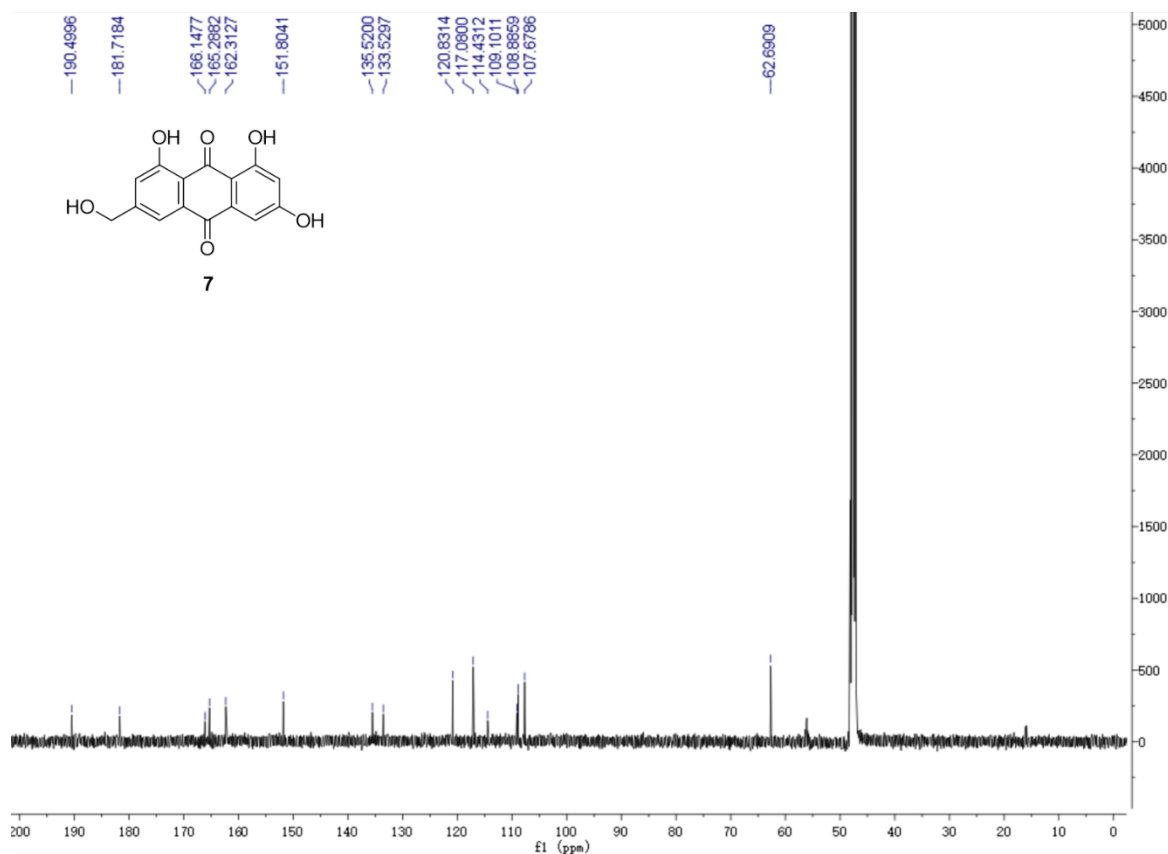

**Supplementary Figure S47.**  $^{13}\text{C}$  NMR (125 MHz,  $\text{CD}_3\text{OD}$ ) spectrum of compound **7**.

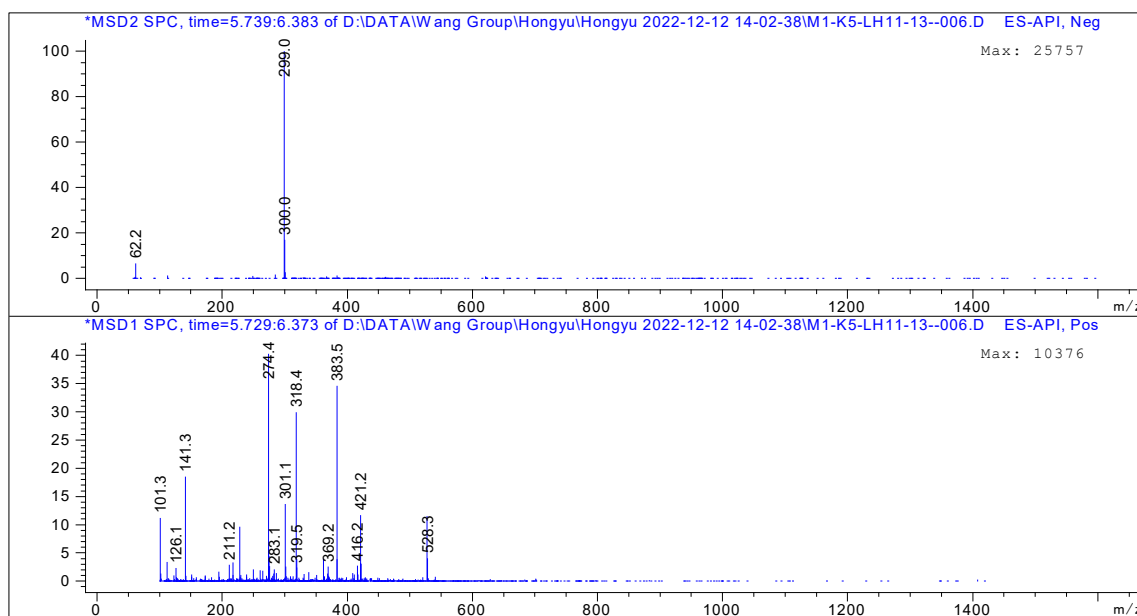Supplementary Figure S48. (+) and (-)-ESI-MS of compound **8**.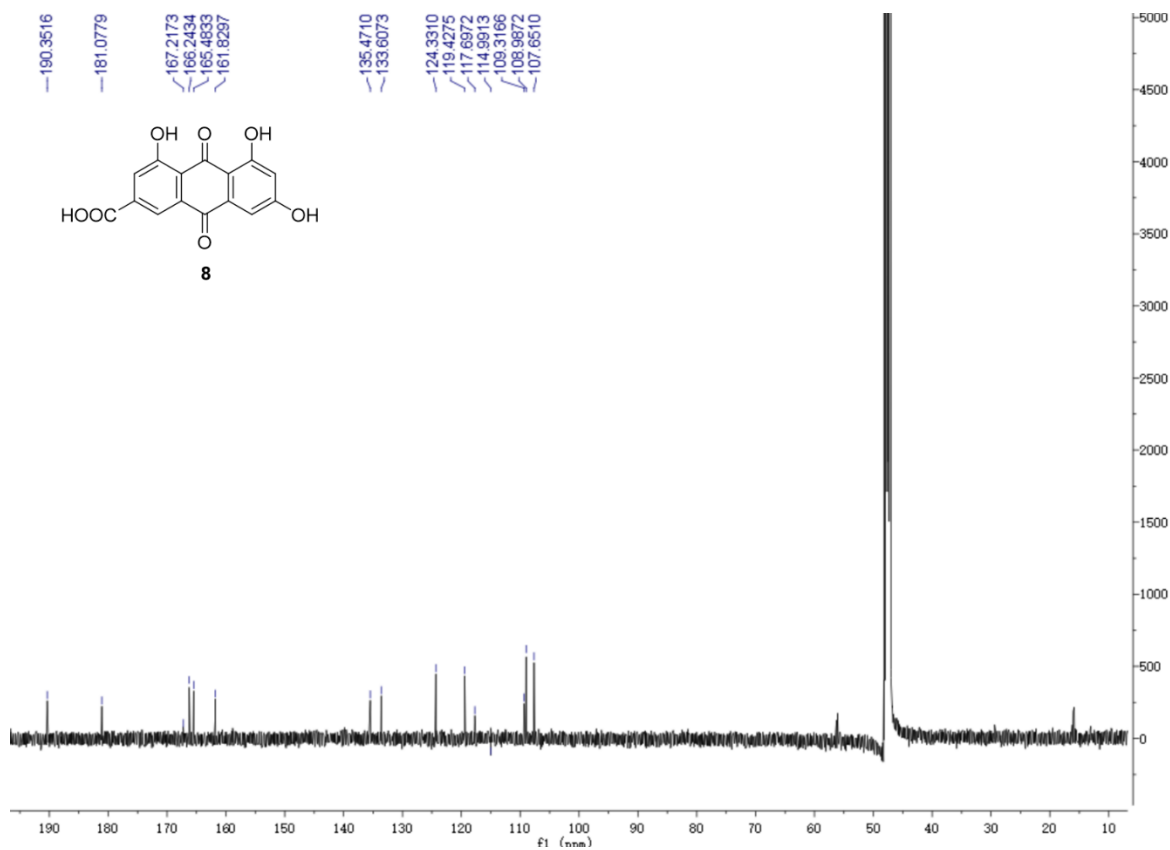Supplementary Figure S49. <sup>13</sup>C NMR (125 MHz, CD<sub>3</sub>OD) spectrum of compound **8**.

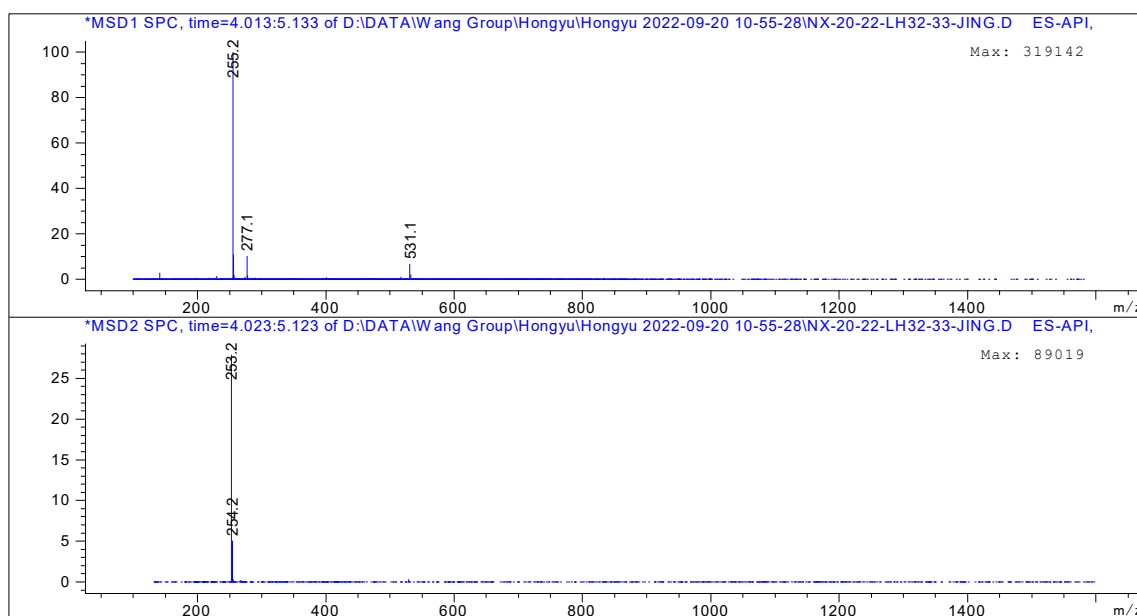

**Supplementary Figure S50.** (+) and (–)-ESI-MS of compound **9**.

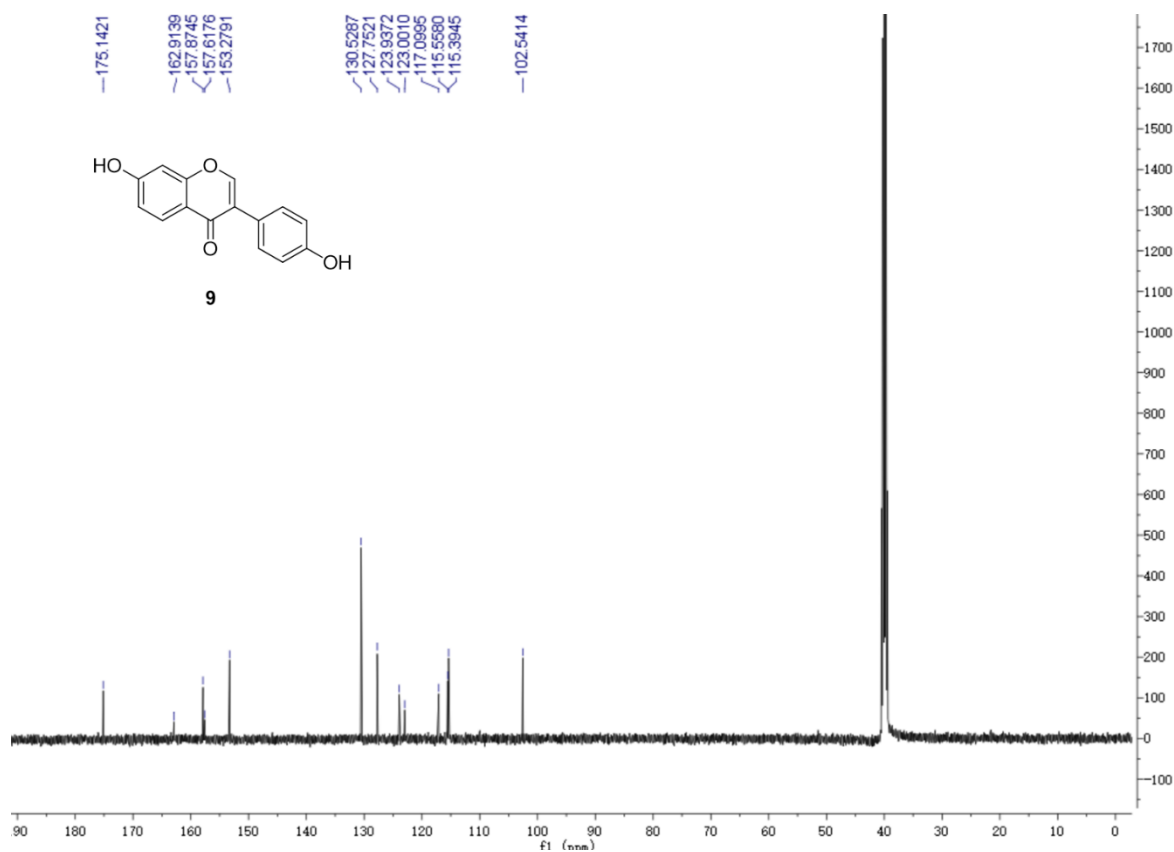

**Supplementary Figure S51.**  $^{13}\text{C}$  NMR (125 MHz,  $\text{DMSO}-d_6$ ) spectrum of compound **9**.

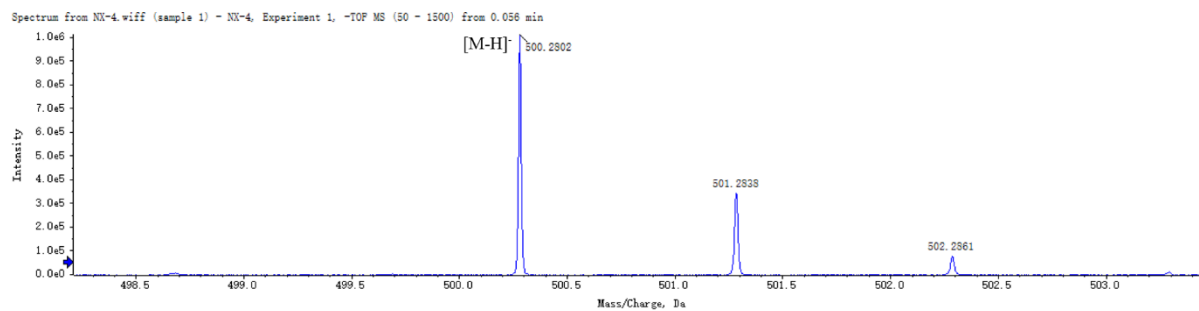

**Supplementary Figure S52.** (-)-HRESI-MS of compound **10**.

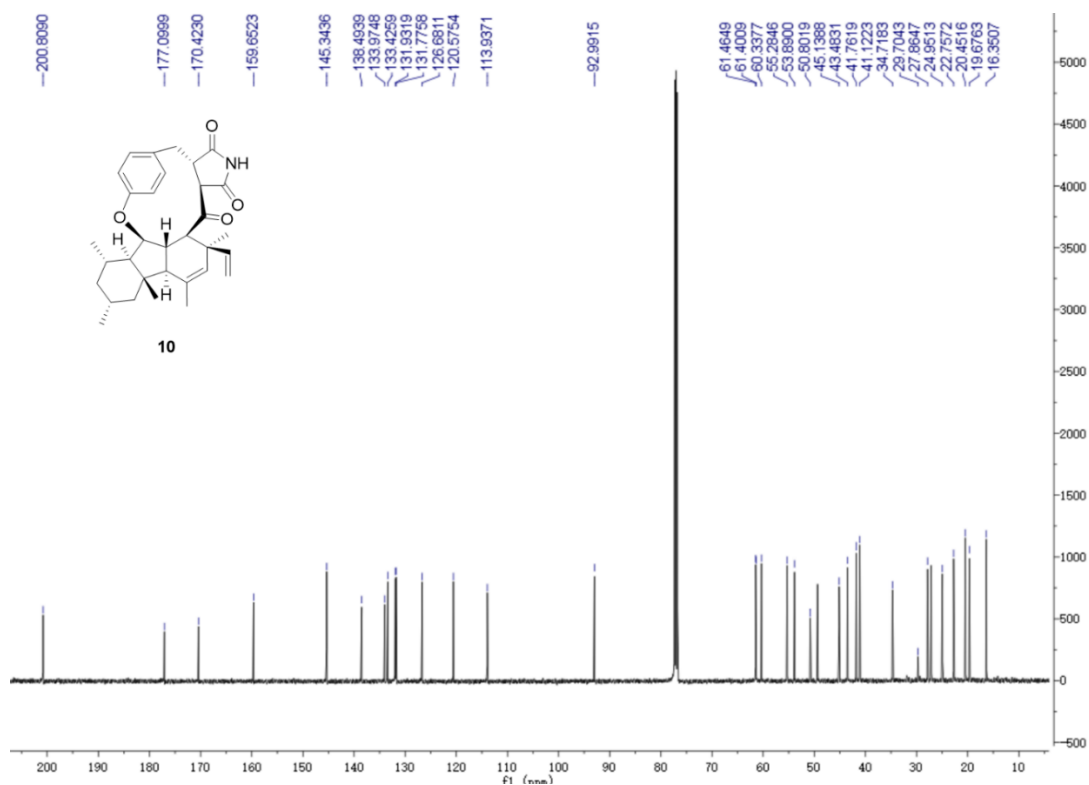

**Supplementary Figure S53.** <sup>13</sup>C NMR (125 MHz, CD<sub>3</sub>OD) spectrum of compound **10**.

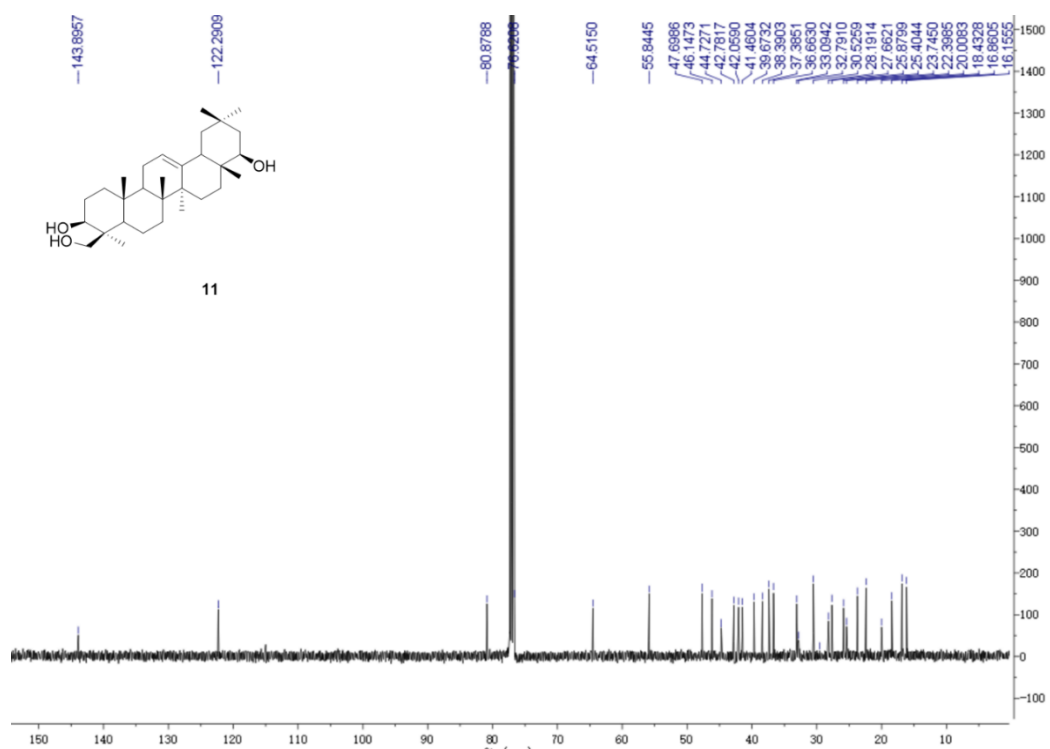

Supplementary Figure S54.  $^{13}\text{C}$  NMR (125 MHz,  $\text{CD}_3\text{Cl}_3$ ) spectrum of compound 11.

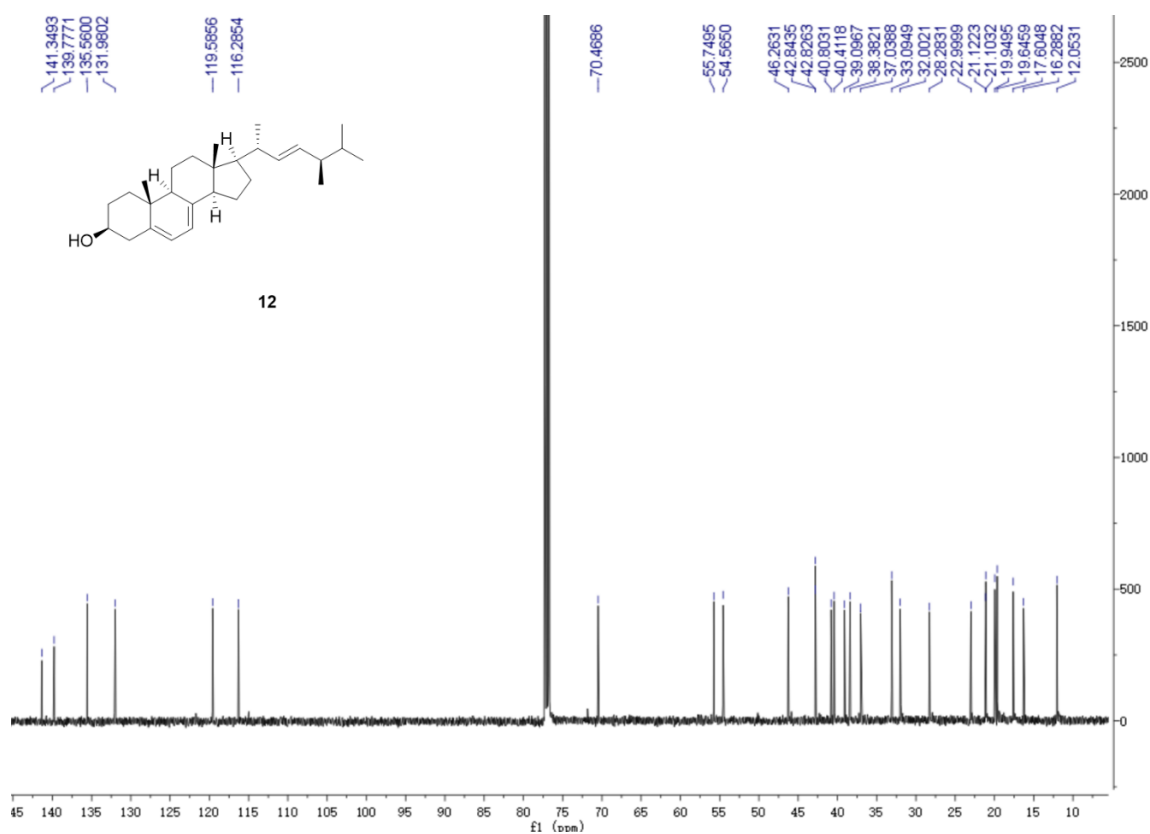

Supplementary Figure S55.  $^{13}\text{C}$  NMR (125 MHz,  $\text{CD}_3\text{Cl}_3$ ) spectrum of compound 12.

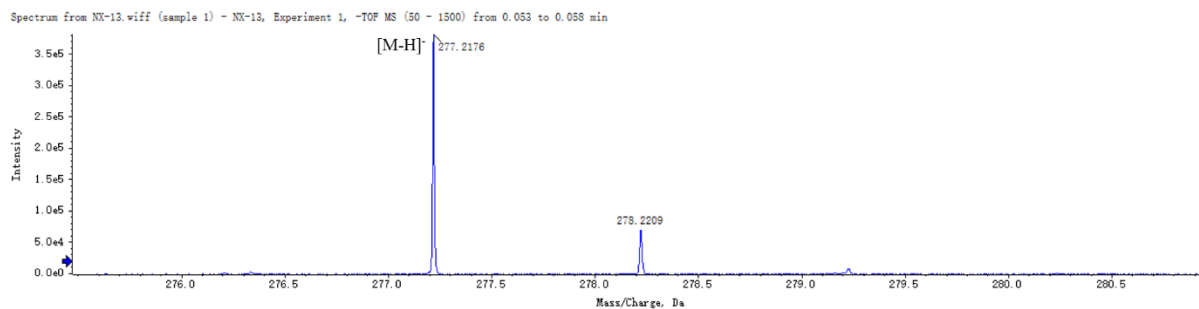

**Supplementary Figure S56.** (-)-HRESI-MS of compound **13**.

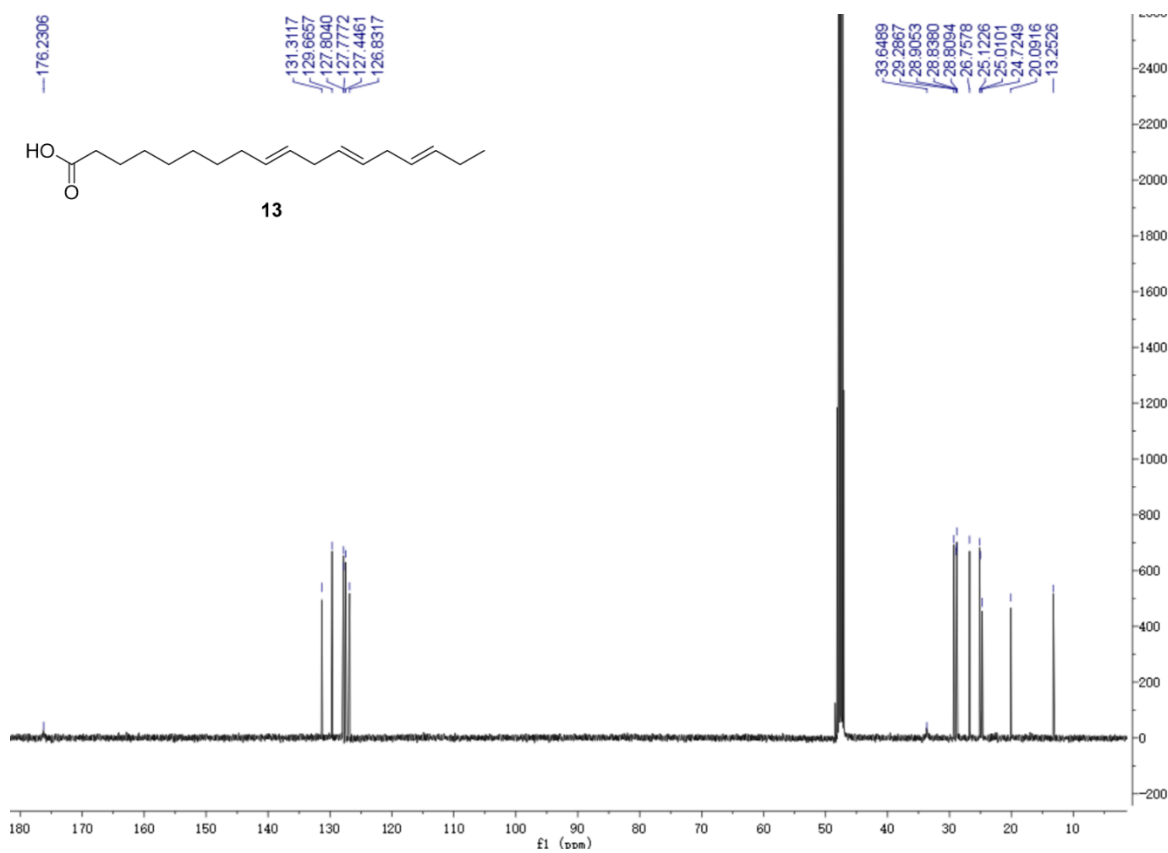

**Supplementary Figure S57.** <sup>13</sup>C NMR (125 MHz, CD<sub>3</sub>OD) spectrum of compound **13**.

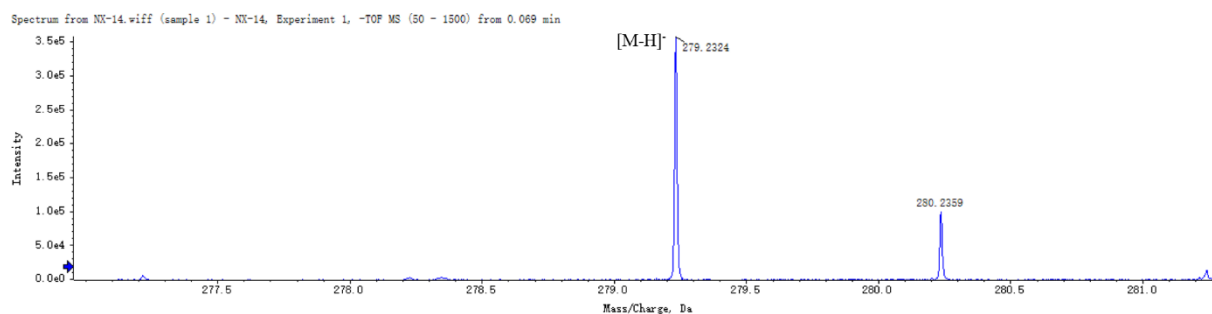

**Supplementary Figure S58.** (–)-HRESI-MS of compound **14**.

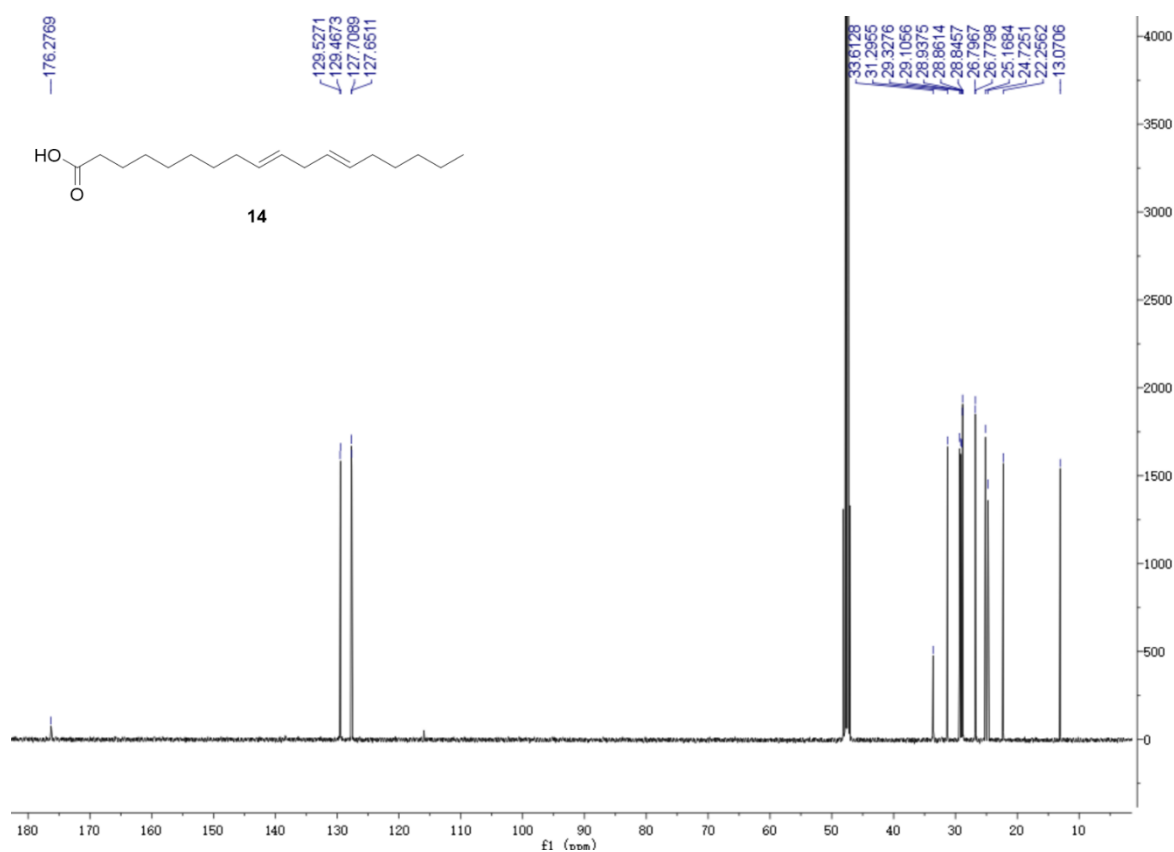

**Supplementary Figure S59.** <sup>13</sup>C NMR (125 MHz, CD<sub>3</sub>OD) spectrum of compound **14**.

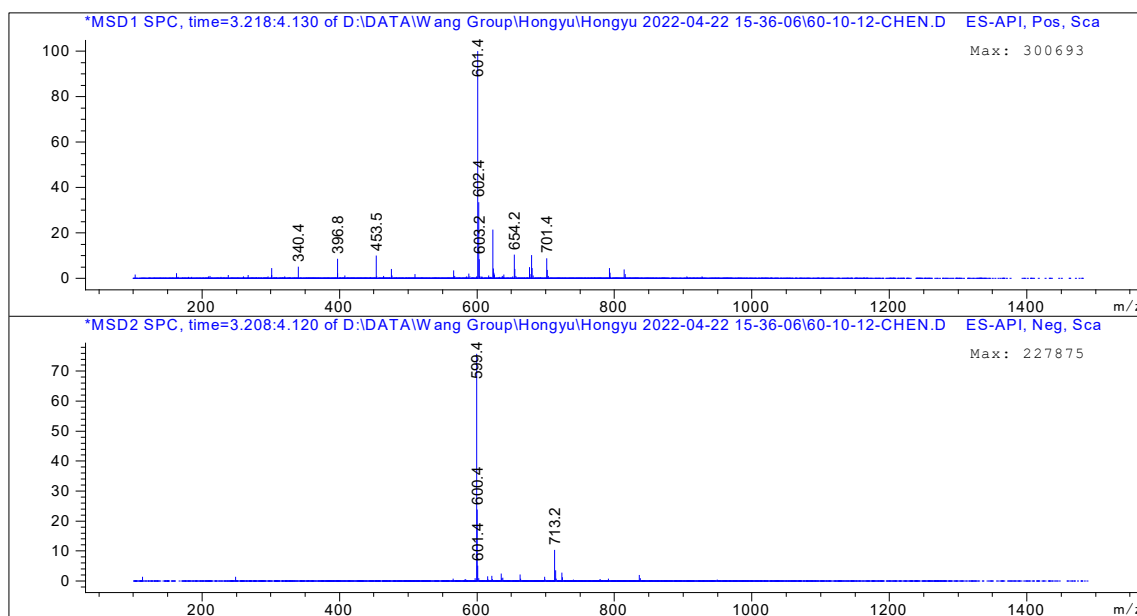Supplementary Figure S60. (+) and (-)-ESI-MS of compound **15**.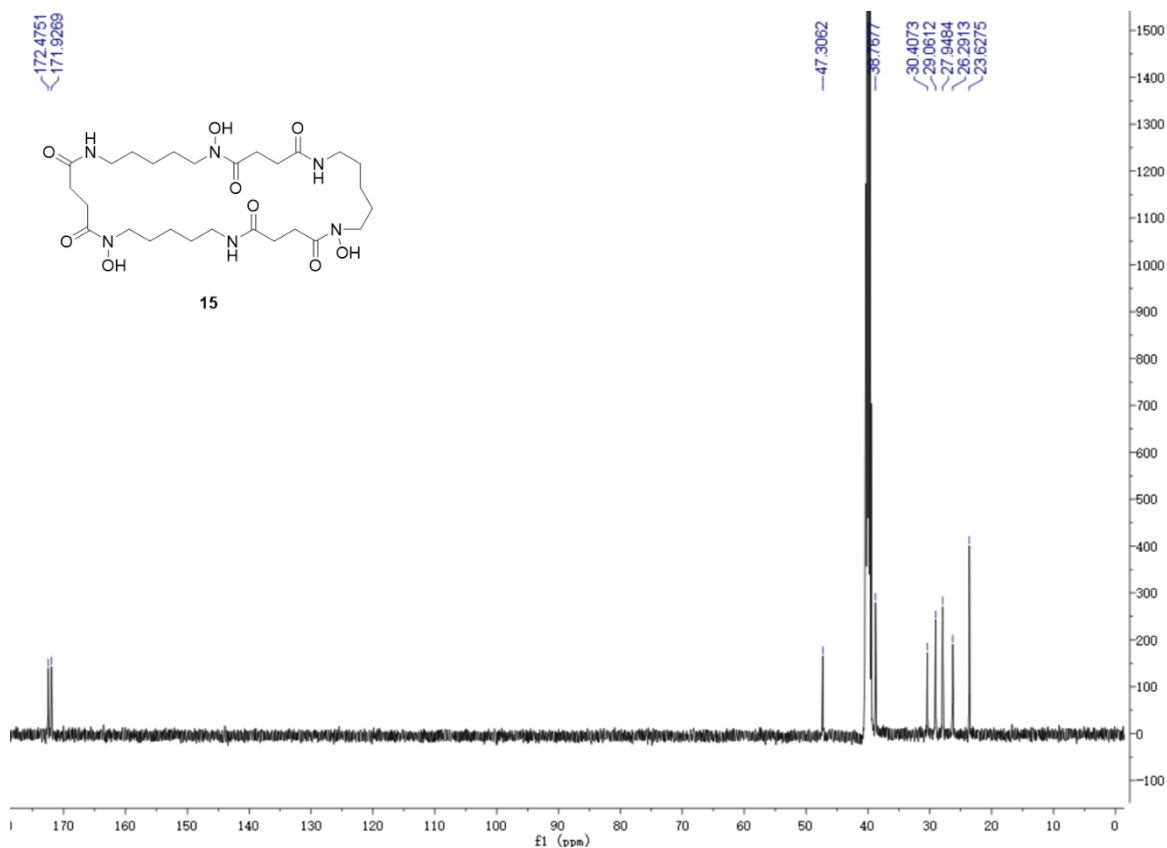Supplementary Figure S61.  $^{13}\text{C}$  NMR (125 MHz,  $\text{DMSO}-d_6$ ) spectrum of compound **15**.

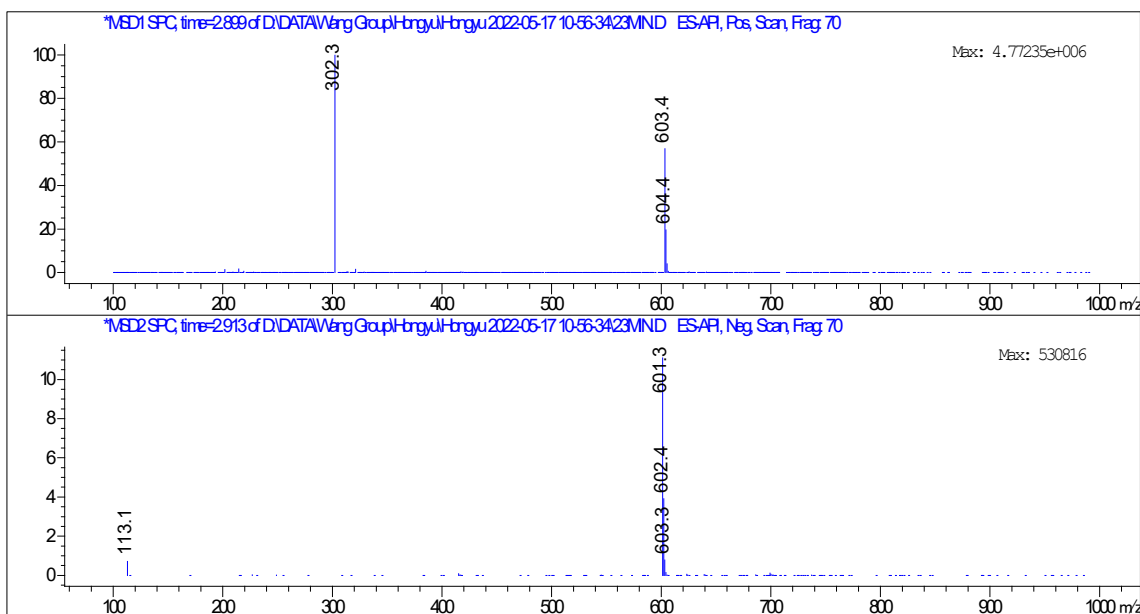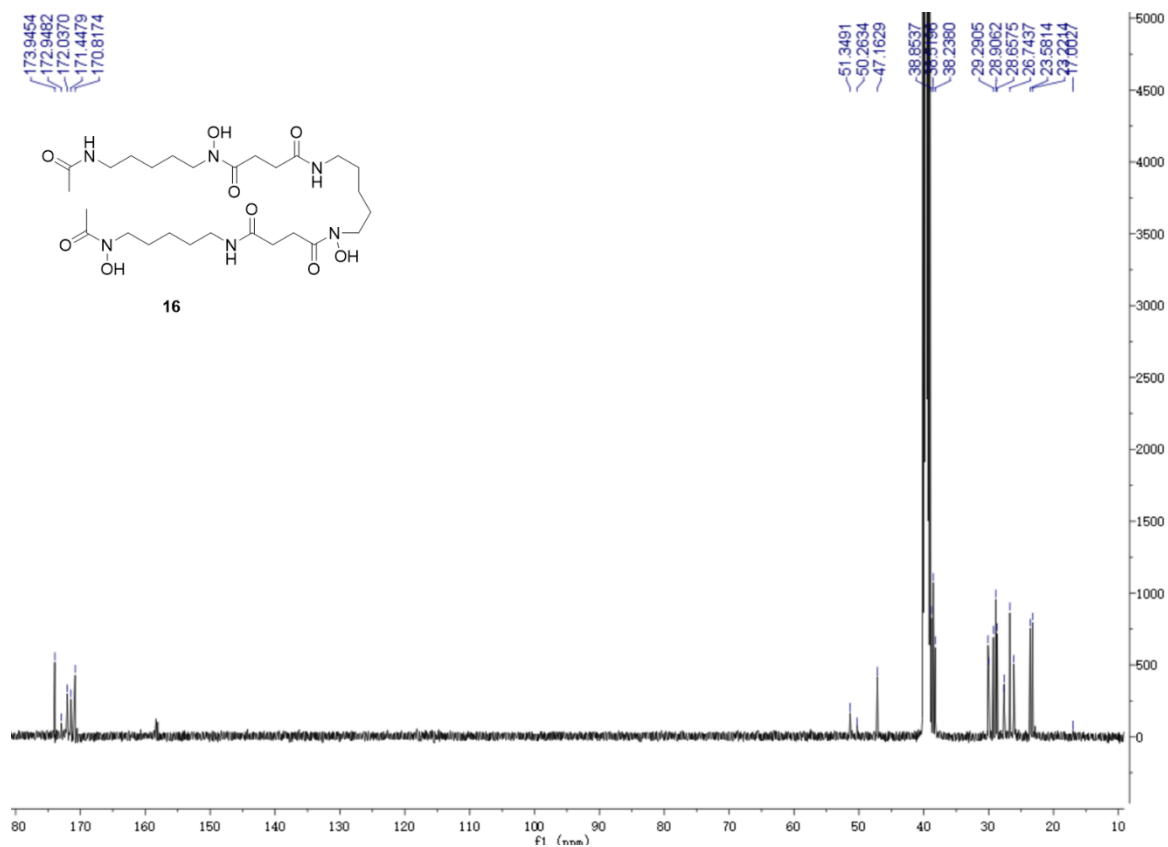

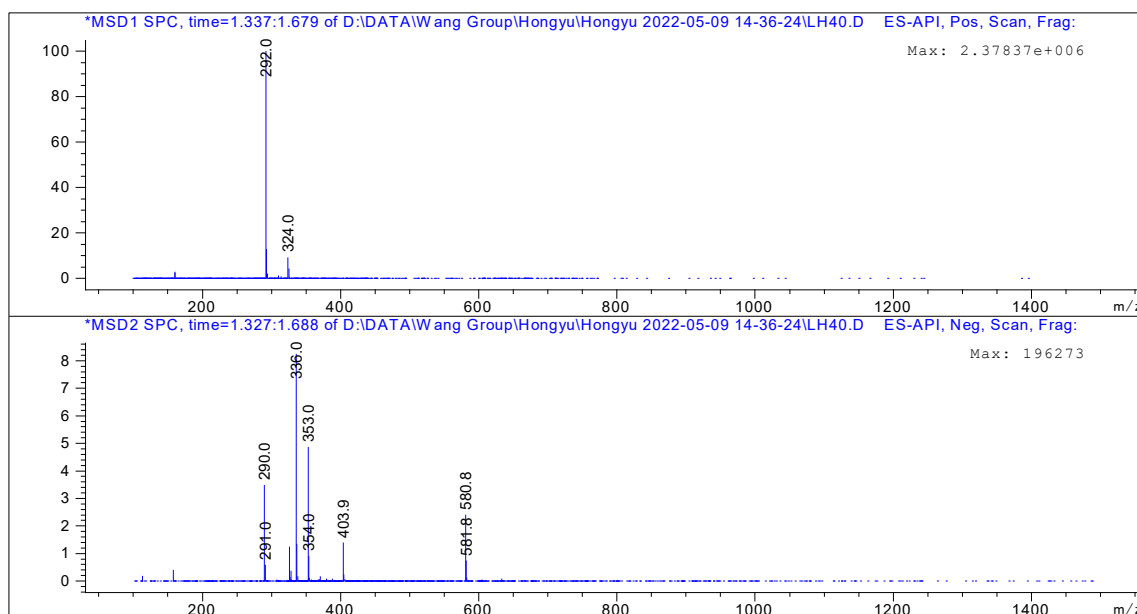

Supplementary Figure S64. (+) and (-)-ESI-MS of compound 17.

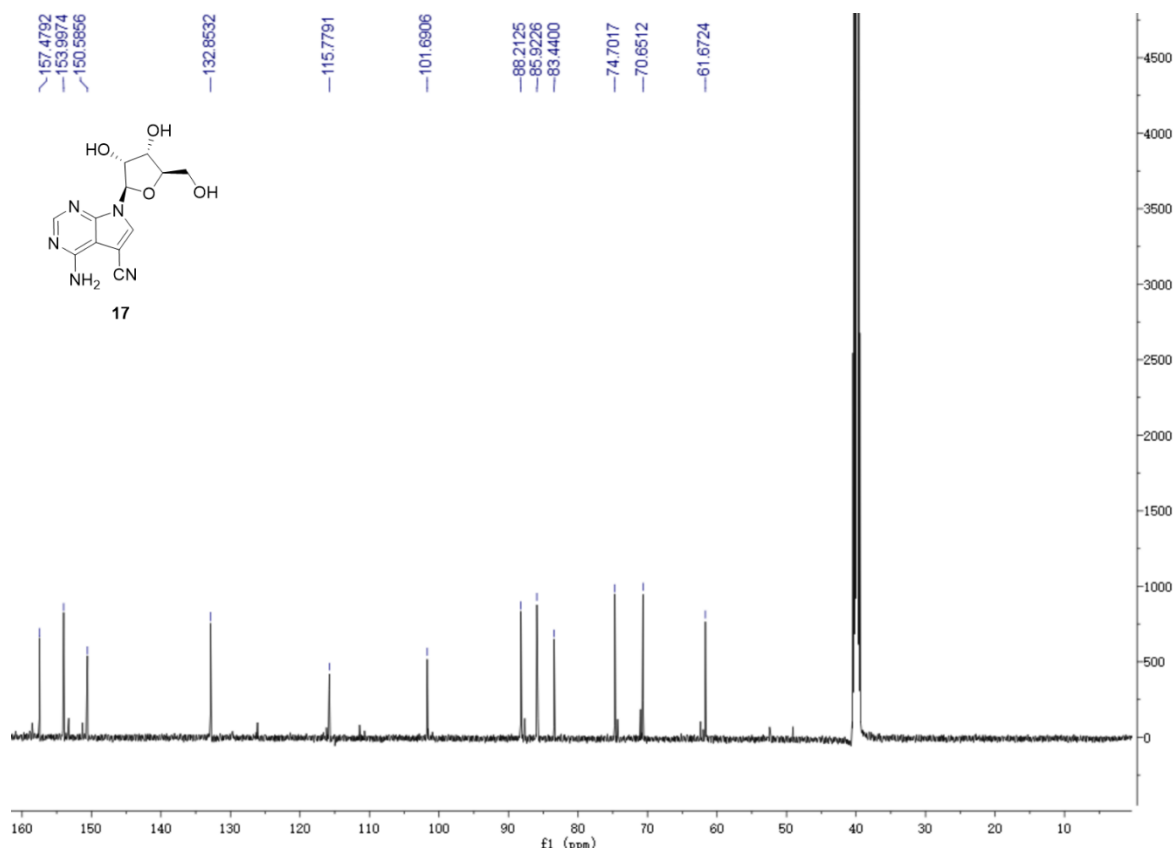Supplementary Figure S65.  $^{13}\text{C}$  NMR (125 MHz,  $\text{DMSO}-d_6$ ) spectrum of compound 17.

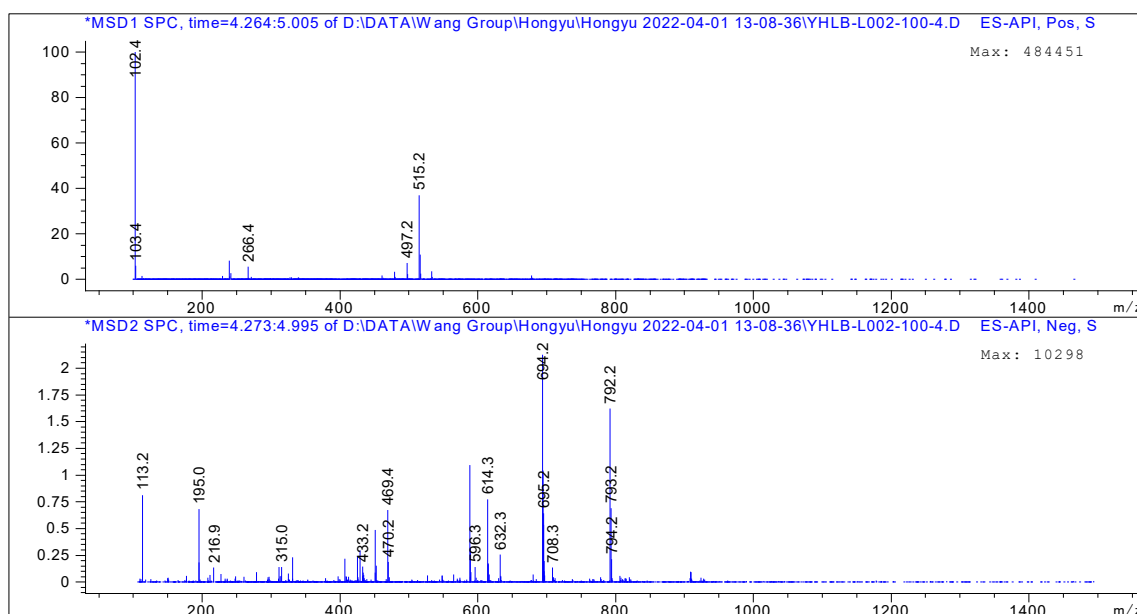

Supplementary Figure S66. (+) and (-)-ESI-MS of compound **18**.

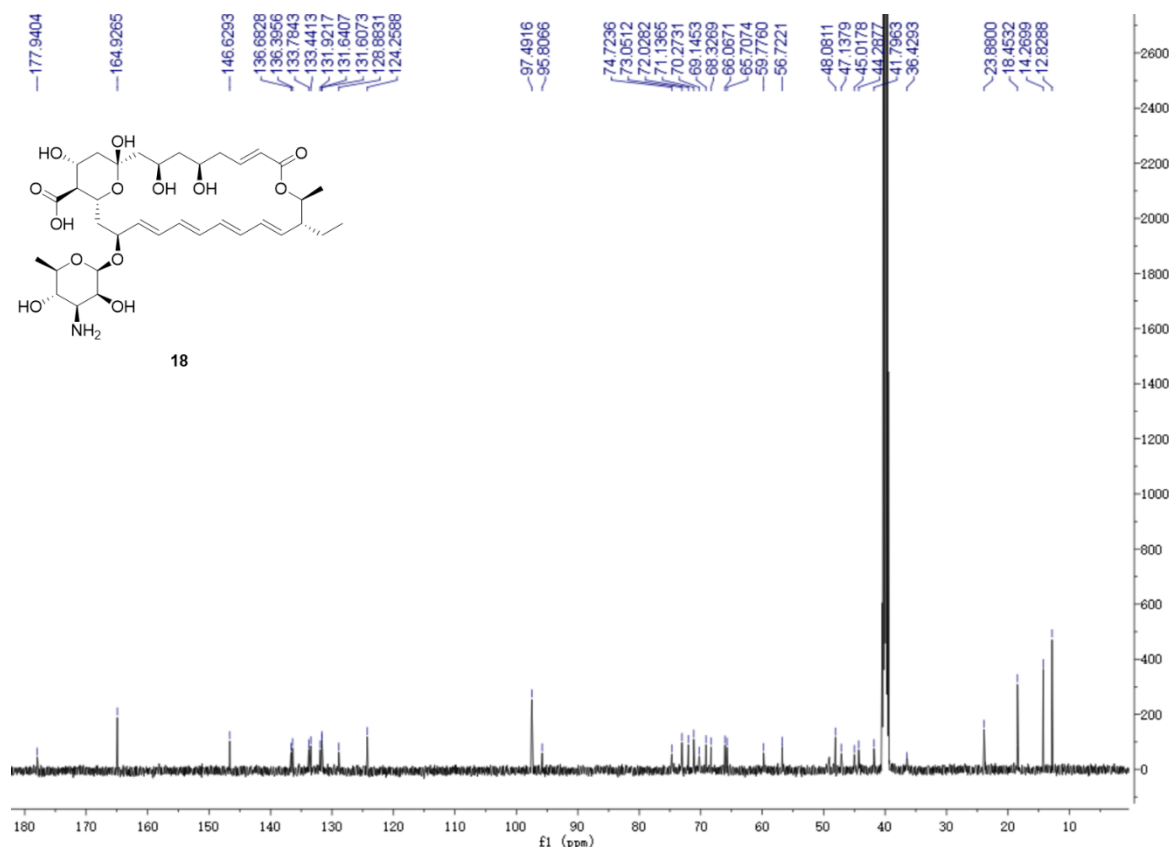

Supplementary Figure S67.  $^{13}\text{C}$  NMR (125 MHz,  $\text{DMSO}-d_6$ ) spectrum of compound **18**.

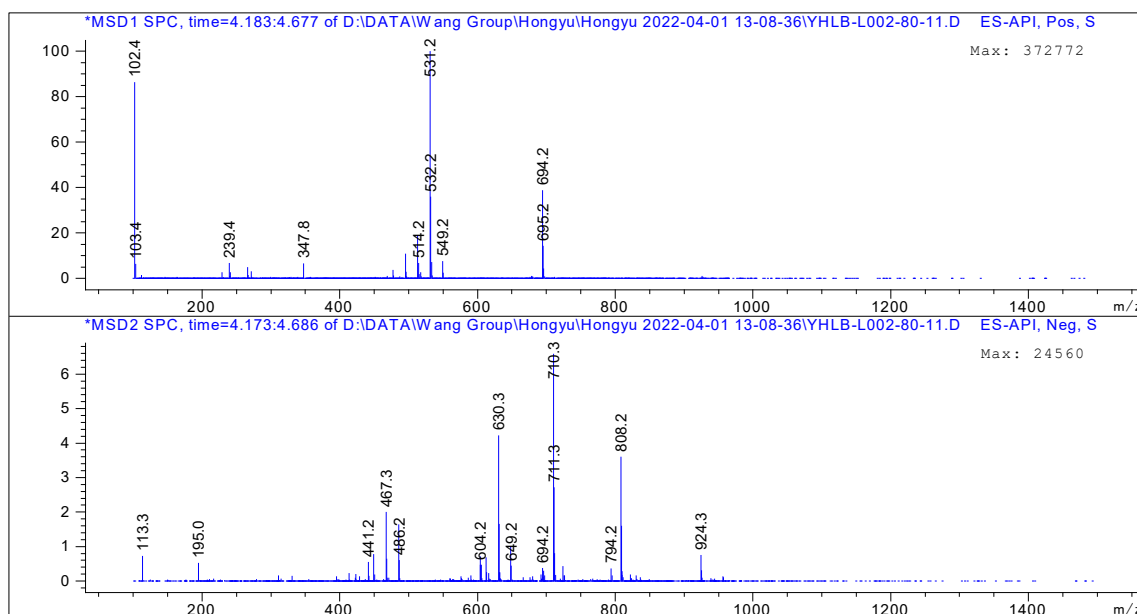Supplementary Figure S68. (+) and (-)-ESI-MS of compound **19**.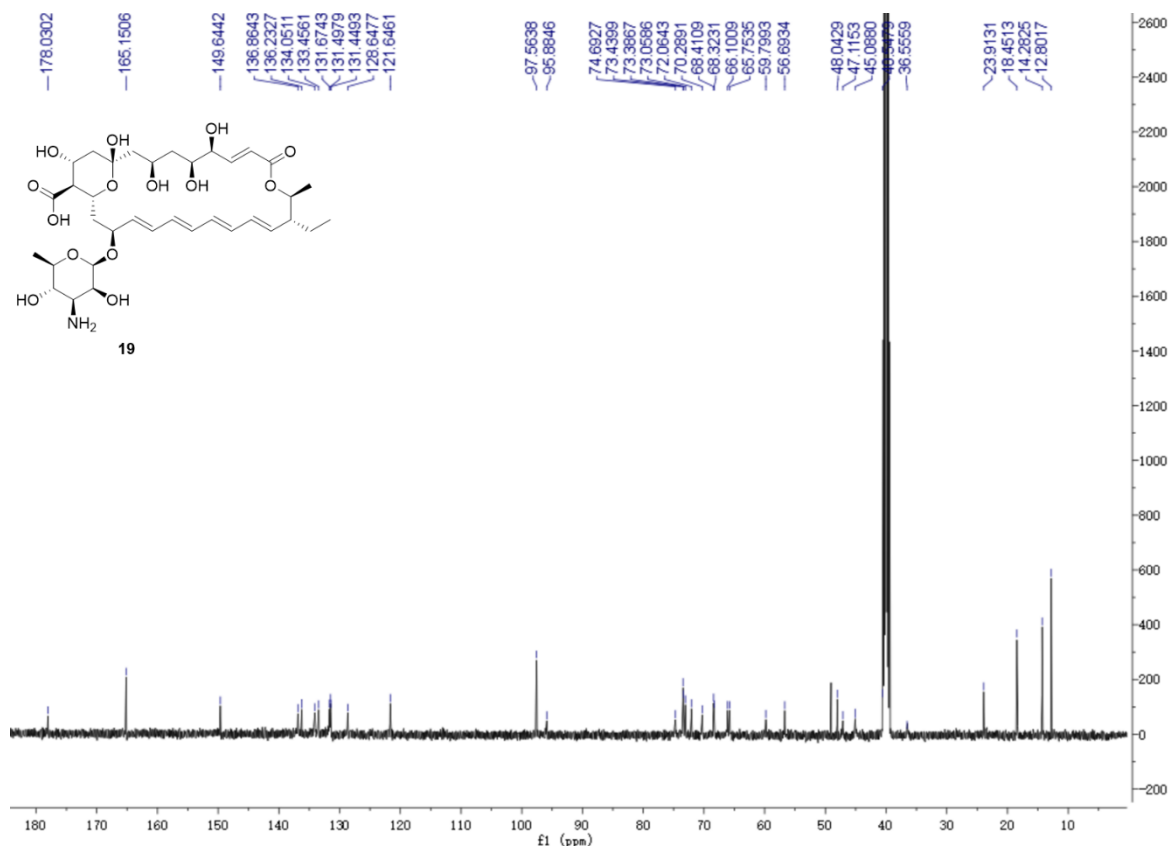Supplementary Figure S69.  $^{13}\text{C}$  NMR (125 MHz,  $\text{DMSO}-d_6$ ) spectrum of compound **19**.

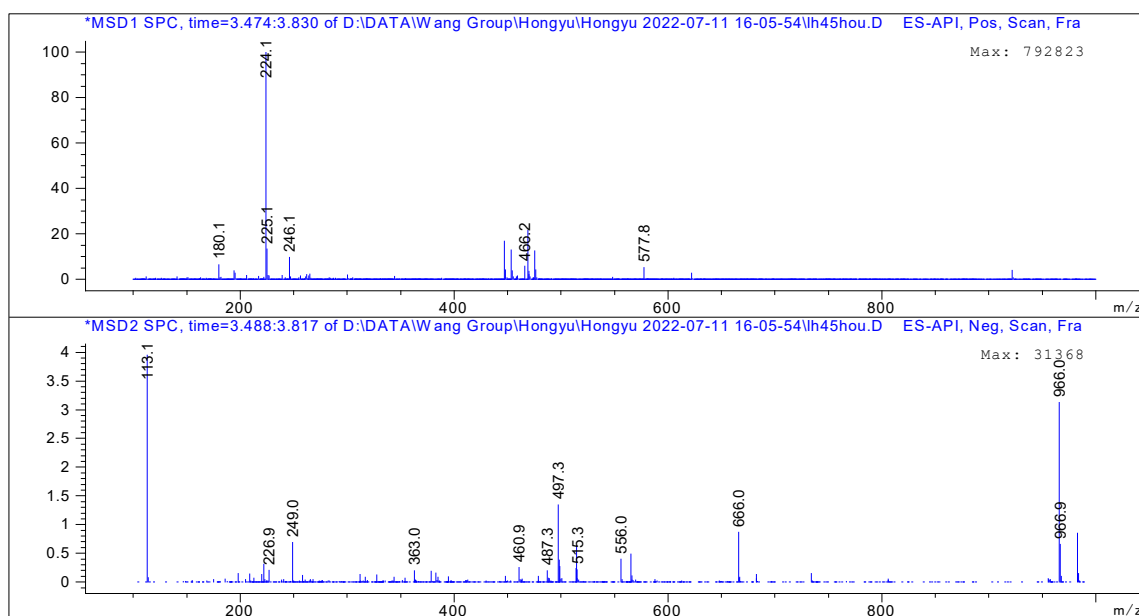

**Supplementary Figure S70.** (+) and (-)-ESI-MS of compound **20**.

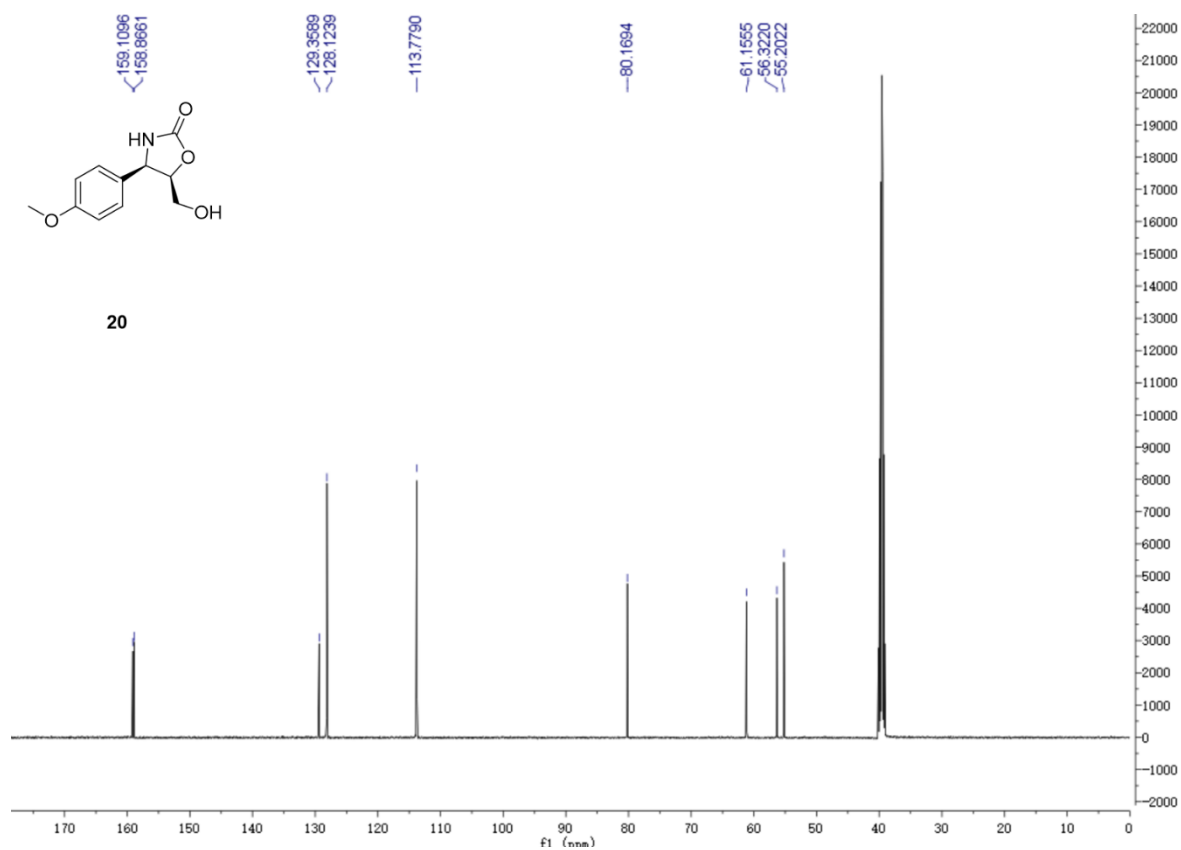

**Supplementary Figure S71.**  $^{13}\text{C}$  NMR (125 MHz,  $\text{DMSO}-d_6$ ) spectrum of compound **20**.

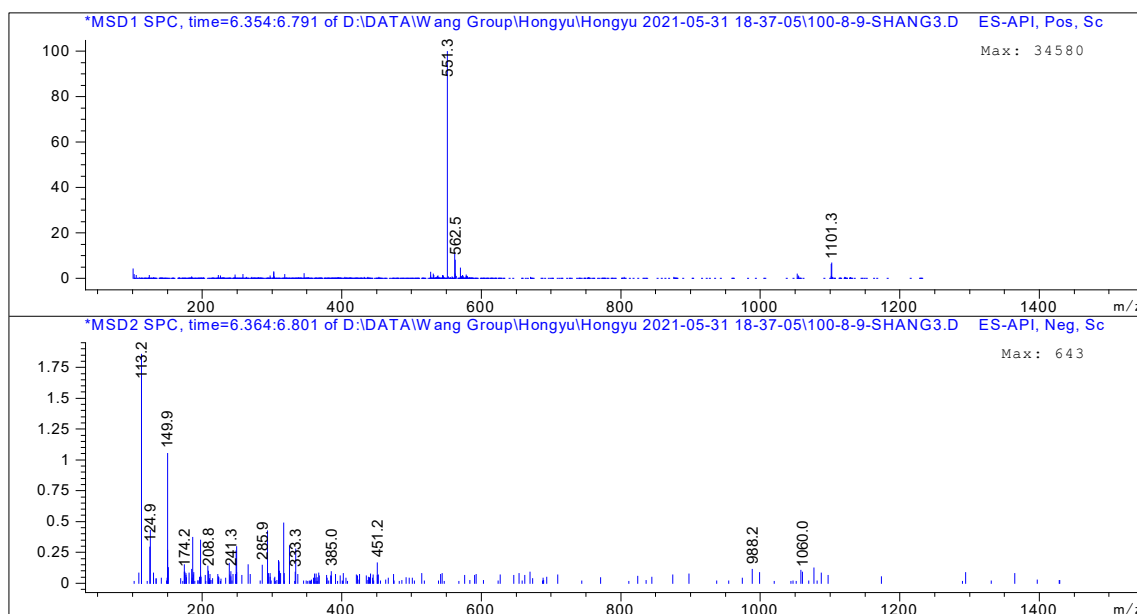

**Supplementary Figure S72.** (+) and (-)-ESI-MS of compound **21**.

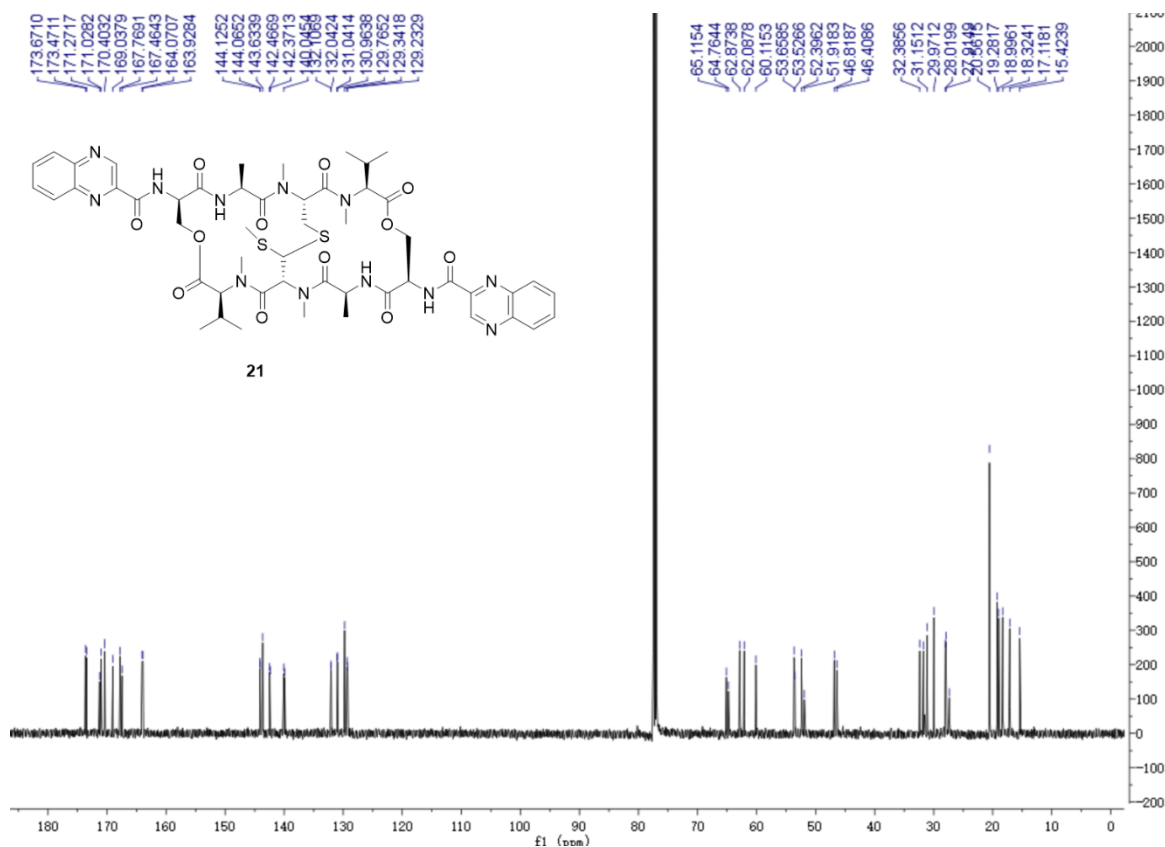

**Supplementary Figure S73.**  $^{13}\text{C}$  NMR (125 MHz,  $\text{CDCl}_3$ ) spectrum of compound **21**.

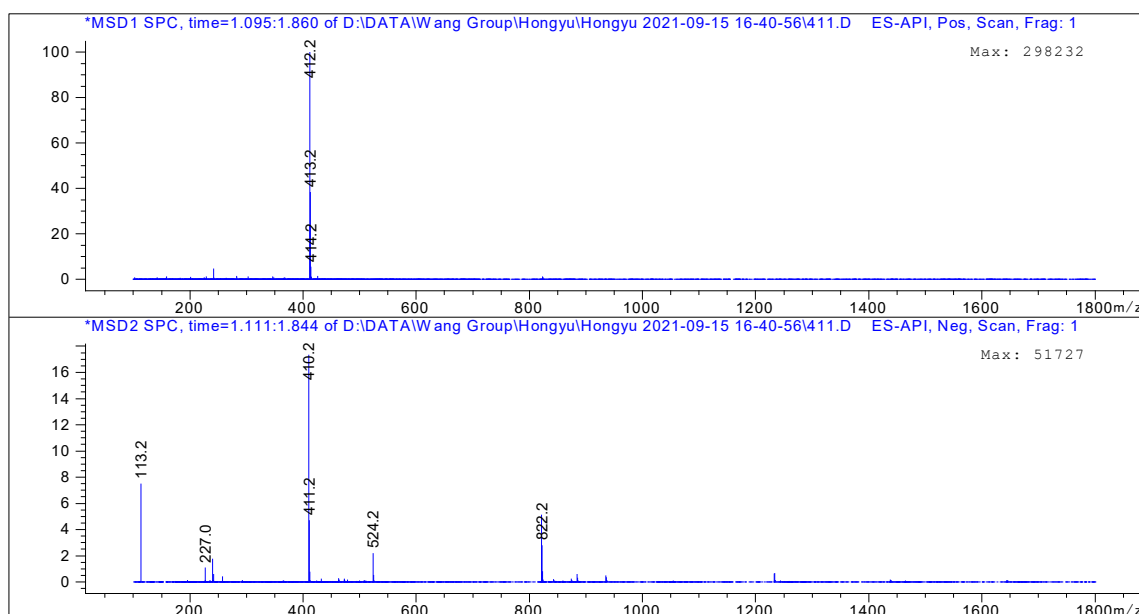

**Supplementary Figure S74.** (+) and (-)-ESI-MS of compound **22**.

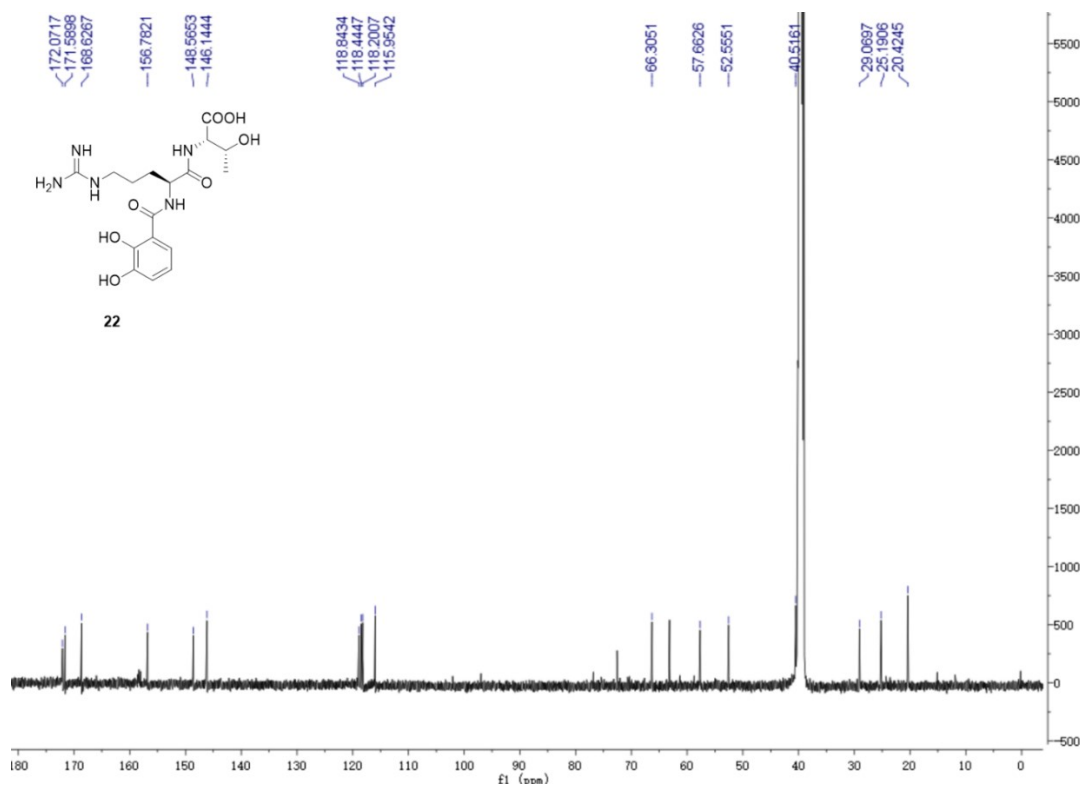

**Supplementary Figure S75.**  $^{13}\text{C}$  NMR (125 MHz,  $\text{DMSO}-d_6$ ) spectrum of compound **22**.

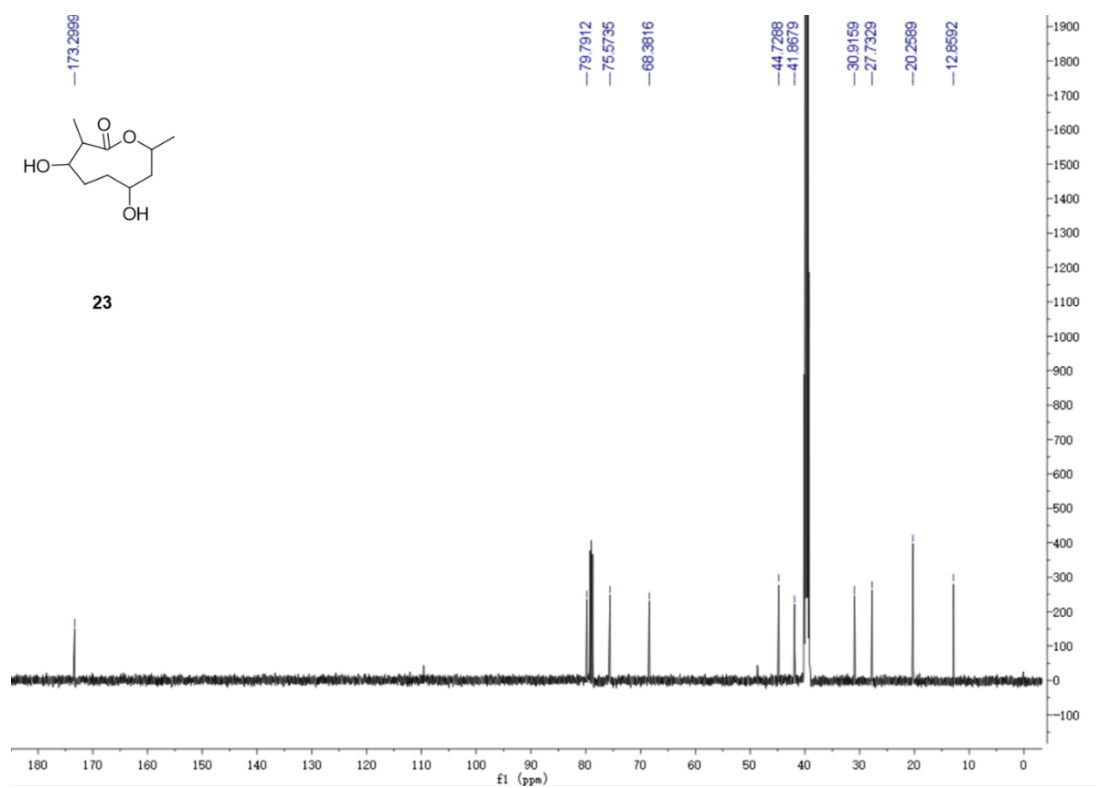

Supplementary Figure S76.  $^{13}\text{C}$  NMR (125 MHz, DMSO- $d_6$ ) spectrum of compound **23**.

## 1.2 Supplementary Tables

**Supplementary Table S1.** Phylogenetic analyses of 124 endophytic strains from *Achyranthes bidentata*.

| NO. | Strains | Parts | Closest sequences by BlastN                                         | Percent Identity | Genbank accession |
|-----|---------|-------|---------------------------------------------------------------------|------------------|-------------------|
| 1   | NX-R-1  | Root  | <i>Streptomyces triostinicus</i>                                    | 100.00%          | OQ438164          |
| 2   | NX-R-2  | Root  | <i>Streptomyces manipurensis</i>                                    | 99.93%           | OQ438165          |
| 3   | NX-R-3  | Root  | <i>Streptomyces</i> sp. CPE338                                      | 100.00%          | OQ438166          |
| 4   | NX-R-4  | Root  | <i>Streptomyces paradoxus</i>                                       | 96.61%           | OQ438167          |
| 5   | NX-R-5  | Root  | Same as 45                                                          | -                | -                 |
| 6   | NX-R-6  | Root  | <i>Streptomyces flavogriseus</i>                                    | 99.93%           | OQ438168          |
| 7   | NX-R-7  | Root  | <i>Bacillus thuringiensis</i>                                       | 99.93%           | OQ438169          |
| 8   | NX-R-8  | Root  | <i>Streptomyces</i> sp.                                             | 98.04%           | OQ438170          |
| 9   | NX-R-9  | Root  | <i>Streptomyces phaeovorticillatus</i> subsp. <i>takatsukiensis</i> | 98.24%           | OQ438171          |
| 10  | NX-R-10 | Root  | <i>Streptomyces collinus</i>                                        | 99.93%           | OQ438172          |
| 11  | NX-R-11 | Root  | <i>Streptomyces</i> sp.                                             | 99.86%           | OQ438173          |
| 12  | NX-R-12 | Root  | <i>Streptomyces</i> sp.                                             | 99.93%           | OQ438174          |
| 13  | NX-R-13 | Root  | <i>Streptomyces</i> sp. X2-21                                       | 99.93%           | OQ438175          |
| 14  | NX-R-14 | Root  | Same as 16                                                          | -                | -                 |
| 15  | NX-R-15 | Root  | <i>Streptomyces</i> sp. MG62                                        | 99.72%           | OQ438176          |
| 16  | NX-R-16 | Root  | <i>Streptomyces sporovirgulis</i>                                   | 99.72%           | OQ438177          |
| 17  | NX-R-17 | Root  | <i>Streptomyces</i> sp.                                             | 95.07%           | OQ438178          |
| 18  | NX-R-18 | Root  | <i>Streptomyces</i> sp.                                             | 99.81%           | OQ438179          |
| 19  | NX-R-19 | Root  | <i>Streptomyces chartreusis</i>                                     | 96.33%           | OQ438180          |
| 20  | NX-R-20 | Root  | <i>Streptomyces cadmiisoli</i>                                      | 99.93%           | OQ438181          |
| 21  | NX-R-21 | Root  | <i>Bacillus anthracis</i>                                           | 100.00%          | OQ438182          |
| 22  | NX-R-22 | Root  | <i>Streptomyces</i> sp. RM395                                       | 100.00%          | OQ438183          |
| 23  | NX-R-23 | Root  | <i>Streptomyces phaeochromogenes</i>                                | 99.93%           | OQ438184          |
| 24  | NX-R-24 | Root  | <i>Streptomyces halstedii</i>                                       | 99.79%           | OQ438185          |
| 25  | NX-R-25 | Root  | <i>Streptomyces</i> sp.                                             | 98.72%           | OQ438186          |
| 26  | NX-R-26 | Root  | <i>Streptomyces canus</i>                                           | 99.72%           | OQ438187          |
| 27  | NX-R-27 | Root  | <i>Streptomyces</i> sp. SOK6/25-05                                  | 99.93%           | OQ438188          |
| 28  | NX-R-28 | Root  | <i>Streptomyces canus</i>                                           | 99.93%           | OQ438189          |
| 29  | NX-R-29 | Root  | <i>Streptomyces</i> sp. SOK6/25-05                                  | 99.93%           | OQ438190          |
| 30  | NX-R-30 | Root  | <i>Actinobacteria</i> bacterium                                     | 100.00%          | OQ438191          |
| 31  | NX-R-31 | Root  | <i>Streptomyces canus</i>                                           | 99.86%           | OQ438192          |
| 32  | NX-R-32 | Root  | <i>Streptomyces</i> sp. GLY-P2                                      | 99.39%           | OQ438193          |
| 33  | NX-R-33 | Root  | <i>Streptomyces</i> sp.                                             | 97.43%           | OQ438194          |
| 34  | NX-R-34 | Root  | <i>Streptomyces parvus</i>                                          | 99.86%           | OQ438195          |
| 35  | NX-R-35 | Root  | <i>Streptomyces violascens</i>                                      | 100.00%          | OQ438196          |
| 36  | NX-R-36 | Root  | <i>Streptomyces flavogriseus</i>                                    | 99.93%           | OQ438197          |
| 37  | NX-R-37 | Root  | <i>Streptomyces</i> sp. Sn-13                                       | 99.86%           | OQ438198          |
| 38  | NX-R-38 | Root  | <i>Streptomyces flavogriseus</i>                                    | 99.93%           | OQ438199          |
| 39  | NX-R-39 | Root  | <i>Streptomyces canus</i>                                           | 100.00%          | OQ438200          |
| 40  | NX-R-40 | Root  | <i>Streptomyces beijiangensis</i>                                   | 99.81%           | OQ438201          |
| 41  | NX-R-41 | Root  | <i>Streptomyces phaeochromogenes</i>                                | 99.71%           | OQ438202          |
| 42  | NX-R-42 | Root  | <i>Streptomyces</i> sp.                                             | 100.00%          | OQ438203          |
| 43  | NX-R-43 | Root  | <i>Streptomyces tauricus</i>                                        | 100.00%          | OQ438204          |
| 44  | NX-R-44 | Root  | <i>Streptomyces</i> sp. X1-2                                        | 99.66%           | OQ438205          |
| 45  | NX-R-45 | Root  | <i>Streptomyces</i> sp.                                             | 99.59%           | OQ438206          |
| 46  | NX-R-46 | Root  | <i>Rhodococcus</i> sp. 7-181                                        | 99.93%           | OQ438207          |

|    |         |      |                                        |         |          |
|----|---------|------|----------------------------------------|---------|----------|
| 47 | NX-R-47 | Root | <i>Streptomyces tauricus</i>           | 100.00% | OQ438208 |
| 48 | NX-R-48 | Root | <i>Bacillus thuringiensis</i>          | 99.93%  | OQ438209 |
| 49 | NX-R-49 | Root | <i>Bacillus cereus</i>                 | 99.93%  | OQ438210 |
| 50 | NX-R-50 | Root | <i>Streptomyces parvus</i>             | 99.79%  | OQ438211 |
| 51 | NX-R-51 | Root | <i>Streptomyces</i> sp.                | 99.37%  | OQ438212 |
| 52 | NX-R-52 | Root | <i>Streptomyces</i> sp.                | 99.93%  | OQ438213 |
| 53 | NX-R-53 | Root | <i>Streptomyces</i> sp.                | 100.00% | OQ438214 |
| 54 | NX-R-54 | Root | <i>Streptomyces</i> sp. SOK6/25-05     | 100.00% | OQ438215 |
| 55 | NX-R-55 | Root | <i>Streptomyces</i> sp.                | 99.93%  | OQ438216 |
| 56 | NX-R-56 | Root | <i>Streptomyces manipurensis</i>       | 99.86%  | OQ438217 |
| 57 | NX-R-57 | Root | <i>Streptomyces canus</i>              | 99.79%  | OQ438218 |
| 58 | NX-R-58 | Root | <i>Streptomyces collinus</i>           | 100.00% | OQ438219 |
| 59 | NX-R-59 | Root | <i>Streptomyces microflavus</i>        | 99.86%  | OQ438220 |
| 60 | NX-R-60 | Root | <i>Streptomyces anulatus</i>           | 99.93%  | OQ438221 |
| 61 | NX-R-61 | Root | <i>Streptomyces manipurensis</i>       | 99.93%  | OQ438222 |
| 62 | NX-R-62 | Root | <i>Streptomyces</i> sp.                | 100.00% | OQ438223 |
| 63 | NX-R-63 | Root | <i>Streptomyces</i> sp.                | 99.93%  | OQ438224 |
| 64 | NX-R-64 | Root | <i>Streptomyces collinus</i>           | 100.00% | OQ438225 |
| 65 | NX-R-65 | Root | <i>Streptomyces</i> sp. CPE338         | 100.00% | OQ438226 |
| 66 | NX-R-66 | Root | <i>Streptomyces</i> sp. GLY-P2         | 99.86%  | OQ438227 |
| 67 | NX-R-67 | Root | <i>Nocardia</i> sp. 30903              | 99.93%  | OQ438228 |
| 68 | NX-R-68 | Root | <i>Streptomyces</i> sp. YRA166         | 98.94%  | OQ438229 |
| 69 | NX-R-69 | Root | <i>Streptomyces</i> sp. A333 Ydz-QZ    | 100.00% | OQ438230 |
| 70 | NX-R-70 | Root | <i>Nocardia asteroides</i>             | 100.00% | OQ438231 |
| 71 | NX-R-71 | Root | <i>Bacillus cereus</i>                 | 100.00% | OQ438232 |
| 72 | NX-R-72 | Root | <i>Streptomyces</i> sp. 0616206        | 99.86%  | OQ438233 |
| 73 | NX-R-73 | Root | <i>Streptomyces neyagawaensis</i>      | 99.79%  | OQ438234 |
| 74 | NX-R-74 | Root | <i>Streptomyces anulatus</i>           | 99.86%  | OQ438235 |
| 75 | NX-L-1  | Leaf | <i>Streptomyces</i> sp. NBRC 3111      | 99.93%  | OQ438236 |
| 76 | NX-L-2  | Leaf | <i>Streptomyces</i> sp. X4-1           | 99.64%  | OQ438237 |
| 77 | NX-L-3  | Leaf | <i>Actinobacteria</i> bacterium        | 99.26%  | OQ438238 |
| 78 | NX-L-4  | Leaf | <i>Streptomyces</i> sp. CPE314         | 97.31%  | OQ438239 |
| 79 | NX-L-5  | Leaf | <i>Streptomyces</i> sp. BF-9           | 99.93%  | OQ438240 |
| 80 | NX-L-6  | Leaf | <i>Streptomyces</i> sp. MM117          | 99.86%  | OQ438241 |
| 81 | NX-L-7  | Leaf | <i>Streptomyces griseolus</i>          | 99.51%  | OQ438242 |
| 82 | NX-L-8  | Leaf | <i>Streptomyces</i> sp.                | 99.93%  | OQ438243 |
| 83 | NX-L-9  | Leaf | <i>Streptomyces</i> sp.                | 99.42%  | OQ438244 |
| 84 | NX-L-10 | Leaf | <i>Streptomyces rubiginosohelvolus</i> | 99.86%  | OQ438245 |
| 85 | NX-L-11 | Leaf | <i>Streptomyces tricolor</i>           | 99.79%  | OQ438246 |
| 86 | NX-L-12 | Leaf | <i>Streptomyces zaomyceticus</i>       | 99.93%  | OQ438247 |
| 87 | NX-L-13 | Leaf | <i>Streptomyces parvus</i>             | 99.72%  | OQ438248 |
| 88 | NX-L-14 | Leaf | <i>Streptomyces</i> sp.                | 98.65%  | OQ438249 |
| 89 | NX-L-15 | Leaf | <i>Streptomyces</i> sp. QZGY-A35       | 99.79%  | OQ438250 |
| 90 | NX-L-16 | Leaf | Same as 123                            | -       | -        |
| 91 | NX-L-17 | Leaf | <i>Streptomyces variabilis</i>         | 100.00% | OQ438251 |
| 92 | NX-L-18 | Leaf | <i>Streptomyces zaomyceticus</i>       | 99.93%  | OQ438252 |
| 93 | NX-L-19 | Leaf | <i>Nocardia asteroides</i>             | 100.00% | OQ438253 |
| 94 | NX-L-20 | Leaf | <i>Methylobacterium brachiatum</i>     | 99.90%  | OQ438254 |
| 95 | NX-L-21 | Leaf | <i>Bacillus cereus</i>                 | 99.16%  | OQ438255 |
| 96 | NX-L-22 | Leaf | <i>Microbacterium</i> sp. PTS2402      | 94.75%  | OQ438256 |
| 97 | NX-L-23 | Leaf | <i>Streptomyces</i> sp. STR43          | 98.75%  | OQ438257 |
| 98 | NX-L-24 | Leaf | <i>Streptomyces</i> sp.                | 99.93%  | OQ438258 |
| 99 | NX-L-25 | Leaf | <i>Streptomyces violascens</i>         | 100.00% | OQ438259 |

|     |         |             |                                     |         |          |
|-----|---------|-------------|-------------------------------------|---------|----------|
| 100 | NX-L-26 | Leaf        | <i>Streptomyces</i> sp. A160 Ydz-ZZ | 100.00% | OQ438260 |
| 101 | NX-L-27 | Leaf        | <i>Streptomyces microflavus</i>     | 99.93%  | OQ438261 |
| 102 | NX-L-28 | Leaf        | <i>Streptomyces parvus</i>          | 99.93%  | OQ438262 |
| 103 | NX-L-29 | Leaf        | <i>Streptomyces halstedii</i>       | 99.79%  | OQ438263 |
| 104 | NX-L-30 | Leaf        | <i>Streptomyces akiyoshiensis</i>   | 99.93%  | OQ438264 |
| 105 | NX-L-31 | Leaf        | <i>Streptomyces</i> sp. MM14        | 99.86%  | OQ438265 |
| 106 | NX-S-1  | Stem        | <i>Streptomyces</i> sp. E5N187      | 99.86%  | OQ438266 |
| 107 | NX-S-2  | Stem        | <i>Streptomyces</i> sp. wa22        | 98.28%  | OQ438267 |
| 108 | NX-S-3  | Stem        | <i>Streptomyces venezuelae</i>      | 99.86%  | OQ438268 |
| 109 | NX-S-4  | Stem        | <i>Streptomyces</i> sp. X54         | 99.79%  | OQ438269 |
| 110 | NX-S-5  | Stem        | <i>Streptomyces halstedii</i>       | 99.23%  | OQ438270 |
| 111 | NX-S-6  | Stem        | <i>Penicillium</i> sp.              | 99.63%  | OQ438028 |
| 112 | NX-S-7  | Stem        | <i>Nocardia asteroides</i>          | 100.00% | OQ438271 |
| 113 | NX-S-8  | Stem        | <i>Streptomyces anulatus</i>        | 99.86%  | OQ438272 |
| 114 | NX-S-9  | Stem        | <i>Streptomyces</i> sp. SM18        | 96.96%  | OQ438273 |
| 115 | NX-S-10 | Stem        | <i>Nocardia asteroides</i>          | 100.00% | OQ438274 |
| 116 | NX-S-11 | Stem        | <i>Streptomyces</i> sp.             | 98.64%  | OQ438275 |
| 117 | NX-S-12 | Stem        | <i>Streptomyces</i> sp.             | 99.86%  | OQ438276 |
| 118 | NX-S-13 | Stem        | <i>Streptomyces flavogriseus</i>    | 100.00% | OQ438277 |
| 119 | NX-S-14 | Stem        | <i>Nocardia asteroides</i>          | 100.00% | OQ438278 |
| 120 | NX-S-15 | Stem        | <i>Streptomyces</i> sp. A2-16       | 99.86%  | OQ438279 |
| 121 | NX-S-16 | Stem        | <i>Nocardia asteroides</i>          | 100.00% | OQ438280 |
| 122 | NX-S-17 | Stem        | <i>Streptomyces griseolus</i>       | 99.51%  | OQ438281 |
| 123 | NX-S-18 | Stem        | <i>Bacillus</i> sp. CSB5            | 83.70%  | OQ438282 |
| 124 | NX-AP-1 | Aerial Part | <i>Bacillus cereus</i>              | 99.86%  | OQ438283 |

(Red color: selected for further study).

**Supplementary Table S2.** Phylogenetic analyses of 13 endophytic strains from *Ainsliaea fragrans*.

| NO. | Strains     | Parts     | Closest sequences by BlastN          | Percent Identity | Genbank accession |
|-----|-------------|-----------|--------------------------------------|------------------|-------------------|
| 1   | XXTEF-R-1   | Root      | <i>Streptomyces anulatus</i>         | 99.93%           | OQ438816          |
| 2   | XXTEF-SL-1  | Stem-Leaf | <i>Streptomyces</i> sp. INBio_4506AN | 99.93%           | OQ438817          |
| 3   | XXTEF-SL-2  | Stem-Leaf | <i>Streptomyces</i> sp. SM18         | 99.93%           | OQ438818          |
| 4   | XXTEF-SL-3  | Stem-Leaf | <i>Streptomyces mucoflavus</i>       | 98.56%           | OQ438819          |
| 5   | XXTEF-SL-4  | Stem-Leaf | <i>Streptomyces mucoflavus</i>       | 98.56%           | OQ438820          |
| 6   | XXTEF-SL-5  | Stem-Leaf | <i>Streptomyces</i> sp. SM18         | 99.93%           | OQ438821          |
| 7   | XXTEF-SL-6  | Stem-Leaf | <i>Streptomyces halstedii</i>        | 99.93%           | OQ438822          |
| 8   | XXTEF-SL-7  | Stem-Leaf | <i>Streptomyces variabilis</i>       | 100.00%          | OQ438823          |
| 9   | XXTEF-SL-8  | Stem-Leaf | <i>Streptomyces</i> sp. SM18         | 99.93%           | OQ438824          |
| 10  | XXTEF-SL-9  | Stem-Leaf | <i>Streptomyces</i> sp. MJM4235      | 99.86%           | OQ438825          |
| 11  | XXTEF-SL-10 | Stem-Leaf | <i>Streptomyces mucoflavus</i>       | 98.56%           | OQ438826          |
| 12  | XXTEF-F-1   | Flower    | <i>Micromonospora chokoriensis</i>   | 99.79%           | OQ438827          |
| 13  | XXTEF-F-2   | Flower    | <i>Bacillus thuringiensis</i>        | 99.93%           | OQ438828          |

**Supplementary Table S3.** Phylogenetic analyses of 11 endophytic strains from *Artemisia capillaris*.

| NO. | Strains  | Parts       | Closest sequences by BlastN               | Percent Identity | Genbank accession |
|-----|----------|-------------|-------------------------------------------|------------------|-------------------|
| 1   | YCH-R-1  | Root        | <i>Streptomyces chartreusis</i> NRRL 3882 | 100.00%          | OQ430664          |
| 2   | YCH-L-1  | Leaf        | <i>Streptomyces zaomyceticus</i>          | 100.00%          | OQ430665          |
| 3   | YCH-AP-1 | Aerial Part | <i>Microbacterium hydrocarbonoxydans</i>  | 99.93%           | OQ430666          |
| 4   | YCH-AP-2 | Aerial Part | <i>Terribacillus goriensis</i>            | 100.00%          | OQ430667          |
| 5   | YCH-AP-3 | Aerial Part | <i>Streptomyces</i> sp.                   | 100.00%          | OQ430668          |
| 6   | YCH-AP-4 | Aerial Part | <i>Streptomyces</i> sp. A311Ydz-AH        | 99.86%           | OQ430669          |
| 7   | YCH-AP-5 | Aerial Part | <i>Staphylococcus xylosus</i>             | 99.93%           | OQ430670          |
| 8   | YCH-AP-6 | Aerial Part | <i>Streptomyces</i> sp.                   | 99.17%           | OQ430671          |
| 9   | YCH-AP-7 | Aerial Part | <i>Streptomyces</i> sp. DUT_AHX           | 99.93%           | OQ430672          |
| 10  | YCH-AP-8 | Aerial Part | <i>Streptomyces neopeptini</i>            | 99.79%           | OQ430673          |
| 11  | YCH-AP-9 | Aerial Part | <i>Streptomyces pseudovenezuelae</i>      | 99.93%           | OQ430674          |

**Supplementary Table S4.** Phylogenetic analyses of 13 endophytic strains from *Daucus carota*.

| NO. | Strains  | Parts  | Closest sequences by BlastN             | Percent Identity | Genbank accession |
|-----|----------|--------|-----------------------------------------|------------------|-------------------|
| 1   | YHLB-R-1 | Root   | <i>Streptomyces griseolus</i>           | 98.38%           | OQ438148          |
| 2   | YHLB-R-2 | Root   | <i>Streptomyces halstedii</i>           | 99.86%           | OQ438149          |
| 3   | YHLB-R-3 | Root   | <i>Streptomyces flavogriseus</i>        | 100.00%          | OQ438150          |
| 4   | YHLB-L-1 | Leaf   | <i>Methylobacterium aquaticum</i>       | 97.75%           | OQ438151          |
| 5   | YHLB-L-2 | Leaf   | <i>Streptomyces diastatochromogenes</i> | 100.00%          | OQ438152          |
| 6   | YHLB-L-3 | Leaf   | <i>Microbacterium oxydans</i>           | 94.18%           | OQ438153          |
| 7   | YHLB-L-4 | Leaf   | <i>Sphingomonas</i> sp.                 | 99.93%           | OQ438154          |
| 8   | YHLB-S-1 | Stem   | <i>Streptomyces flaveus</i>             | 99.93%           | OQ438155          |
| 9   | YHLB-S-2 | Stem   | <i>Streptomyces griseolus</i>           | 99.79%           | OQ438156          |
| 10  | YHLB-S-3 | Stem   | <i>Streptomyces flavogriseus</i>        | 100.00%          | OQ438157          |
| 11  | YHLB-F-1 | Flower | <i>Kineococcus tegulae</i>              | 99.54%           | OQ438158          |
| 12  | YHLB-F-2 | Flower | Same as 13                              | -                | -                 |
| 13  | YHLB-F-3 | Flower | <i>Methylobacterium</i> sp. N7          | 99.93%           | OQ438159          |

(Red color: selected for further study).

**Supplementary Table S5.** Phylogenetic analyses of 21 endophytic strains from *Leonurus japonicus*.

| NO. | Strains  | Parts     | Closest sequences by BlastN        | Percent Identity | Genbank accession |
|-----|----------|-----------|------------------------------------|------------------|-------------------|
| 1   | YMC-R-1  | Root      | <i>Streptomyces globisporus</i>    | 99.93%           | OQ438707          |
| 2   | YMC-R-2  | Root      | <i>Bacillus albus</i>              | 99.93%           | OQ438708          |
| 3   | YMC-R-3  | Root      | <i>Streptomyces venezuelae</i>     | 99.72%           | OQ438709          |
| 4   | YMC-R-4  | Root      | <i>Microbacterium</i> sp. SuP-E064 | 99.64%           | OQ438710          |
| 5   | YMC-R-5  | Root      | <i>Streptomyces zaomyceticus</i>   | 99.79%           | OQ438711          |
| 6   | YMC-R-6  | Root      | <i>Streptomyces</i> sp. NJYH2618   | 99.86%           | OQ438712          |
| 7   | YMC-R-7  | Root      | <i>Streptomyces</i> sp. X1-2       | 98.86%           | OQ438713          |
| 8   | YMC-R-8  | Root      | <i>Streptomyces</i> sp.            | 99.38%           | OQ438714          |
| 9   | YMC-R-9  | Root      | <i>Streptomyces albogriseolus</i>  | 99.93%           | OQ438715          |
| 10  | YMC-R-10 | Root      | <i>Streptomyces albogriseolus</i>  | 100.00%          | OQ438716          |
| 11  | YMC-R-11 | Root      | <i>Bacillus cereus</i>             | 99.93%           | OQ438717          |
| 12  | YMC-SL-1 | Stem-Leaf | <i>Methylobacterium populi</i>     | 97.96%           | OQ438718          |
| 13  | YMC-SL-2 | Stem-Leaf | <i>Streptomyces lateritius</i>     | 99.86%           | OQ438719          |
| 14  | YMC-SL-3 | Stem-Leaf | <i>Curtobacterium</i> sp. b163     | 100.00%          | OQ438720          |
| 15  | YMC-F-1  | Flower    | <i>Streptomyces</i> sp. HF-0       | 100.00%          | OQ438721          |
| 16  | YMC-F-2  | Flower    | <i>Streptomyces</i> sp. G49        | 99.03%           | OQ438722          |
| 17  | YMC-F-3  | Flower    | <i>Streptomyces</i> sp. 3076       | 99.79%           | OQ438742          |
| 18  | YMC-F-4  | Flower    | <i>Streptomyces</i> sp. FSRh8      | 99.86%           | OQ438723          |
| 19  | YMC-F-5  | Flower    | <i>Streptomyces griseolus</i>      | 99.93%           | OQ438724          |
| 20  | YMC-F-6  | Flower    | <i>Streptomyces</i> sp. SM18       | 99.86%           | OQ438725          |
| 21  | YMC-F-7  | Flower    | <i>Streptomyces</i> sp. SM18       | 99.79%           | OQ438726          |

**Supplementary Table S6.** Phylogenetic analyses of 15 endophytic strains from *Perilla frutescens*.

| NO. | Strains | Parts       | Closest sequences by BlastN               | Percent Identity | Genbank accession |
|-----|---------|-------------|-------------------------------------------|------------------|-------------------|
| 1   | BS-R-1  | Root        | <i>Streptomyces fragilis</i>              | 99.65%           | OQ438801          |
| 2   | BS-AP-1 | Aerial-Part | <i>Streptomyces</i> sp.                   | 99.79%           | OQ438802          |
| 3   | BS-AP-2 | Aerial-Part | <i>Streptomyces</i> sp. JSM 147702        | 99.93%           | OQ438803          |
| 4   | BS-AP-3 | Aerial-Part | <i>Streptomyces tanashiensis</i>          | 99.36%           | OQ438804          |
| 5   | BS-AP-4 | Aerial-Part | <i>Streptomyces kunmingensis</i>          | 99.93%           | OQ438805          |
| 6   | BS-AP-5 | Aerial-Part | <i>Streptomyces</i> sp.                   | 99.57%           | OQ438806          |
| 7   | BS-AP-6 | Aerial-Part | <i>Methylobacterium</i> sp. MG-2011-78-DC | 99.86%           | OQ438807          |
| 8   | BS-AP-7 | Aerial-Part | <i>Nakamurella</i> sp.                    | 99.63%           | OQ438808          |
| 9   | BS-AP-8 | Aerial-Part | <i>Nakamurella</i> sp.                    | 99.92%           | OQ438809          |
| 10  | BS-AP-9 | Aerial-Part | <i>Streptomyces kunmingensis</i>          | 99.79%           | OQ438810          |
| 11  | BS-1    | Whole Plant | <i>Nocardia</i> sp. HBUM 79084            | 100.00%          | OQ438811          |
| 12  | BS-2    | Whole Plant | <i>Streptomyces</i> sp. ACTYS11           | 99.93%           | OQ438812          |
| 13  | BS-3    | Whole Plant | <i>Streptomyces</i> sp. FSRh6             | 99.86%           | OQ438813          |
| 14  | BS-4    | Whole Plant | <i>Streptomyces akiyoshiensis</i>         | 99.52%           | OQ438814          |
| 15  | BS-5    | Whole Plant | <i>Streptomyces</i> sp. JSM 147702        | 99.93%           | OQ438815          |

**Supplementary Table S7.** Phylogenetic analyses of 28 endophytic strains from *Prunella vulgaris*.

| NO. | Strains  | Parts      | Closest sequences by BlastN                   | Percent Identity | Genbank accession |
|-----|----------|------------|-----------------------------------------------|------------------|-------------------|
| 1   | XKC-R-1  | Root       | <i>Streptomyces</i> sp. SM18                  | 99.66%           | OQ449506          |
| 2   | XKC-R-2  | Root       | <i>Streptomyces</i> sp. W                     | 99.93%           | OQ449507          |
| 3   | XKC-R-3  | Root       | <i>Streptomyces zaomyceticus</i>              | 99.93%           | OQ449508          |
| 4   | XKC-R-4  | Root       | <i>Streptomyces</i> sp. 18(2008)              | 99.93%           | OQ449509          |
| 5   | XKC-R-5  | Root       | <i>Streptomyces</i> sp. SM18                  | 99.86%           | OQ449510          |
| 6   | XKC-R-6  | Root       | <i>Bacillus cereus</i>                        | 99.86%           | OQ449511          |
| 7   | XKC-R-7  | Root       | <i>Streptomyces</i> sp. ZG634                 | 99.72%           | OQ449512          |
| 8   | XKC-R-8  | Root       | <i>Streptomyces</i> sp. TY68-3                | 100.00%          | OQ449519          |
| 9   | XKC-R-9  | Root       | <i>Streptomyces</i> sp.                       | 98.00%           | OQ449513          |
| 10  | XKC-R-10 | Root       | <i>Streptomyces canus</i>                     | 96.09%           | OQ449514          |
| 11  | XKC-R-11 | Root       | <i>Streptomyces lateritius</i>                | 99.93%           | OQ449515          |
| 12  | XKC-R-12 | Root       | <i>Staphylococcus</i> sp.<br>MRSA154B15_13_3E | 100.00%          | OQ449516          |
| 13  | XKC-R-13 | Root       | <i>Streptomyces</i> sp. H                     | 99.86%           | OQ449517          |
| 14  | XKC-R-14 | Root       | <i>Streptomyces parvus</i>                    | 97.92%           | OQ449518          |
| 15  | XKC-R-15 | Root       | <i>Streptomyces</i> sp. H                     | 99.93%           | OQ449536          |
| 16  | XKC-R-16 | Root       | <i>Streptomyces luteogriseus</i>              | 99.93%           | OQ449552          |
| 17  | XKC-R-17 | Root       | <i>Streptomyces</i> sp. TY68-3                | 100.00%          | OQ449519          |
| 18  | XKC-R-18 | Root       | <i>Streptomyces hygroscopicus</i>             | 99.86%           | OQ449520          |
| 19  | XKC-R-19 | Root       | <i>Streptomyces</i> sp.                       | 99.15%           | OQ449521          |
| 20  | XKC-R-20 | Root       | <i>Streptomyces flavovariabilis</i>           | 99.86%           | OQ449522          |
| 21  | XKC-SL-1 | Stem-Leaf  | <i>Streptomyces</i> sp.                       | 97.88%           | OQ449523          |
| 22  | XKC-SL-2 | Stem--Leaf | <i>Kocuria</i> sp.                            | 100.00%          | OQ449524          |
| 23  | XKC-SL-3 | Stem-Leaf  | <i>Microbacterium</i> sp. HP4S                | 100.00%          | OQ449525          |
| 24  | XKC-SL-4 | Stem-Leaf  | <i>Methylobacterium</i> sp. N7                | 99.93%           | OQ449526          |
| 25  | XKC-SL-5 | Stem-Leaf  | <i>Streptomyces sannanensis</i>               | 99.65%           | OQ449527          |
| 26  | XKC-F-1  | Flower     | <i>Pseudomonas parafulva</i>                  | 99.86%           | OQ449503          |
| 27  | XKC-F-2  | Flower     | <i>Methylobacterium</i> sp. PB280             | 99.93%           | OQ449504          |
| 28  | XKC-F-3  | Flower     | <i>Streptomyces</i> sp. SM18                  | 99.86%           | OQ449505          |

**Supplementary Table S8.** Phylogenetic analyses of 16 endophytic strains from *Salvia miltiorrhiza*.

| NO. | Strains  | Parts     | Closest sequences by BlastN       | Percent Identity | Genbank accession |
|-----|----------|-----------|-----------------------------------|------------------|-------------------|
| 1   | DS-R-1   | Root      | <i>Nocardia tengchongensis</i>    | 99.93%           | OQ438792          |
| 2   | DS-SL-1  | Stem-Leaf | <i>Streptomyces</i> sp. E5N142    | 98.27%           | OQ438769          |
| 3   | DS-SL-2  | Stem-Leaf | <i>Streptomyces caviscabies</i>   | 99.79%           | OQ438770          |
| 4   | DS-SL-3  | Stem-Leaf | <i>Bosea</i> sp.                  | 99.93%           | OQ438771          |
| 5   | DS-SL-4  | Stem-Leaf | <i>Bacillus subtilis</i>          | 99.86%           | OQ438772          |
| 6   | DS-SL-5  | Stem-Leaf | <i>Kocuria carniphila</i>         | 99.93%           | OQ438773          |
| 7   | DS-SL-6  | Stem-Leaf | <i>Streptomyces</i> sp.           | 99.86%           | OQ438774          |
| 8   | DS-SL-7  | Stem-Leaf | <i>Streptomyces glauciniger</i>   | 99.93%           | OQ438775          |
| 9   | DS-SL-8  | Stem-Leaf | <i>Nocardia</i> sp. HBUM 79084    | 100.00%          | OQ438776          |
| 10  | DS-SL-9  | Stem-Leaf | <i>Streptomyces verne</i>         | 99.86%           | OQ438777          |
| 11  | DS-SL-10 | Stem-Leaf | <i>Streptomyces sannanensis</i>   | 99.79%           | OQ438778          |
| 12  | DS-SL-11 | Stem-Leaf | <i>Streptomyces</i> sp. NBRC 3111 | 99.79%           | OQ438779          |
| 13  | DS-F-1   | Flower    | <i>Actinomycetia</i> bacterium    | 100.00%          | OQ438780          |
| 14  | DS-F-2   | Flower    | <i>Nocardia</i> sp. HBUM 79084    | 100.00%          | OQ438781          |
| 15  | DS-F-3   | Flower    | <i>Microbacterium saperdae</i>    | 99.44%           | OQ438782          |
| 16  | DS-F-4   | Flower    | <i>Micromonospora aurantiaca</i>  | 100.00%          | OQ438783          |

**Supplementary Table S9.** Phylogenetic analyses of 28 endophytic strains from *Stemona sessilifolia*.

| NO. | Strains   | Parts      | Closest sequences by BlastN             | Percent Identity | Genbank accession |
|-----|-----------|------------|-----------------------------------------|------------------|-------------------|
| 1   | ZLBB-RT-1 | Root-Tuber | <i>Streptomyces</i> sp. KGS-6-31        | 99.85%           | OQ438618          |
| 2   | ZLBB-RT-2 | Root-Tuber | <i>Streptomyces pseudovenezuelae</i>    | 99.64%           | OQ438619          |
| 3   | ZLBB-RT-3 | Root-Tuber | <i>Streptomyces diastatochromogenes</i> | 99.57%           | OQ438620          |
| 4   | ZLBB-RT-4 | Root-Tuber | <i>Streptomyces microsporus</i>         | 99.79%           | OQ438621          |
| 5   | ZLBB-RT-5 | Root-Tuber | <i>Streptomyces</i> sp. STR30           | 99.86%           | OQ438622          |
| 6   | ZLBB-RT-6 | Root-Tuber | Same as 9                               | -                | -                 |
| 7   | ZLBB-RT-7 | Root-Tuber | <i>Staphylococcus xylosus</i>           | 99.93%           | OQ438623          |
| 8   | ZLBB-RT-8 | Root-Tuber | <i>Nocardia</i> sp. FXJ1.491            | 100.00%          | OQ438624          |
| 9   | ZLBB-RT-9 | Root-Tuber | <i>Nocardia niigatensis</i>             | 99.85%           | OQ438625          |
| 10  | ZLBB-L-1  | Leaf       | <i>Streptomyces</i> sp. A46Ydz-XG       | 99.93%           | OQ438626          |
| 11  | ZLBB-L-2  | Leaf       | <i>Streptomyces</i> sp. INBio_4515Q     | 98.78%           | OQ438627          |
| 12  | ZLBB-L-3  | Leaf       | <i>Streptomyces griseoruber</i>         | 97.10%           | OQ438628          |
| 13  | ZLBB-L-4  | Leaf       | <i>Micromonospora</i> sp. A6-9          | 100.00%          | OQ438629          |
| 14  | ZLBB-L-5  | Leaf       | <i>Streptomyces</i> sp.                 | 99.79%           | OQ438630          |
| 15  | ZLBB-L-6  | Leaf       | <i>Streptomyces</i> sp. BF-9            | 99.72%           | OQ438631          |
| 16  | ZLBB-S-1  | Stem       | <i>Streptomyces tauricus</i>            | 100.00%          | OQ438632          |
| 17  | ZLBB-S-2  | Stem       | <i>Streptomyces flavofungini</i>        | 99.86%           | OQ438633          |
| 18  | ZLBB-S-3  | Stem       | <i>Streptomyces</i> sp. A240 Ydz-QZ     | 99.93%           | OQ438634          |
| 19  | ZLBB-S-4  | Stem       | <i>Streptomyces thinghirensis</i>       | 100.00%          | OQ438635          |
| 20  | ZLBB-S-5  | Stem       | <i>Streptomyces</i> sp. CLI2509         | 99.93%           | OQ438636          |
| 21  | ZLBB-S-6  | Stem       | <i>Streptomyces rubiginosohelvolus</i>  | 100.00%          | OQ438637          |
| 22  | ZLBB-S-7  | Stem       | <i>Streptomyces</i> sp.                 | 99.93%           | OQ438638          |
| 23  | ZLBB-S-8  | Stem       | <i>Hyphomicrobium</i> sp.               | 98.98%           | OQ438639          |
| 24  | ZLBB-S-9  | Stem       | <i>Streptomyces</i> sp. RI104-LiC104    | 99.49%           | OQ438640          |
| 25  | ZLBB-S-10 | Stem       | <i>Streptomyces</i> sp. RI104-LiC104    | 99.31%           | OQ438641          |
| 26  | ZLBB-S-11 | Stem       | <i>Nocardia niigatensis</i>             | 98.00%           | OQ438642          |
| 27  | ZLBB-S-12 | Stem       | <i>Micromonospora</i> sp. A6-9          | 100.00%          | OQ438643          |
| 28  | ZLBB-S-13 | Stem       | <i>Nocardia niigatensis</i>             | 99.57%           | OQ438644          |

(Red color: selected for further study).

**Supplementary Table S10.** Experimental and calculated  $^{13}\text{C}$  NMR for **1** in  $\text{CDCl}_3$ .

|     | <b>1</b>              | <b>6S-1</b>           |                | <b>6R-1</b>           |                |
|-----|-----------------------|-----------------------|----------------|-----------------------|----------------|
| No. | $\delta_{\text{exp}}$ | $\delta_{\text{cal}}$ | $\Delta\delta$ | $\delta_{\text{cal}}$ | $\Delta\delta$ |
| 1   | 196.5                 | 198.5                 | -2.0           | 199.5                 | -3.0           |
| 2   | 103.4                 | 105.5                 | -2.1           | 108.5                 | -5.1           |
| 3   | 187.9                 | 183.5                 | 4.4            | 180.5                 | 7.4            |
| 4   | 97.3                  | 99.8                  | -2.5           | 102.8                 | -5.5           |
| 5   | 163.5                 | 159.8                 | 3.7            | 158.8                 | 4.7            |
| 6   | 75.0                  | 74.9                  | 0.1            | 74.9                  | 0.1            |
| 7   | 7.6                   | 6.8                   | 0.8            | 6.1                   | 1.5            |
| 8   | 32.8                  | 30.7                  | 2.1            | 28.7                  | 4.1            |
| 1'  | 185.1                 | 180.7                 | 4.4            | 179.7                 | 5.4            |
| 2'  | 123.8                 | 128.5                 | -4.7           | 128.6                 | -4.8           |
| 3'  | 144.1                 | 140.6                 | 3.5            | 140.6                 | 3.5            |
| 4'  | 131.2                 | 132.9                 | -1.7           | 132.9                 | -1.7           |
| 5'  | 140.4                 | 143.6                 | -3.2           | 143.6                 | -3.2           |
| 6'  | 18.9                  | 17.2                  | 1.7            | 17.2                  | 1.7            |

**Supplementary Table S11.** Antibacterial screening results of three selected endophytes (inhibition, %).

| Strains  | Organisms        |                |
|----------|------------------|----------------|
|          | <i>S. aureus</i> | <i>E. coli</i> |
| NX-S-6   | 64               | 26             |
| YHLB-L-2 | 51               | 72             |
| ZLBB-S-6 | 97               | 10             |

### 1.3 Supplementary Schemes

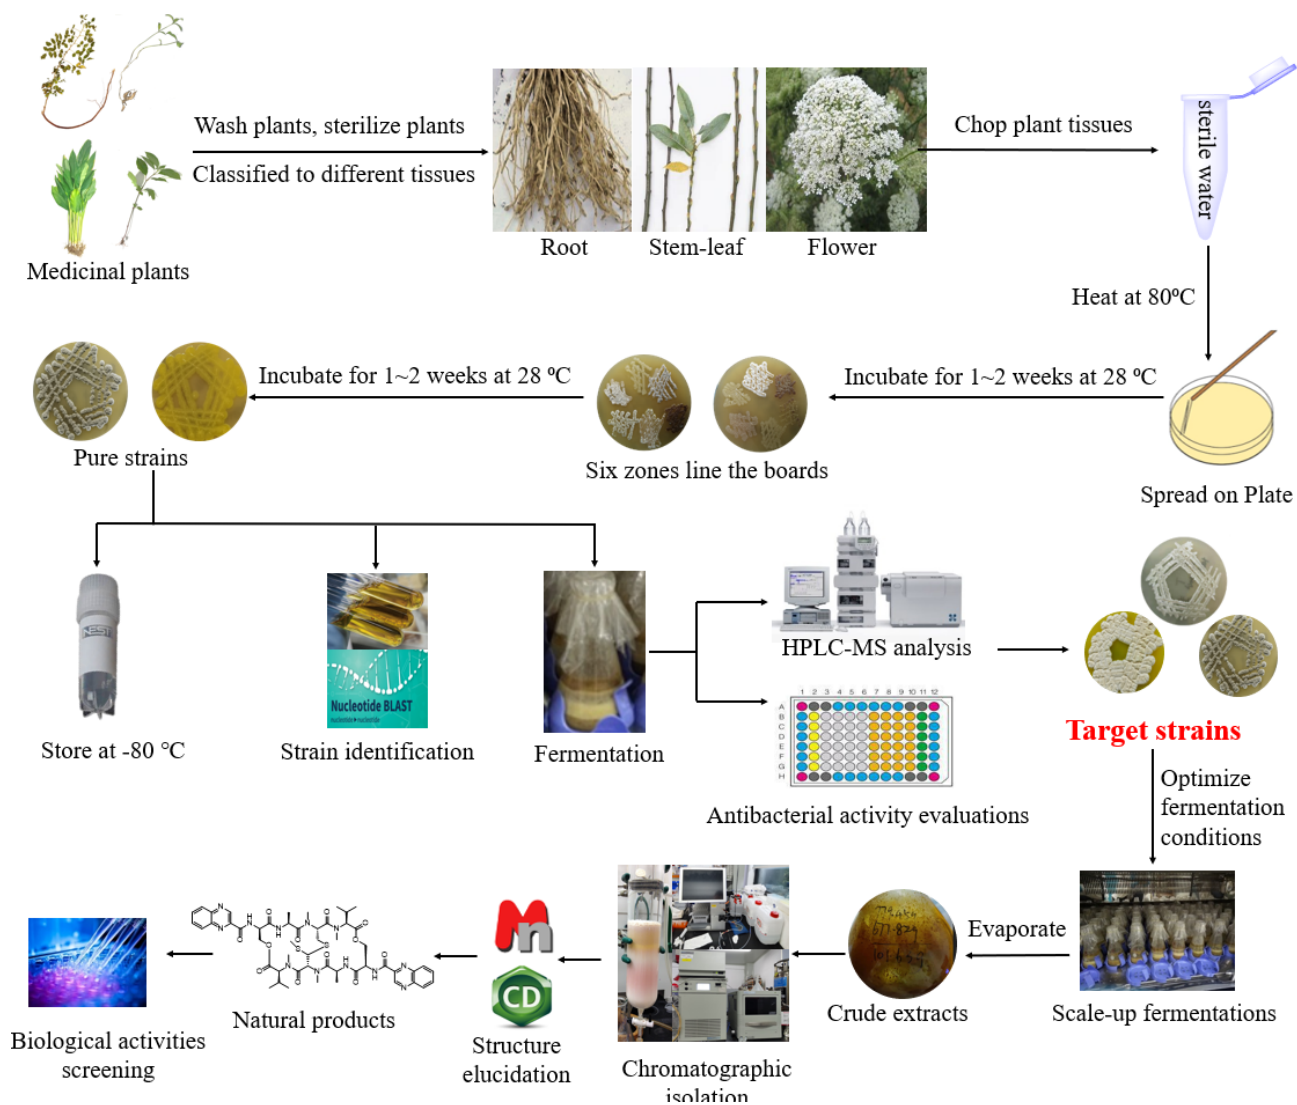

**Supplementary Scheme S1.** Working scheme for this project.

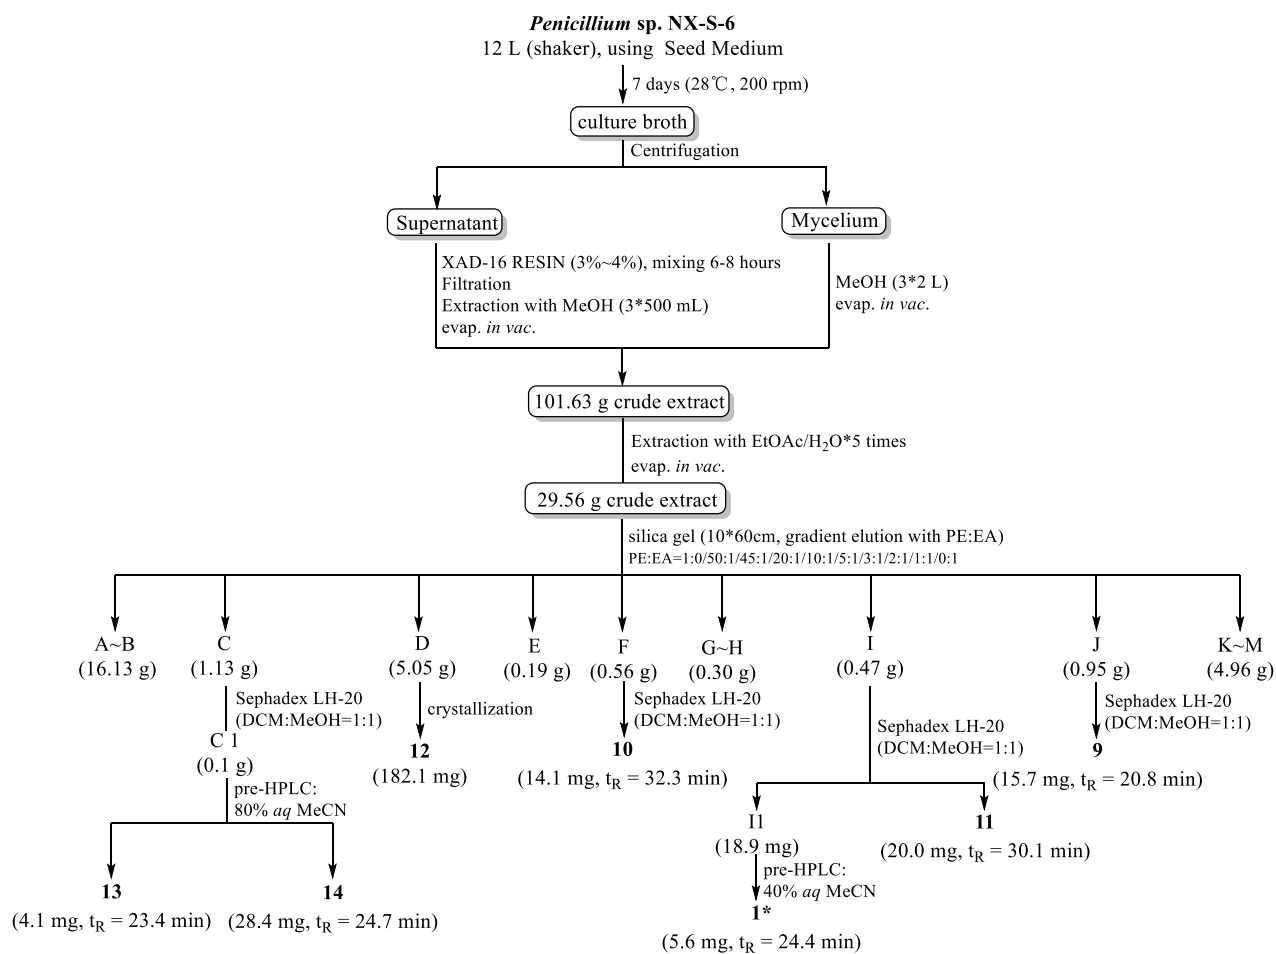

**Supplementary Scheme S2.** Work-up scheme for the *Penicillium* sp. NX-S-6 culture (1<sup>st</sup>).

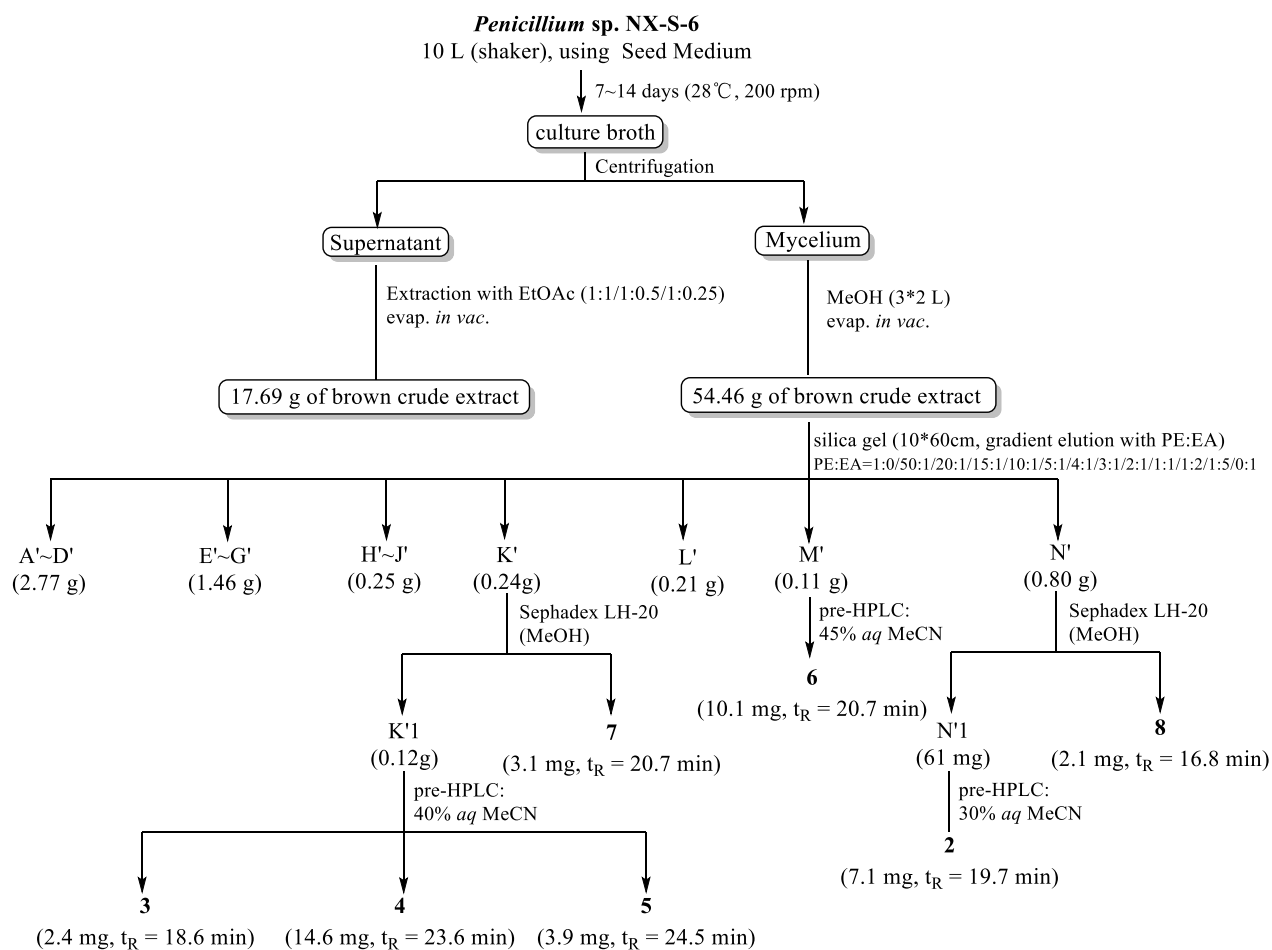

**Supplementary Scheme S3.** Work-up scheme for the *Penicillium sp.* NX-S-6 culture (2<sup>nd</sup>).

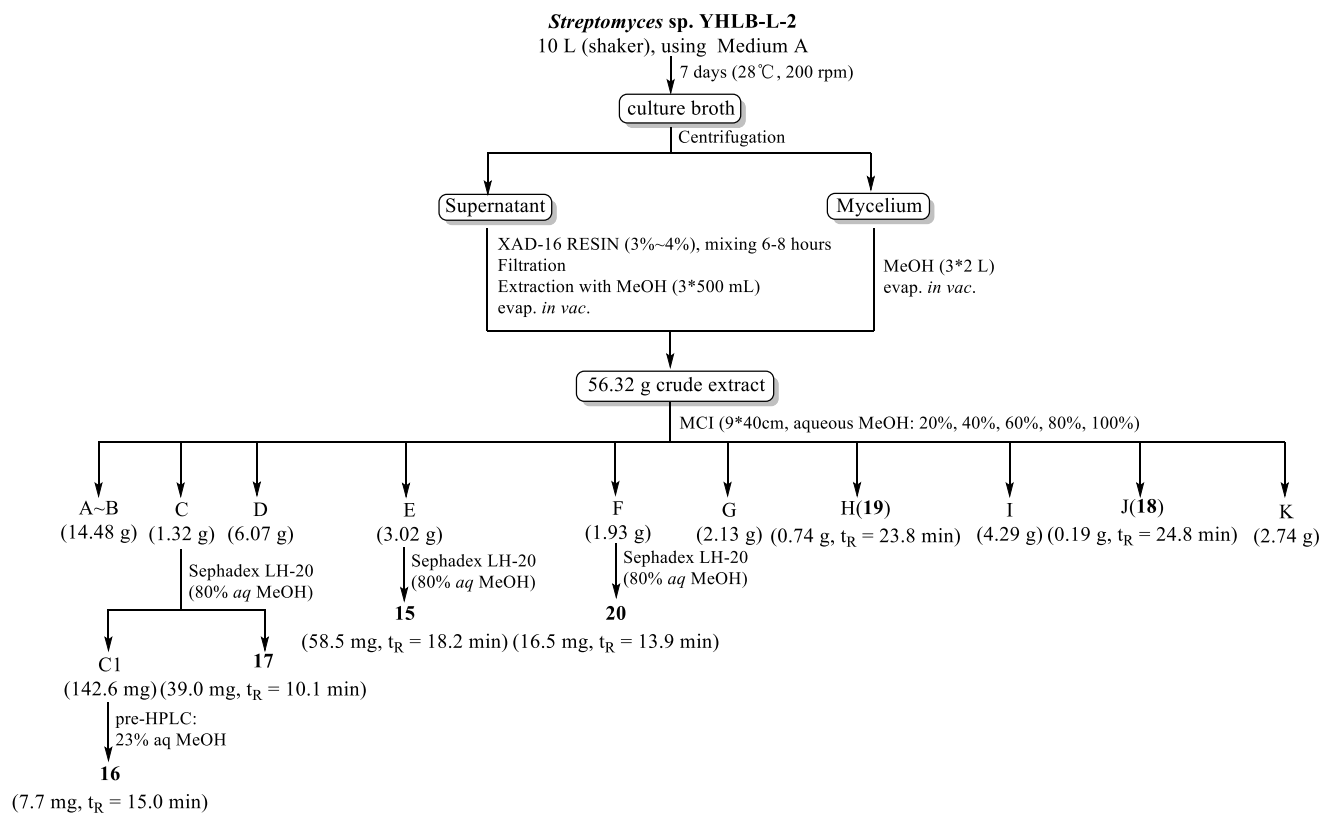

**Supplementary Scheme S4.** Work-up scheme for the *Streptomyces* sp. YHLB-L-2 culture.

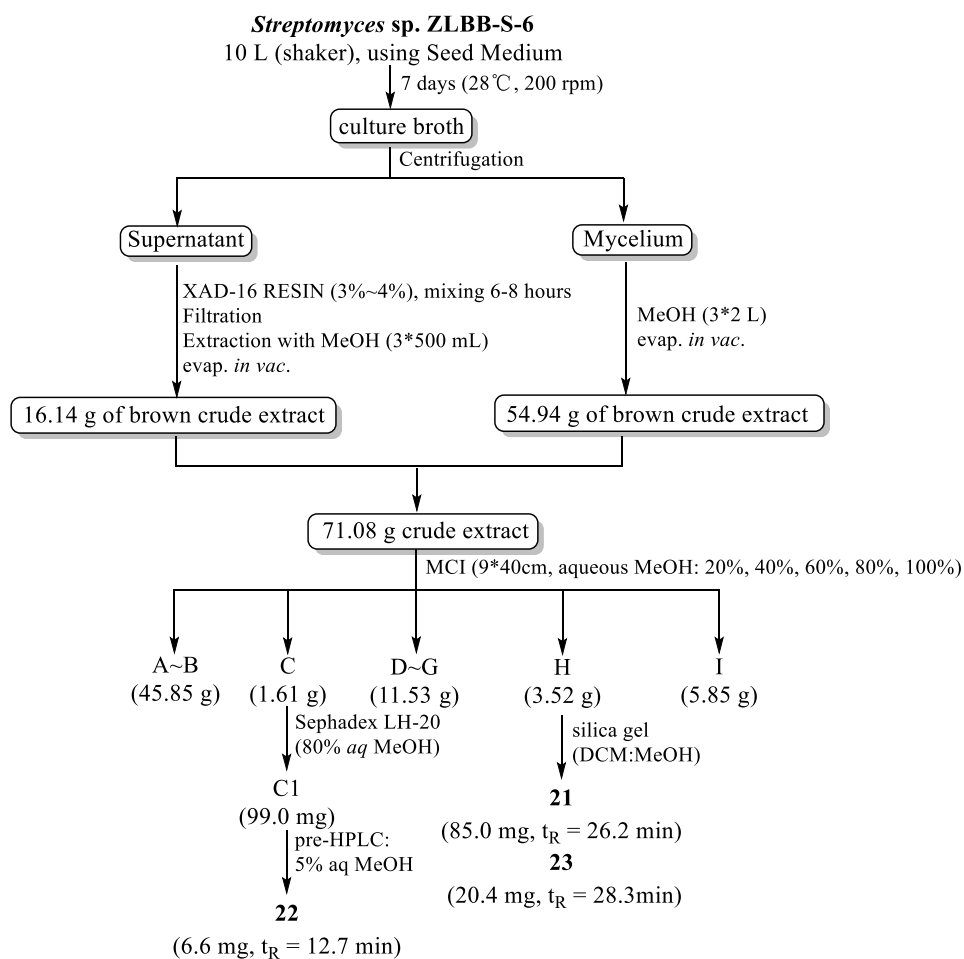

**Supplementary Scheme S5.** Work-up scheme for the *Streptomyces* sp. ZLBB-S-6 culture.
